# Supplementary material for: Establishing a human bone marrow single cell reference atlas to study ageing and diseases
Source: PubMed Central journal article supplement (PMC10050687; doi:10.3389/fimmu.2023.1127879), 2023-03-15

# Naive CD4 T cell

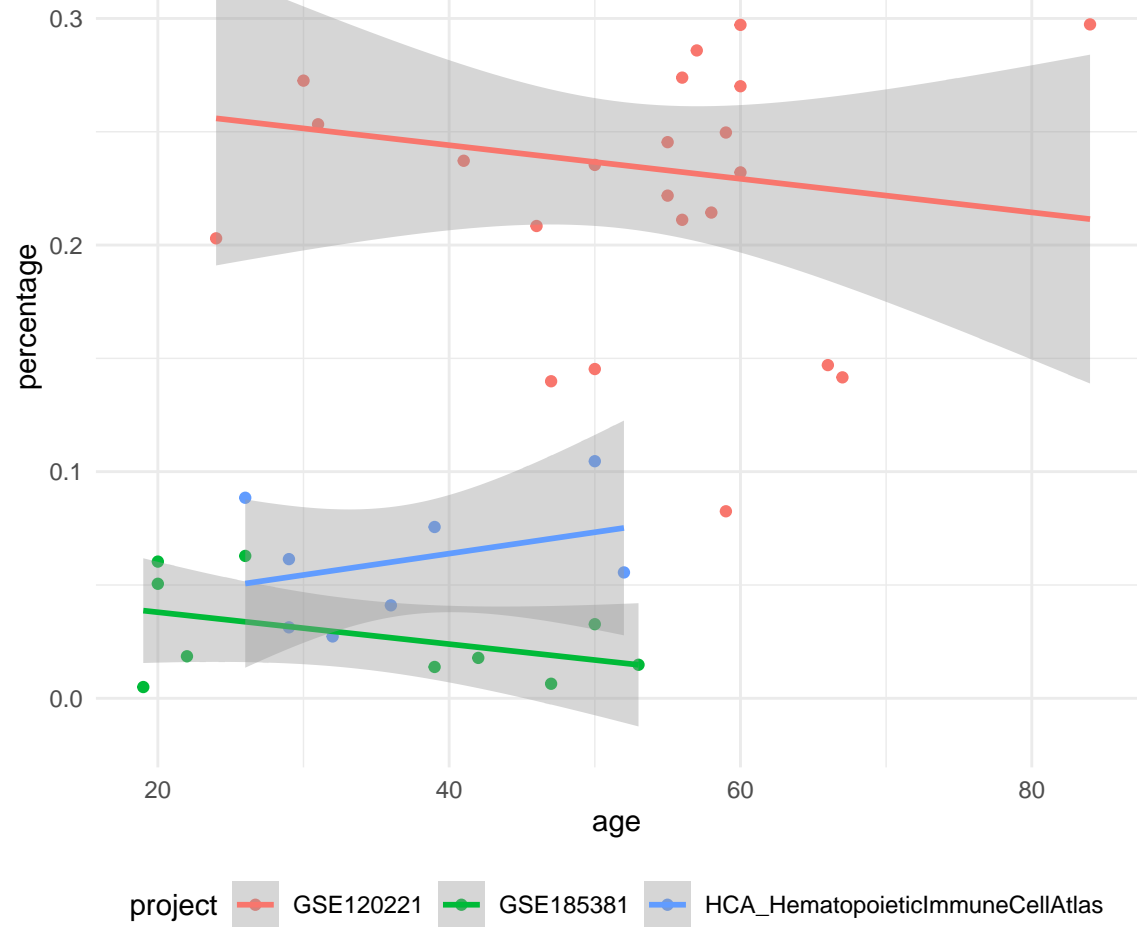

Supplement: DataSheet_5.pdf [file DataSheet_5.pdf]
