# Supplementary material for: Establishing a human bone marrow single cell reference atlas to study ageing and diseases
Source: Front Immunol. 2023 Mar 15;14:1127879. doi: 10.3389/fimmu.2023.1127879 (PMC10050687; doi:10.3389/fimmu.2023.1127879)
Supplement: Supplementary Table 1 — Data sample metadata. [file Table_1.xlsx]

## Sheet: Table 1 Sample metadata
sample_id	project_id	tissue	platform	age_group	cell_sorting	subject_id	age	gender	fetal_age_week
MantonBM7	HCA_HematopoieticImmuneCellAtlas	bone marrow	10x3'v2			MantonBM7	36	F	NA
MantonBM1	HCA_HematopoieticImmuneCellAtlas	bone marrow	10x3'v2			MantonBM1	52	F	NA
MantonBM6	HCA_HematopoieticImmuneCellAtlas	bone marrow	10x3'v2			MantonBM6	26	F	NA
MantonBM2	HCA_HematopoieticImmuneCellAtlas	bone marrow	10x3'v2			MantonBM2	50	M	NA
MantonBM4	HCA_HematopoieticImmuneCellAtlas	bone marrow	10x3'v2			MantonBM4	29	M	NA
MantonBM8	HCA_HematopoieticImmuneCellAtlas	bone marrow	10x3'v2			MantonBM8	32	F	NA
MantonBM5	HCA_HematopoieticImmuneCellAtlas	bone marrow	10x3'v2			MantonBM5	29	M	NA
MantonBM3	HCA_HematopoieticImmuneCellAtlas	bone marrow	10x3'v2			MantonBM3	39	M	NA
GSM5415745	GSE179346	bone marrow	10x3'v3				15	F	NA
ERX4720933	E-MTAB-9139	bone marrow	10x3'v3		CD45+CD38- hematopoietic cells	CBM12	80	F	NA
ERX4720934	E-MTAB-9139	bone marrow	10x3'v3		CD45+CD38- hematopoietic cells	CBM13	79	M	NA
ERX4147018	E-MTAB-9139	bone marrow	10x3'v3		Pooled non-hematopoietic cells + CD45+CD38- hematopoietic cells	CBM1	70	M	NA
ERX4720935	E-MTAB-9139	bone marrow	10x3'v3		CD45+CD38- hematopoietic cells	CBM14	76	M	NA
ERX4720936	E-MTAB-9139	bone marrow	10x3'v3		CD45+CD38- hematopoietic cells	CBM15	76	F	NA
ERX4720937	E-MTAB-9139	bone marrow	10x3'v3		CD45+CD38- hematopoietic cells	CBM16	64	M	NA
ERX4147013	E-MTAB-9139	bone marrow	10x3'v3		Pooled non-hematopoietic cells + CD45+CD38- hematopoietic cells	CBM2	27	M	NA
GSM5342390	GSE175604	bone marrow	10x5'v2		human regulatory T cells		26	M	NA
GSM5342389	GSE175604	bone marrow	10x5'v2		human regulatory T cells		30	F	NA
GSM5342388	GSE175604	bone marrow	10x5'v2		human regulatory T cells		45	M	NA
GSM5342387	GSE175604	bone marrow	10x5'v2		human regulatory T cells		26	M	NA
GSM5342385	GSE175604	bone marrow	10x5'v2		human regulatory T cells		40	M	NA
GSM5342386	GSE175604	bone marrow	10x5'v2		human regulatory T cells		34	F	NA
GSM3396174	GSE120221	bone marrow	10x3'v2				67		NA
GSM3396167	GSE120221	bone marrow	10x3'v2				41		NA
GSM3396162	GSE120221	bone marrow	10x3'v2				47		NA
GSM3396161	GSE120221	bone marrow	10x3'v2				59		NA
GSM3396183	GSE120221	bone marrow	10x3'v2				24		NA
GSM3396173	GSE120221	bone marrow	10x3'v2				60		NA
GSM3396184	GSE120221	bone marrow	10x3'v2				46		NA
GSM3396171	GSE120221	bone marrow	10x3'v2				84		NA
GSM3396172	GSE120221	bone marrow	10x3'v2				57		NA
GSM3396169	GSE120221	bone marrow	10x3'v2				50		NA
GSM3396170	GSE120221	bone marrow	10x3'v2				43		NA
GSM3396166	GSE120221	bone marrow	10x3'v2				30		NA
GSM3396176	GSE120221	bone marrow	10x3'v2				58		NA
GSM3396168	GSE120221	bone marrow	10x3'v2				58		NA
GSM3396178	GSE120221	bone marrow	10x3'v2				31		NA
GSM3396177	GSE120221	bone marrow	10x3'v2				66		NA
GSM3396185	GSE120221	bone marrow	10x3'v2				28		NA
GSM3396175	GSE120221	bone marrow	10x3'v2				50		NA
GSM3396181	GSE120221	bone marrow	10x3'v2				56		NA
GSM3396179	GSE120221	bone marrow	10x3'v2				56		NA
GSM3396182	GSE120221	bone marrow	10x3'v2				55		NA
GSM3396180	GSE120221	bone marrow	10x3'v2				55		NA
GSM3396163	GSE120221	bone marrow	10x3'v2				60		NA
GSM3396165	GSE120221	bone marrow	10x3'v2				60		NA
GSM3396164	GSE120221	bone marrow	10x3'v2				59		NA
GSM5672602	GSE188222	bone marrow	10x3'v2				35	F	NA
GSM5774294	GSE193138	bone marrow	10x3'v2			Donor2	NA	M	NA
GSM5774293	GSE193138	bone marrow	10x3'v2			Donor1	NA	M	NA
GSM4850584	GSE159929	bone marrow	10x5'v2			1	31	M	NA
GSM5515743	GSE181989	bone marrow	10x3'v2		mixed sample (MNCs were mixed with CD34+ cells in a ratio of 4:1)		37		NA
ERX8792052	E-MTAB-11536		10x5'v2	61 to 65			63	M	NA
ERX8791950	E-MTAB-11536		10x5'v2	66 to 70			68	F	NA
ERX8792088	E-MTAB-11536		10x5'v2	56 to 60			58	F	NA
ERX8791986	E-MTAB-11536		10x5'v2	51 to 55			53	M	NA
ERX8792009	E-MTAB-11536		10x5'v2	71 to 75			73	M	NA
GSM4836008	GSE159624	bone marrow	10x3'v2		NK cells		NA		NA
GSM4836009	GSE159624	bone marrow	10x3'v2		NK cells		NA		NA
GSM4836010	GSE159624	bone marrow	10x3'v2		NK cells		NA		NA
GSM4836004	GSE159624	bone marrow	10x3'v2		NK cells		NA		NA
GSM4836003	GSE159624	bone marrow	10x3'v2		NK cells		NA		NA
GSM4836006	GSE159624	bone marrow	10x3'v2		NK cells		NA		NA
GSM4836007	GSE159624	bone marrow	10x3'v2		NK cells		NA		NA
GSM4836005	GSE159624	bone marrow	10x3'v2		NK cells		NA		NA
GSM3738539	GSE130430	bone marrow	10x3'v2		Lin(CD3E, CD19, CD14 or CD3E, CD19, CD14, CD20, and CD34)- CD7+		26	F	NA
GSM3738538	GSE130430	bone marrow	10x3'v2		Lin(CD3E, CD19, CD14 or CD3E, CD19, CD14, CD20, and CD34)- CD7+		25	F	NA
GSM3738537	GSE130430	bone marrow	10x3'v2		Lin(CD3E, CD19, CD14 or CD3E, CD19, CD14, CD20, and CD34)- CD7+		25	F	NA
GSM3738536	GSE130430	bone marrow	10x3'v2		Lin(CD3E, CD19, CD14 or CD3E, CD19, CD14, CD20, and CD34)- CD7+		24	F	NA
GSM3738540	GSE130430	bone marrow	10x3'v2		Lin(CD3E, CD19, CD14 or CD3E, CD19, CD14, CD20, and CD34)- CD7+		25	M	NA
GSM3738541	GSE130430	bone marrow	10x3'v2		Lin(CD3E, CD19, CD14 or CD3E, CD19, CD14, CD20, and CD34)- CD7+		35	M	NA
GSM4138873	GSE139369	bone marrow	CITE-seq				NA	F	NA
GSM4138872	GSE139369	bone marrow	CITE-seq				NA	F	NA
GSM5047372	GSE165645	bone marrow	10x5'v2				2		NA
GSM3681518	GSE128639	bone marrow	CITE-seq		Bone Marrow Mononuclear Cells		NA		NA
ERX4720942	E-MTAB-9139	bone marrow	10x3'v3		CD38+ hematopoietic cells	CBM16	64	M	NA
ERX4720941	E-MTAB-9139	bone marrow	10x3'v3		CD38+ hematopoietic cells	CBM15	76	F	NA
ERX4720940	E-MTAB-9139	bone marrow	10x3'v3		CD38+ hematopoietic cells	CBM14	76	M	NA
ERX4720939	E-MTAB-9139	bone marrow	10x3'v3		CD38+ hematopoietic cells	CBM13	79	M	NA
ERX4720938	E-MTAB-9139	bone marrow	10x3'v3		CD38+ hematopoietic cells	CBM12	80	F	NA
Control4003	GSE185381		10x3'v3				42	M	NA
Control0005	GSE185381		10x3'v3				22	M	NA
Control0082	GSE185381		10x3'v3				19	M	NA
Control4	GSE185381		10x3'v3				20	M	NA
Control3	GSE185381		10x3'v3				50	F	NA
Control1	GSE185381		10x3'v3				26	F	NA
Control2	GSE185381		10x3'v3				39	M	NA
Control0058	GSE185381		10x3'v3				20	M	NA
Control0004	GSE185381		10x3'v3				53	M	NA
ERX4327590	E-MTAB-9389		10x5'v2		CD45 positive	F51	NA	F	15
ERX4327591	E-MTAB-9389		10x5'v2		CD45 positive	F51	NA	F	15
ERX4327592	E-MTAB-9389		10x5'v2		CD45 positive	F51	NA	F	15
ERX4327612	E-MTAB-9389		10x5'v2			F30	NA	M	14
ERX4327611	E-MTAB-9389		10x5'v2			F29	NA	F	17
ERX4327589	E-MTAB-9389		10x5'v2		CD45 positive	F50	NA	F	15
ERX4327588	E-MTAB-9389		10x5'v2		CD45 positive	F50	NA	F	15
ERX4327585	E-MTAB-9389		10x5'v2		CD45 positive	F41	NA	F	16
ERX4327607	E-MTAB-9389		10x3'v2		CD45 positive	F30	NA	M	14
ERX4327605	E-MTAB-9389		10x3'v2		CD45 positive	F21	NA	M	16
ERX4327584	E-MTAB-9389		10x3'v2		CD45 positive	F41	NA	F	16
ERX4327606	E-MTAB-9389		10x3'v2		CD45 positive	F29	NA	F	17
ERX4327587	E-MTAB-9389		10x5'v2		CD45 positive	F45	NA	F	13
ERX4327576	E-MTAB-9389		10x5'v2		CD45 negative	F45	NA	F	13
ERX4327586	E-MTAB-9389		10x3'v2		CD45 positive	F45	NA	F	13
ERX4327575	E-MTAB-9389		10x3'v2		CD45 negative	F45	NA	F	13
ERX4327604	E-MTAB-9389		10x3'v2		CD45 negative	F30	NA	M	14
ERX4327602	E-MTAB-9389		10x3'v2		CD45 negative	F21	NA	M	16
ERX4327603	E-MTAB-9389		10x3'v2		CD45 negative	F29	NA	F	17
ERX4327583	E-MTAB-9389		10x3'v2		CD45 positive	F38	NA	M	12
ERX4327582	E-MTAB-9389		10x3'v2		CD45 positive	F38	NA	M	12
GSM5087731	GSE166895	bone marrow	10x3'v3	stage 3	MNCs		NA		NA
GSM5087739	GSE166895	bone marrow	10x3'v3	stage_2	CD34+		NA		NA
ERX4327599	E-MTAB-9389		10x5'v2		CD45 positive	F51	NA	F	15
ERX4327598	E-MTAB-9389		10x5'v2		CD45 positive	F51	NA	F	15
ERX4327597	E-MTAB-9389		10x5'v2		CD45 positive	F51	NA	F	15
ERX4327608	E-MTAB-9389		10x5'v2		CD45 positive	F50	NA	F	15
ERX4327609	E-MTAB-9389		10x5'v2		CD45 positive	F50	NA	F	15
GSM3901485	GSE133181	bone marrow	10x3'v2		CD34+ cells		53		NA
GSM3901486	GSE133181	bone marrow	10x3'v2		CD34+ cells		21		NA
GSM3901487	GSE133181	bone marrow	10x3'v2		CD34+ cells		30		NA
GSM3901492	GSE133181	bone marrow	10x3'v2		Lin-CD34+ cells		53		NA
GSM3901488	GSE133181	bone marrow	10x3'v2		CD34+ cells		41		NA
GSM5087733	GSE166895	bone marrow	10x3'v3	adult_fetal_stage_3	CD34+		NA		NA
GSM5087735	GSE166895	bone marrow	10x3'v3	adult_fetal_stage_3	CD34+		NA		NA
GSM5202204	GSE169426	bone marrow	10x3'v2		CD34+		74	M	NA
GSM5202203	GSE169426	bone marrow	10x3'v2		CD34+		68	F	NA
ERX3989381	E-MTAB-8884	bone marrow	10x3'v2		Lin-CD34+CD38- hematopoietic stem cell	HV3	36	M	NA
ERX3989380	E-MTAB-8884	bone marrow	10x3'v2		Lin-CD34+CD38- hematopoietic stem cell	HV2	37	M	NA
ERX3989379	E-MTAB-8884	bone marrow	10x3'v2		Lin-CD34+CD38- hematopoietic stem cell	HV1	52	M	NA
GSM3993355	GSE135194	bone marrow	10x3'v2		Lineage(CD3CD14CD19)-CD34+		44	M	NA
GSM3993353	GSE135194	bone marrow	10x3'v2		Lineage(CD3CD14CD19)-CD34+		31	F	NA
GSM3993354	GSE135194	bone marrow	10x3'v2		Lineage(CD3CD14CD19)-CD34+		41	F	NA
GSM3993352	GSE135194	bone marrow	10x3'v2		Lineage(CD3CD14CD19)-CD34+		25	F	NA
GSM4138875	GSE139369	bone marrow	CITE-seq		CD34+		NA	F	NA
GSM4138874	GSE139369	bone marrow	CITE-seq		CD34+		NA	M	NA
GSM5515744	GSE181989	bone marrow	10x3'v2		mixed sample (MNCs were mixed with CD34+ cells in a ratio of 4:1)		47		NA
Control5	GSE185381		10x3'v3				47	M	NA
ERX4327581	E-MTAB-9389		10x5'v2		CD45 negative	F51	NA	F	15
ERX4327580	E-MTAB-9389		10x5'v2		CD45 negative	F51	NA	F	15
ERX4327579	E-MTAB-9389		10x5'v2		CD45 negative	F51	NA	F	15
ERX4327574	E-MTAB-9389		10x5'v2		CD45 negative	F41	NA	F	16
ERX4327578	E-MTAB-9389		10x5'v2		CD45 negative	F50	NA	F	15
ERX4327577	E-MTAB-9389		10x5'v2		CD45 negative	F50	NA	F	15
ERX4327573	E-MTAB-9389		10x3'v2		CD45 negative	F41	NA	F	16
ERX4327600	E-MTAB-9389		10x3'v2			F29	NA	F	17

## Sheet: Table 2 Cell_type_DEG
p_val	avg_log2FC	pct.1	pct.2	p_val_adj	cluster	gene
0	1.64035	0.989	0.279	0	CD14+MHCIIhigh monocyte	S100A9
0	1.52659	0.964	0.135	0	CD14+MHCIIhigh monocyte	FCN1
0	1.49562	0.969	0.257	0	CD14+MHCIIhigh monocyte	S100A8
0	1.46102	0.912	0.133	0	CD14+MHCIIhigh monocyte	VCAN
0	1.44887	0.996	0.354	0	CD14+MHCIIhigh monocyte	LYZ
0	1.38821	0.898	0.283	0	CD14+MHCIIhigh monocyte	NAMPT
0	1.31774	0.985	0.4	0	CD14+MHCIIhigh monocyte	CTSS
0	1.31673	0.783	0.101	0	CD14+MHCIIhigh monocyte	S100A12
0	1.22567	0.993	0.396	0	CD14+MHCIIhigh monocyte	TYROBP
0	1.20748	0.796	0.064	0	CD14+MHCIIhigh monocyte	SERPINA1
0	1.20119	0.792	0.08	0	CD14+MHCIIhigh monocyte	CLEC7A
0	1.13659	0.715	0.062	0	CD14+MHCIIhigh monocyte	CD14
0	1.11988	0.851	0.172	0	CD14+MHCIIhigh monocyte	CSTA
0	1.10212	0.635	0.039	0	CD14+MHCIIhigh monocyte	LGALS2
0	1.08254	0.989	0.608	0	CD14+MHCIIhigh monocyte	NEAT1
0	1.05795	0.827	0.233	0	CD14+MHCIIhigh monocyte	TYMP
0	1.02295	0.962	0.389	0	CD14+MHCIIhigh monocyte	LST1
0	1.01224	0.984	0.479	0	CD14+MHCIIhigh monocyte	CST3
0	1.00701	0.788	0.352	0	CD14+MHCIIhigh monocyte	ATP2B1
0	1.00482	0.709	0.254	0	CD14+MHCIIhigh monocyte	ARHGAP26
0	0.991434	0.756	0.176	0	CD14+MHCIIhigh monocyte	CFD
0	0.98007	0.508	0.029	0	CD14+MHCIIhigh monocyte	PID1
0	0.958468	0.92	0.374	0	CD14+MHCIIhigh monocyte	S100A11
0	0.957329	0.723	0.237	0	CD14+MHCIIhigh monocyte	PLXDC2
0	0.955796	0.451	0.049	0	CD14+MHCIIhigh monocyte	G0S2
0	0.946128	0.655	0.149	0	CD14+MHCIIhigh monocyte	PLAUR
0	0.941717	0.972	0.569	0	CD14+MHCIIhigh monocyte	SAT1
0	0.940289	0.722	0.124	0	CD14+MHCIIhigh monocyte	MS4A6A
0	0.922175	0.938	0.42	0	CD14+MHCIIhigh monocyte	COTL1
0	0.916841	0.959	0.479	0	CD14+MHCIIhigh monocyte	AIF1
0	0.912884	0.913	0.36	0	CD14+MHCIIhigh monocyte	FCER1G
0	0.905224	0.691	0.173	0	CD14+MHCIIhigh monocyte	MNDA
0	0.897283	0.62	0.111	0	CD14+MHCIIhigh monocyte	FGL2
0	0.892493	0.952	0.521	0	CD14+MHCIIhigh monocyte	PSAP
0	0.890152	0.698	0.204	0	CD14+MHCIIhigh monocyte	CEBPB
0	0.861617	0.645	0.163	0	CD14+MHCIIhigh monocyte	CEBPD
0	0.854174	0.791	0.352	0	CD14+MHCIIhigh monocyte	AP1S2
0	0.842781	0.508	0.058	0	CD14+MHCIIhigh monocyte	MAFB
0	0.837353	0.997	0.704	0	CD14+MHCIIhigh monocyte	S100A6
0	0.83528	0.55	0.074	0	CD14+MHCIIhigh monocyte	SLC11A1
0	0.828245	0.383	0.058	0	CD14+MHCIIhigh monocyte	CXCL8
0	0.820775	0.642	0.169	0	CD14+MHCIIhigh monocyte	CSF3R
0	0.78919	0.548	0.126	0	CD14+MHCIIhigh monocyte	FAM49A
0	0.7877	0.61	0.134	0	CD14+MHCIIhigh monocyte	CFP
0	0.784006	0.623	0.163	0	CD14+MHCIIhigh monocyte	LGALS3
0	0.756089	0.466	0.042	0	CD14+MHCIIhigh monocyte	C5AR1
0	0.745243	0.563	0.148	0	CD14+MHCIIhigh monocyte	ATP2B1-AS1
0	0.74295	0.58	0.153	0	CD14+MHCIIhigh monocyte	CYBB
0	0.736761	0.526	0.115	0	CD14+MHCIIhigh monocyte	DMXL2
0	0.724785	0.561	0.137	0	CD14+MHCIIhigh monocyte	KLF4
0	0.722561	0.989	0.692	0	CD14+MHCIIhigh monocyte	SRGN
0	0.719515	0.486	0.111	0	CD14+MHCIIhigh monocyte	ACSL1
0	0.717662	0.997	0.725	0	CD14+MHCIIhigh monocyte	S100A4
0	0.715505	0.539	0.115	0	CD14+MHCIIhigh monocyte	MPEG1
0	0.704138	0.459	0.079	0	CD14+MHCIIhigh monocyte	BCL2A1
0	0.703083	0.471	0.101	0	CD14+MHCIIhigh monocyte	KYNU
0	0.691914	0.5	0.093	0	CD14+MHCIIhigh monocyte	NCF2
0	0.687959	0.489	0.101	0	CD14+MHCIIhigh monocyte	CD86
0	0.680791	0.565	0.138	0	CD14+MHCIIhigh monocyte	FGR
0	0.661766	0.446	0.081	0	CD14+MHCIIhigh monocyte	IFI30
0	0.648975	0.428	0.09	0	CD14+MHCIIhigh monocyte	SGK1
0	0.639075	0.46	0.08	0	CD14+MHCIIhigh monocyte	PILRA
0	0.618725	0.394	0.033	0	CD14+MHCIIhigh monocyte	TREM1
0	0.61651	0.396	0.044	0	CD14+MHCIIhigh monocyte	FPR1
0	0.608998	0.366	0.017	0	CD14+MHCIIhigh monocyte	CD300E
0	0.603417	0.426	0.069	0	CD14+MHCIIhigh monocyte	SLC7A7
0	0.599801	0.359	0.014	0	CD14+MHCIIhigh monocyte	CLEC4E
0	0.591681	1	0.973	0	CD14+MHCIIhigh monocyte	FTL
0	0.588024	0.384	0.043	0	CD14+MHCIIhigh monocyte	RBP7
0	0.579311	0.399	0.064	0	CD14+MHCIIhigh monocyte	TLR2
0	0.561199	0.383	0.063	0	CD14+MHCIIhigh monocyte	TNFAIP2
0	0.536027	0.354	0.046	0	CD14+MHCIIhigh monocyte	LILRA5
0	0.533716	0.322	0.033	0	CD14+MHCIIhigh monocyte	TMEM176B
0	0.530661	0.341	0.053	0	CD14+MHCIIhigh monocyte	NLRP3
0	0.516221	0.361	0.064	0	CD14+MHCIIhigh monocyte	ODF3B
0	0.512744	1	0.963	0	CD14+MHCIIhigh monocyte	FTH1
0	0.509095	0.373	0.061	0	CD14+MHCIIhigh monocyte	LILRB2
0	0.504375	0.372	0.064	0	CD14+MHCIIhigh monocyte	CDA
2.12653e-304	0.713454	0.576	0.171	7.13196e-300	CD14+MHCIIhigh monocyte	CPVL
2.29947e-302	0.68403	0.603	0.169	7.71197e-298	CD14+MHCIIhigh monocyte	CD68
4.03079e-301	0.73012	0.622	0.193	1.35185e-296	CD14+MHCIIhigh monocyte	RAB31
5.33399e-300	0.749837	0.74	0.282	1.78891e-295	CD14+MHCIIhigh monocyte	SPI1
3.49696e-298	0.791237	0.773	0.366	1.17281e-293	CD14+MHCIIhigh monocyte	ASAH1
1.86263e-297	0.804181	0.91	0.437	6.24688e-293	CD14+MHCIIhigh monocyte	S100A10
1.50078e-294	0.768464	0.55	0.154	5.03331e-290	CD14+MHCIIhigh monocyte	RBM47
6.55434e-292	0.79756	0.705	0.259	2.19819e-287	CD14+MHCIIhigh monocyte	RGS2
1.78256e-289	0.82104	0.95	0.571	5.97835e-285	CD14+MHCIIhigh monocyte	FOS
3.55653e-289	0.507299	0.342	0.061	1.19279e-284	CD14+MHCIIhigh monocyte	ITGAX
4.64986e-285	0.596683	0.345	0.062	1.55947e-280	CD14+MHCIIhigh monocyte	THBS1
6.48046e-281	0.626435	0.461	0.115	2.17342e-276	CD14+MHCIIhigh monocyte	SLC43A2
8.54248e-281	0.644782	0.408	0.087	2.86498e-276	CD14+MHCIIhigh monocyte	DOCK4
2.08146e-273	-0.529277	0.797	0.938	6.98078e-269	CD14+MHCIIhigh monocyte	RPSA
7.08254e-273	0.935376	0.63	0.228	2.37534e-268	CD14+MHCIIhigh monocyte	SIPA1L1
1.31366e-269	0.820465	0.56	0.158	4.40577e-265	CD14+MHCIIhigh monocyte	AC020656.1
1.75951e-269	0.692188	0.574	0.186	5.90103e-265	CD14+MHCIIhigh monocyte	TNFSF13B
2.35578e-267	0.630274	0.487	0.134	7.90081e-263	CD14+MHCIIhigh monocyte	C9orf72
9.19178e-266	0.888554	0.716	0.309	3.08274e-261	CD14+MHCIIhigh monocyte	DPYD
1.09977e-265	0.593297	0.449	0.11	3.6884e-261	CD14+MHCIIhigh monocyte	SULF2
5.14782e-262	0.525702	0.342	0.067	1.72647e-257	CD14+MHCIIhigh monocyte	EPB41L3
1.51391e-260	0.645789	0.567	0.173	5.07735e-256	CD14+MHCIIhigh monocyte	TNFRSF1B
1.79336e-260	0.789957	0.95	0.462	6.01456e-256	CD14+MHCIIhigh monocyte	LGALS1
7.5209e-254	0.596828	0.46	0.122	2.52236e-249	CD14+MHCIIhigh monocyte	STX11
5.47575e-253	0.575969	0.439	0.111	1.83646e-248	CD14+MHCIIhigh monocyte	CLEC12A
5.5848e-253	0.595123	0.442	0.114	1.87303e-248	CD14+MHCIIhigh monocyte	EMILIN2
8.45215e-251	0.834718	0.614	0.229	2.83468e-246	CD14+MHCIIhigh monocyte	GAB2
1.53533e-248	0.680035	0.542	0.163	5.1492e-244	CD14+MHCIIhigh monocyte	CD83
5.61947e-246	0.724475	0.791	0.419	1.88466e-241	CD14+MHCIIhigh monocyte	MCL1
4.0533e-244	0.72144	0.899	0.598	1.3594e-239	CD14+MHCIIhigh monocyte	DUSP1
3.26457e-241	0.796032	0.736	0.371	1.09487e-236	CD14+MHCIIhigh monocyte	QKI
4.68526e-240	0.653002	0.874	0.558	1.57134e-235	CD14+MHCIIhigh monocyte	TSPO
3.1351e-238	0.530731	0.364	0.08	1.05145e-233	CD14+MHCIIhigh monocyte	LRRK2
2.96468e-236	0.61216	0.517	0.156	9.94295e-232	CD14+MHCIIhigh monocyte	JAML
2.76825e-232	0.504406	0.351	0.077	9.28415e-228	CD14+MHCIIhigh monocyte	TMEM170B
6.52297e-232	0.594031	0.425	0.109	2.18767e-227	CD14+MHCIIhigh monocyte	AC022217.3
2.26843e-229	0.532542	0.398	0.098	7.60785e-225	CD14+MHCIIhigh monocyte	PLBD1
3.38847e-229	0.684386	0.497	0.148	1.13643e-224	CD14+MHCIIhigh monocyte	SLC8A1
1.01328e-228	0.575875	0.426	0.112	3.39834e-224	CD14+MHCIIhigh monocyte	UPP1
2.13697e-228	0.697202	0.586	0.199	7.16697e-224	CD14+MHCIIhigh monocyte	AOAH
4.52115e-224	0.661914	0.699	0.313	1.5163e-219	CD14+MHCIIhigh monocyte	EVI2B
2.21424e-223	0.637708	0.509	0.161	7.42613e-219	CD14+MHCIIhigh monocyte	SLCO3A1
9.55949e-223	0.754234	0.756	0.375	3.20606e-218	CD14+MHCIIhigh monocyte	LYN
1.32762e-220	0.754366	0.856	0.53	4.45257e-216	CD14+MHCIIhigh monocyte	ZEB2
1.73129e-219	0.597131	0.613	0.208	5.80641e-215	CD14+MHCIIhigh monocyte	CD36
8.34987e-219	0.515182	0.378	0.091	2.80038e-214	CD14+MHCIIhigh monocyte	ENTPD1
5.18948e-218	0.708123	0.704	0.32	1.74045e-213	CD14+MHCIIhigh monocyte	STXBP2
4.91217e-213	0.664389	0.689	0.316	1.64744e-208	CD14+MHCIIhigh monocyte	VSIR
5.99153e-213	0.548977	0.457	0.133	2.00944e-208	CD14+MHCIIhigh monocyte	HCK
8.24069e-211	0.52272	0.415	0.114	2.76376e-206	CD14+MHCIIhigh monocyte	LY96
8.73016e-211	0.581619	0.898	0.59	2.92792e-206	CD14+MHCIIhigh monocyte	EMP3
3.29934e-209	0.644442	0.635	0.256	1.10653e-204	CD14+MHCIIhigh monocyte	C1orf162
3.87459e-209	0.532147	0.416	0.114	1.29946e-204	CD14+MHCIIhigh monocyte	CSF2RA
3.7727e-207	0.633581	0.812	0.487	1.26529e-202	CD14+MHCIIhigh monocyte	NPC2
5.08011e-205	0.672808	0.861	0.482	1.70377e-200	CD14+MHCIIhigh monocyte	HLA-DRB1
2.9666e-204	0.67115	0.589	0.243	9.94938e-200	CD14+MHCIIhigh monocyte	BRI3
4.61464e-203	0.675635	0.954	0.556	1.54766e-198	CD14+MHCIIhigh monocyte	HLA-DRA
1.05409e-202	0.643259	0.504	0.165	3.53522e-198	CD14+MHCIIhigh monocyte	PIK3R5
2.31119e-202	0.652992	0.715	0.34	7.75127e-198	CD14+MHCIIhigh monocyte	TIMP1
5.18151e-202	0.613101	0.34	0.084	1.73778e-197	CD14+MHCIIhigh monocyte	IL1B
1.58384e-201	0.63552	0.829	0.512	5.31189e-197	CD14+MHCIIhigh monocyte	CD44
4.33204e-201	0.612223	0.475	0.157	1.45288e-196	CD14+MHCIIhigh monocyte	PRKAG2
3.79607e-199	0.671467	0.832	0.48	1.27313e-194	CD14+MHCIIhigh monocyte	ANXA1
2.86445e-196	0.596713	0.521	0.183	9.60681e-192	CD14+MHCIIhigh monocyte	FOSL2
5.66511e-195	-1.05315	0.033	0.541	1.89996e-190	CD14+MHCIIhigh monocyte	STMN1
9.25241e-192	0.544073	0.435	0.136	3.10307e-187	CD14+MHCIIhigh monocyte	TOM1
9.23167e-189	0.546712	0.379	0.104	3.09612e-184	CD14+MHCIIhigh monocyte	FGD4
1.40326e-188	0.720939	0.699	0.385	4.70625e-184	CD14+MHCIIhigh monocyte	HIF1A
1.45462e-187	0.625232	0.624	0.27	4.8785e-183	CD14+MHCIIhigh monocyte	PTPRE
4.00871e-186	-0.741661	0.421	0.766	1.34444e-181	CD14+MHCIIhigh monocyte	HSP90AB1
1.01439e-184	0.629537	0.55	0.21	3.40205e-180	CD14+MHCIIhigh monocyte	SAMSN1
3.90119e-183	0.661946	0.679	0.364	1.30838e-178	CD14+MHCIIhigh monocyte	VMP1
2.31676e-181	0.709195	0.631	0.313	7.76995e-177	CD14+MHCIIhigh monocyte	GPCPD1
7.8712e-180	0.62173	0.515	0.198	2.63984e-175	CD14+MHCIIhigh monocyte	IRAK3
9.90383e-179	0.598305	0.686	0.336	3.32155e-174	CD14+MHCIIhigh monocyte	FCGRT
4.69939e-178	-0.782551	0.263	0.67	1.57608e-173	CD14+MHCIIhigh monocyte	LDHB
1.6107e-175	0.617815	0.682	0.336	5.40197e-171	CD14+MHCIIhigh monocyte	GRN
2.10913e-173	0.601037	0.63	0.285	7.07359e-169	CD14+MHCIIhigh monocyte	AHNAK
1.18614e-170	0.59216	0.717	0.416	3.97808e-166	CD14+MHCIIhigh monocyte	APLP2
1.46249e-166	0.693765	0.66	0.36	4.90489e-162	CD14+MHCIIhigh monocyte	CTNNB1
2.28926e-166	-0.540814	0.661	0.837	7.67771e-162	CD14+MHCIIhigh monocyte	NPM1
3.71938e-166	0.597049	0.536	0.208	1.24741e-161	CD14+MHCIIhigh monocyte	NCF1
2.11468e-162	0.732025	0.666	0.385	7.0922e-158	CD14+MHCIIhigh monocyte	JARID2
8.02205e-162	0.536153	0.379	0.117	2.69044e-157	CD14+MHCIIhigh monocyte	DUSP6
2.29941e-159	0.659584	0.517	0.217	7.71176e-155	CD14+MHCIIhigh monocyte	ZSWIM6
5.012e-158	0.617269	0.67	0.372	1.68092e-153	CD14+MHCIIhigh monocyte	PICALM
2.34485e-157	0.557476	0.591	0.278	7.86417e-153	CD14+MHCIIhigh monocyte	C4orf48
1.6033e-156	-0.523833	0.593	0.846	5.37713e-152	CD14+MHCIIhigh monocyte	UBB
6.37424e-153	0.57096	0.688	0.366	2.13779e-148	CD14+MHCIIhigh monocyte	CTSD
1.65508e-152	0.600308	0.639	0.308	5.55082e-148	CD14+MHCIIhigh monocyte	ZFP36L1
1.16102e-151	0.621141	0.576	0.278	3.89384e-147	CD14+MHCIIhigh monocyte	MYO9B
3.55473e-151	0.507027	0.438	0.152	1.19219e-146	CD14+MHCIIhigh monocyte	GAS7
4.60471e-150	0.578174	0.813	0.545	1.54433e-145	CD14+MHCIIhigh monocyte	KLF6
3.69023e-149	0.552448	0.429	0.158	1.23763e-144	CD14+MHCIIhigh monocyte	DENND5A
2.20575e-148	0.506173	0.426	0.152	7.39765e-144	CD14+MHCIIhigh monocyte	NINJ1
1.50932e-147	0.569555	0.485	0.201	5.06195e-143	CD14+MHCIIhigh monocyte	KLF10
2.3763e-146	0.539573	0.714	0.416	7.96964e-142	CD14+MHCIIhigh monocyte	IQGAP1
2.48076e-146	-0.610871	0.382	0.736	8.31998e-142	CD14+MHCIIhigh monocyte	HMGN1
1.32025e-142	0.544071	0.526	0.231	4.42787e-138	CD14+MHCIIhigh monocyte	CARD16
1.92478e-141	-0.587536	0.605	0.827	6.45532e-137	CD14+MHCIIhigh monocyte	HSP90AA1
4.657e-141	0.54563	0.618	0.299	1.56186e-136	CD14+MHCIIhigh monocyte	MYO1F
2.49928e-136	0.574183	0.518	0.239	8.38209e-132	CD14+MHCIIhigh monocyte	FOXO3
4.47939e-136	0.549001	0.793	0.487	1.5023e-131	CD14+MHCIIhigh monocyte	JUND
4.07712e-135	0.507743	0.703	0.409	1.36738e-130	CD14+MHCIIhigh monocyte	RNF130
8.65663e-135	0.506614	0.495	0.212	2.90326e-130	CD14+MHCIIhigh monocyte	GLIPR2
6.53483e-134	0.524935	0.564	0.278	2.19165e-129	CD14+MHCIIhigh monocyte	ARRB2
1.41117e-133	0.546666	0.5	0.232	4.73279e-129	CD14+MHCIIhigh monocyte	PLSCR1
4.89769e-131	-0.78428	0.209	0.582	1.64259e-126	CD14+MHCIIhigh monocyte	TUBB
1.04245e-130	0.562951	0.791	0.531	3.49617e-126	CD14+MHCIIhigh monocyte	NFKBIA
4.93623e-130	-0.847065	0.074	0.471	1.65551e-125	CD14+MHCIIhigh monocyte	HIST1H4C
5.96042e-126	0.504729	0.848	0.596	1.999e-121	CD14+MHCIIhigh monocyte	PTPRC
1.92018e-124	-0.745607	0.347	0.65	6.43989e-120	CD14+MHCIIhigh monocyte	TUBA1B
7.18125e-124	0.592368	0.468	0.197	2.40845e-119	CD14+MHCIIhigh monocyte	PLCB1
7.30384e-124	0.52832	0.744	0.475	2.44956e-119	CD14+MHCIIhigh monocyte	STK17B
2.31318e-123	0.516309	0.617	0.334	7.75794e-119	CD14+MHCIIhigh monocyte	ANXA5
3.05287e-120	0.516843	0.495	0.234	1.02387e-115	CD14+MHCIIhigh monocyte	IFNGR2
5.42565e-120	0.502489	0.66	0.382	1.81965e-115	CD14+MHCIIhigh monocyte	PYCARD
9.26329e-120	0.62584	0.46	0.197	3.10672e-115	CD14+MHCIIhigh monocyte	TEX14
1.3019e-119	-0.624231	0.09	0.473	4.36632e-115	CD14+MHCIIhigh monocyte	NUCB2
2.6185e-119	0.513048	0.615	0.31	8.78192e-115	CD14+MHCIIhigh monocyte	FYB1
1.43451e-118	-0.650811	0.171	0.55	4.81105e-114	CD14+MHCIIhigh monocyte	GYPC
5.22639e-116	-0.578229	0.172	0.54	1.75283e-111	CD14+MHCIIhigh monocyte	PEBP1
1.51323e-115	0.52621	0.524	0.267	5.07507e-111	CD14+MHCIIhigh monocyte	TET2
3.16277e-113	0.523718	0.426	0.188	1.06073e-108	CD14+MHCIIhigh monocyte	ATP13A3
5.4504e-113	0.533105	0.528	0.247	1.82795e-108	CD14+MHCIIhigh monocyte	LRMDA
3.09786e-112	0.504817	0.643	0.405	1.03896e-107	CD14+MHCIIhigh monocyte	SDCBP
1.80122e-110	0.513858	0.541	0.279	6.04094e-106	CD14+MHCIIhigh monocyte	RNF149
4.76542e-110	-0.582156	0.312	0.652	1.59823e-105	CD14+MHCIIhigh monocyte	HSPA8
5.98016e-110	0.536008	0.544	0.262	2.00563e-105	CD14+MHCIIhigh monocyte	SLC2A3
7.81489e-109	0.521881	0.504	0.258	2.62096e-104	CD14+MHCIIhigh monocyte	BACH1
8.83611e-108	-0.62459	0.1	0.468	2.96345e-103	CD14+MHCIIhigh monocyte	HSPB1
2.17546e-107	0.501068	0.465	0.215	7.29606e-103	CD14+MHCIIhigh monocyte	SBF2
1.46873e-106	-0.623145	0.177	0.525	4.92584e-102	CD14+MHCIIhigh monocyte	HSPD1
3.19407e-106	0.503463	0.425	0.191	1.07123e-101	CD14+MHCIIhigh monocyte	AGFG1
1.39326e-105	0.513841	0.585	0.339	4.6727e-101	CD14+MHCIIhigh monocyte	USP3
1.28263e-100	0.537875	0.666	0.457	4.30168e-96	CD14+MHCIIhigh monocyte	MED13L
1.41366e-96	-0.53821	0.233	0.563	4.74114e-92	CD14+MHCIIhigh monocyte	NUCKS1
1.80093e-96	-0.527437	0.354	0.63	6.03995e-92	CD14+MHCIIhigh monocyte	RAN
2.03261e-95	0.543685	0.595	0.381	6.81698e-91	CD14+MHCIIhigh monocyte	ZFAND3
1.64939e-90	-0.576047	0.01	0.313	5.53171e-86	CD14+MHCIIhigh monocyte	PCLAF
5.1346e-87	-0.558731	0.17	0.48	1.72204e-82	CD14+MHCIIhigh monocyte	HMGA1
1.6288e-86	-0.544745	0.206	0.519	5.46268e-82	CD14+MHCIIhigh monocyte	DUT
4.99127e-83	-0.638432	0.124	0.442	1.67397e-78	CD14+MHCIIhigh monocyte	PRDX2
1.04965e-80	-0.59294	0.052	0.34	3.5203e-76	CD14+MHCIIhigh monocyte	CD69
2.02443e-80	-0.500986	0.065	0.363	6.78953e-76	CD14+MHCIIhigh monocyte	CDK6
1.91441e-76	-0.517259	0.013	0.281	6.42054e-72	CD14+MHCIIhigh monocyte	CTSW
2.07928e-63	-0.658379	0.08	0.327	6.9735e-59	CD14+MHCIIhigh monocyte	NKG7
4.58796e-52	-0.525895	0.012	0.208	1.53871e-47	CD14+MHCIIhigh monocyte	IGLL1
1.04477e-49	-0.542981	0.04	0.24	3.50396e-45	CD14+MHCIIhigh monocyte	IGHM
1.12656e-47	-0.544444	0.019	0.203	3.77825e-43	CD14+MHCIIhigh monocyte	IL32
3.47581e-42	-0.567259	0.034	0.206	1.16572e-37	CD14+MHCIIhigh monocyte	CCL5
0.00991378	-0.763205	0.201	0.233	1	CD14+MHCIIhigh monocyte	IGKC
0	2.02568	0.997	0.279	0	CD14+MHCIIlow monocyte	S100A9
0	1.99252	0.996	0.256	0	CD14+MHCIIlow monocyte	S100A8
0	1.89966	0.934	0.098	0	CD14+MHCIIlow monocyte	S100A12
0	1.54688	0.943	0.135	0	CD14+MHCIIlow monocyte	FCN1
0	1.52815	0.854	0.135	0	CD14+MHCIIlow monocyte	VCAN
0	1.50255	0.993	0.354	0	CD14+MHCIIlow monocyte	LYZ
0	1.28482	0.826	0.17	0	CD14+MHCIIlow monocyte	MNDA
0	1.2038	0.847	0.172	0	CD14+MHCIIlow monocyte	CSTA
0	1.14361	0.975	0.397	0	CD14+MHCIIlow monocyte	TYROBP
0	1.1091	0.719	0.287	0	CD14+MHCIIlow monocyte	NAMPT
0	1.0538	0.883	0.402	0	CD14+MHCIIlow monocyte	CTSS
0	1.0287	0.618	0.093	0	CD14+MHCIIlow monocyte	PLBD1
0	1.01565	0.629	0.064	0	CD14+MHCIIlow monocyte	CD14
0	1.00232	0.884	0.375	0	CD14+MHCIIlow monocyte	S100A11
0	0.980879	0.915	0.39	0	CD14+MHCIIlow monocyte	LST1
0	0.954227	0.611	0.133	0	CD14+MHCIIlow monocyte	RETN
0	0.947148	0.557	0.061	0	CD14+MHCIIlow monocyte	CDA
0	0.941342	0.534	0.088	0	CD14+MHCIIlow monocyte	PADI4
0	0.919511	0.996	0.704	0	CD14+MHCIIlow monocyte	S100A6
0	0.907413	0.922	0.463	0	CD14+MHCIIlow monocyte	LGALS1
0	0.890387	0.645	0.126	0	CD14+MHCIIlow monocyte	MS4A6A
0	0.886969	0.909	0.557	0	CD14+MHCIIlow monocyte	TSPO
0	0.884598	0.491	0.041	0	CD14+MHCIIlow monocyte	RBP7
0	0.879776	0.864	0.361	0	CD14+MHCIIlow monocyte	FCER1G
0	0.866882	0.582	0.151	0	CD14+MHCIIlow monocyte	PLAUR
0	0.862627	0.619	0.152	0	CD14+MHCIIlow monocyte	CYBB
0	0.833951	0.609	0.17	0	CD14+MHCIIlow monocyte	CSF3R
0	0.817503	0.535	0.069	0	CD14+MHCIIlow monocyte	SERPINA1
0	0.813741	0.471	0.042	0	CD14+MHCIIlow monocyte	FPR1
0	0.808002	0.484	0.075	0	CD14+MHCIIlow monocyte	SLC11A1
0	0.79591	0.474	0.078	0	CD14+MHCIIlow monocyte	LRRK2
0	0.785978	0.611	0.179	0	CD14+MHCIIlow monocyte	CFD
0	0.78561	0.493	0.119	0	CD14+MHCIIlow monocyte	MEGF9
0	0.782239	0.509	0.086	0	CD14+MHCIIlow monocyte	CLEC7A
0	0.731943	0.972	0.725	0	CD14+MHCIIlow monocyte	S100A4
0	0.726475	0.471	0.111	0	CD14+MHCIIlow monocyte	ACSL1
0	0.724318	0.544	0.135	0	CD14+MHCIIlow monocyte	CFP
0	0.694464	0.406	0.08	0	CD14+MHCIIlow monocyte	BCL2A1
0	0.692248	0.478	0.094	0	CD14+MHCIIlow monocyte	NCF2
0	0.679317	0.331	0.049	0	CD14+MHCIIlow monocyte	S100P
0	0.642014	0.436	0.078	0	CD14+MHCIIlow monocyte	ITGAM
0	0.63278	0.406	0.076	0	CD14+MHCIIlow monocyte	TMEM170B
0	0.616048	0.397	0.078	0	CD14+MHCIIlow monocyte	CKAP4
0	0.606329	0.367	0.044	0	CD14+MHCIIlow monocyte	C5AR1
0	0.603928	0.365	0.047	0	CD14+MHCIIlow monocyte	QPCT
0	0.599703	0.369	0.046	0	CD14+MHCIIlow monocyte	LILRA5
0	0.569485	0.34	0.038	0	CD14+MHCIIlow monocyte	DYSF
0	0.554494	0.267	0.019	0	CD14+MHCIIlow monocyte	FOLR3
0	0.536369	0.271	0.022	0	CD14+MHCIIlow monocyte	HP
0	0.516594	0.999	0.973	0	CD14+MHCIIlow monocyte	FTL
0	0.504516	0.264	0.031	0	CD14+MHCIIlow monocyte	VNN2
0	0.500304	0.297	0.035	0	CD14+MHCIIlow monocyte	TREM1
2.90375e-291	0.930233	0.567	0.158	9.7386e-287	CD14+MHCIIlow monocyte	AC020656.1
2.24169e-287	0.579194	0.393	0.084	7.51817e-283	CD14+MHCIIlow monocyte	BST1
2.33609e-286	0.764237	0.6	0.194	7.83477e-282	CD14+MHCIIlow monocyte	RAB31
2.22285e-284	0.642145	0.47	0.116	7.45498e-280	CD14+MHCIIlow monocyte	MPEG1
8.76905e-284	0.674753	0.518	0.139	2.94096e-279	CD14+MHCIIlow monocyte	FGR
1.48595e-280	0.808681	0.772	0.365	4.98358e-276	CD14+MHCIIlow monocyte	CTSD
1.5732e-271	0.777763	0.645	0.237	5.2762e-267	CD14+MHCIIlow monocyte	TYMP
1.44556e-268	0.845867	0.714	0.32	4.84811e-264	CD14+MHCIIlow monocyte	STXBP2
3.90183e-259	0.731882	0.544	0.165	1.30859e-254	CD14+MHCIIlow monocyte	CEBPD
2.32303e-258	0.762851	0.521	0.154	7.79097e-254	CD14+MHCIIlow monocyte	RBM47
6.76164e-257	-0.539537	0.758	0.947	2.26772e-252	CD14+MHCIIlow monocyte	RPS5
2.91454e-256	0.788422	0.901	0.48	9.77477e-252	CD14+MHCIIlow monocyte	CST3
5.1131e-256	0.763489	0.602	0.207	1.71483e-251	CD14+MHCIIlow monocyte	NCF1
1.6662e-254	-0.583203	0.702	0.94	5.58811e-250	CD14+MHCIIlow monocyte	RPSA
4.71989e-252	0.828455	0.667	0.26	1.58296e-247	CD14+MHCIIlow monocyte	SLC2A3
3.96843e-250	0.879262	0.646	0.255	1.33093e-245	CD14+MHCIIlow monocyte	ARHGAP26
3.561e-247	0.69577	0.857	0.523	1.19429e-242	CD14+MHCIIlow monocyte	PSAP
1.4531e-232	0.508055	0.321	0.066	4.87341e-228	CD14+MHCIIlow monocyte	TLR2
4.65528e-231	-0.773447	0.472	0.84	1.56129e-226	CD14+MHCIIlow monocyte	NPM1
1.09782e-230	0.640798	0.284	0.052	3.68189e-226	CD14+MHCIIlow monocyte	G0S2
5.37032e-230	0.606476	0.406	0.104	1.8011e-225	CD14+MHCIIlow monocyte	FGD4
1.48999e-227	0.602476	0.433	0.116	4.99713e-223	CD14+MHCIIlow monocyte	DMXL2
5.62183e-219	0.701182	0.81	0.423	1.88545e-214	CD14+MHCIIlow monocyte	COTL1
9.55139e-218	0.705677	0.297	0.06	3.20335e-213	CD14+MHCIIlow monocyte	CXCL8
5.06209e-216	0.579355	0.423	0.115	1.69772e-211	CD14+MHCIIlow monocyte	FGL2
2.49867e-215	0.563269	0.387	0.102	8.38004e-211	CD14+MHCIIlow monocyte	C19orf38
1.29339e-212	0.809799	0.602	0.24	4.33779e-208	CD14+MHCIIlow monocyte	PLXDC2
2.88947e-211	0.594678	0.931	0.693	9.69071e-207	CD14+MHCIIlow monocyte	SRGN
7.40574e-210	0.705732	0.661	0.316	2.48374e-205	CD14+MHCIIlow monocyte	VSIR
4.76564e-206	0.655813	0.843	0.481	1.5983e-201	CD14+MHCIIlow monocyte	AIF1
8.3595e-206	0.582758	0.399	0.112	2.80361e-201	CD14+MHCIIlow monocyte	MSRB1
1.80057e-205	0.672138	0.848	0.571	6.03874e-201	CD14+MHCIIlow monocyte	SAT1
1.63624e-204	0.622997	0.517	0.17	5.48761e-200	CD14+MHCIIlow monocyte	CD68
4.97953e-202	0.699687	0.824	0.48	1.67004e-197	CD14+MHCIIlow monocyte	ANXA1
1.71756e-198	-0.674282	0.465	0.849	5.76035e-194	CD14+MHCIIlow monocyte	UBB
5.73838e-198	0.724057	0.525	0.209	1.92454e-193	CD14+MHCIIlow monocyte	GCA
4.28053e-192	0.660432	0.55	0.21	1.4356e-187	CD14+MHCIIlow monocyte	SAMSN1
1.48903e-190	0.527351	0.946	0.711	4.99389e-186	CD14+MHCIIlow monocyte	VIM
6.37495e-189	0.639968	0.636	0.284	2.13803e-184	CD14+MHCIIlow monocyte	SPI1
1.92424e-186	0.671259	0.497	0.188	6.45352e-182	CD14+MHCIIlow monocyte	MXD1
3.06107e-186	0.79058	0.569	0.229	1.02662e-181	CD14+MHCIIlow monocyte	SIPA1L1
1.87457e-184	0.647955	0.704	0.416	6.28695e-180	CD14+MHCIIlow monocyte	APLP2
4.97564e-184	0.773025	0.643	0.311	1.66873e-179	CD14+MHCIIlow monocyte	DPYD
3.0329e-183	0.646824	0.511	0.198	1.01717e-178	CD14+MHCIIlow monocyte	IRAK3
4.31743e-182	0.595579	0.788	0.546	1.44798e-177	CD14+MHCIIlow monocyte	TKT
6.29621e-181	-0.998934	0.053	0.541	2.11162e-176	CD14+MHCIIlow monocyte	STMN1
8.52116e-180	0.676185	0.849	0.61	2.85783e-175	CD14+MHCIIlow monocyte	NEAT1
2.77626e-179	0.657431	0.667	0.354	9.31102e-175	CD14+MHCIIlow monocyte	AP1S2
1.21186e-176	-0.792155	0.234	0.67	4.06433e-172	CD14+MHCIIlow monocyte	LDHB
3.40339e-176	0.594295	0.497	0.187	1.14143e-171	CD14+MHCIIlow monocyte	TNFSF13B
1.67316e-175	0.630126	0.607	0.275	5.61146e-171	CD14+MHCIIlow monocyte	CAPG
5.21256e-172	-0.529332	0.643	0.896	1.74819e-167	CD14+MHCIIlow monocyte	HNRNPA1
3.31948e-166	0.671267	0.587	0.261	1.11329e-161	CD14+MHCIIlow monocyte	RGS2
8.76001e-166	0.652396	0.479	0.187	2.93793e-161	CD14+MHCIIlow monocyte	BASP1
2.16184e-165	0.530923	0.358	0.103	7.25039e-161	CD14+MHCIIlow monocyte	KYNU
1.25446e-163	0.51471	0.414	0.134	4.2072e-159	CD14+MHCIIlow monocyte	HCK
7.56899e-161	-0.700868	0.406	0.766	2.53849e-156	CD14+MHCIIlow monocyte	HSP90AB1
1.58924e-159	-0.873389	0.255	0.652	5.33001e-155	CD14+MHCIIlow monocyte	TUBA1B
2.03251e-159	0.547516	0.416	0.14	6.81663e-155	CD14+MHCIIlow monocyte	KLF4
3.15905e-159	0.530557	0.414	0.14	1.05948e-154	CD14+MHCIIlow monocyte	PRAM1
2.24199e-158	0.506583	0.35	0.104	7.51918e-154	CD14+MHCIIlow monocyte	WDFY3
1.5314e-157	0.608575	0.644	0.33	5.13599e-153	CD14+MHCIIlow monocyte	SELL
1.58739e-157	0.656604	0.58	0.279	5.32377e-153	CD14+MHCIIlow monocyte	AGTPBP1
1.53919e-156	-0.512088	0.664	0.878	5.16213e-152	CD14+MHCIIlow monocyte	EEF1B2
2.14671e-153	0.619349	0.641	0.337	7.19963e-149	CD14+MHCIIlow monocyte	GRN
8.78823e-149	-0.536303	0.535	0.827	2.9474e-144	CD14+MHCIIlow monocyte	HINT1
1.1204e-148	-0.676069	0.096	0.541	3.7576e-144	CD14+MHCIIlow monocyte	PEBP1
1.22464e-142	-0.642278	0.166	0.604	4.10721e-138	CD14+MHCIIlow monocyte	SOD1
1.61817e-142	0.60869	0.571	0.301	5.42702e-138	CD14+MHCIIlow monocyte	FBXL5
1.59572e-140	0.571519	0.658	0.432	5.35172e-136	CD14+MHCIIlow monocyte	METTL9
3.04199e-140	-0.511254	0.692	0.876	1.02022e-135	CD14+MHCIIlow monocyte	HMGB1
3.93284e-140	-0.714145	0.121	0.551	1.31899e-135	CD14+MHCIIlow monocyte	GYPC
9.65687e-139	0.654555	0.517	0.231	3.23872e-134	CD14+MHCIIlow monocyte	GAB2
1.55404e-138	0.590884	0.523	0.244	5.21195e-134	CD14+MHCIIlow monocyte	BRI3
3.15171e-138	0.591121	0.628	0.369	1.05702e-133	CD14+MHCIIlow monocyte	ASAH1
1.38629e-136	0.542806	0.421	0.158	4.64933e-132	CD14+MHCIIlow monocyte	JAML
3.45776e-136	0.561258	0.655	0.382	1.15966e-131	CD14+MHCIIlow monocyte	PYCARD
7.28401e-136	0.57668	0.593	0.299	2.44291e-131	CD14+MHCIIlow monocyte	MYO1F
1.32484e-134	0.551809	0.479	0.21	4.44326e-130	CD14+MHCIIlow monocyte	AGTRAP
1.74013e-134	0.543053	0.486	0.212	5.83606e-130	CD14+MHCIIlow monocyte	GLIPR2
9.60864e-134	-0.790851	0.201	0.582	3.22255e-129	CD14+MHCIIlow monocyte	TUBB
7.21889e-133	-0.654898	0.151	0.564	2.42107e-128	CD14+MHCIIlow monocyte	NUCKS1
3.68877e-132	-0.656969	0.253	0.653	1.23714e-127	CD14+MHCIIlow monocyte	HSPA8
4.3514e-131	0.591328	0.813	0.573	1.45937e-126	CD14+MHCIIlow monocyte	FOS
4.56425e-129	0.524649	0.424	0.17	1.53076e-124	CD14+MHCIIlow monocyte	IL17RA
4.96568e-129	0.590089	0.661	0.377	1.66539e-124	CD14+MHCIIlow monocyte	LYN
1.57551e-125	0.572411	0.731	0.441	5.28393e-121	CD14+MHCIIlow monocyte	S100A10
2.62026e-125	-0.617892	0.313	0.676	8.78781e-121	CD14+MHCIIlow monocyte	NCL
4.02792e-125	-0.562332	0.388	0.736	1.35088e-120	CD14+MHCIIlow monocyte	HMGN1
1.38261e-124	0.53394	0.666	0.417	4.63699e-120	CD14+MHCIIlow monocyte	IQGAP1
2.00288e-122	-0.633855	0.21	0.602	6.71727e-118	CD14+MHCIIlow monocyte	CALR
6.68995e-120	0.569371	0.651	0.422	2.24368e-115	CD14+MHCIIlow monocyte	MCL1
9.77703e-120	0.544815	0.577	0.315	3.27902e-115	CD14+MHCIIlow monocyte	EVI2B
1.82605e-119	-0.619186	0.081	0.473	6.1242e-115	CD14+MHCIIlow monocyte	NUCB2
3.36347e-118	0.590854	0.608	0.374	1.12804e-113	CD14+MHCIIlow monocyte	PICALM
2.40093e-117	0.535744	0.499	0.248	8.05223e-113	CD14+MHCIIlow monocyte	NUP214
8.05106e-115	0.595504	0.612	0.373	2.70016e-110	CD14+MHCIIlow monocyte	QKI
8.71735e-115	0.539419	0.566	0.293	2.92363e-110	CD14+MHCIIlow monocyte	LYST
9.59502e-114	0.506704	0.533	0.258	3.21798e-109	CD14+MHCIIlow monocyte	C1orf162
1.96281e-113	0.541331	0.43	0.191	6.58286e-109	CD14+MHCIIlow monocyte	AGFG1
2.2663e-110	-0.586377	0.289	0.631	7.60071e-106	CD14+MHCIIlow monocyte	RAN
3.24854e-110	0.573581	0.467	0.23	1.0895e-105	CD14+MHCIIlow monocyte	IVNS1ABP
6.99183e-108	0.505785	0.653	0.385	2.34492e-103	CD14+MHCIIlow monocyte	ITGB2
7.57766e-107	-0.575548	0.133	0.506	2.5414e-102	CD14+MHCIIlow monocyte	RANBP1
3.25775e-106	0.544005	0.527	0.267	1.09258e-101	CD14+MHCIIlow monocyte	FNDC3B
1.2997e-104	0.674527	0.575	0.357	4.35894e-100	CD14+MHCIIlow monocyte	ATP2B1
3.26335e-102	0.540623	0.554	0.324	1.09446e-97	CD14+MHCIIlow monocyte	CD55
5.62509e-101	-0.548671	0.079	0.426	1.88654e-96	CD14+MHCIIlow monocyte	NASP
3.58023e-100	0.506455	0.448	0.209	1.20074e-95	CD14+MHCIIlow monocyte	CEBPB
2.29966e-99	-0.53441	0.161	0.518	7.7126e-95	CD14+MHCIIlow monocyte	PA2G4
9.66045e-99	0.588604	0.541	0.315	3.23992e-94	CD14+MHCIIlow monocyte	GPCPD1
2.69503e-98	-0.684383	0.091	0.443	9.03858e-94	CD14+MHCIIlow monocyte	PRDX2
1.39723e-97	0.541476	0.726	0.532	4.68602e-93	CD14+MHCIIlow monocyte	ZEB2
3.98162e-97	0.504077	0.505	0.279	1.33536e-92	CD14+MHCIIlow monocyte	C4orf48
2.35966e-96	0.520313	0.566	0.34	7.91384e-92	CD14+MHCIIlow monocyte	USP3
5.13141e-96	0.514331	0.496	0.282	1.72097e-91	CD14+MHCIIlow monocyte	PGD
7.90467e-95	-0.643519	0.023	0.341	2.65107e-90	CD14+MHCIIlow monocyte	CD69
3.78714e-94	-0.718912	0.139	0.47	1.27013e-89	CD14+MHCIIlow monocyte	HIST1H4C
7.95245e-94	0.568031	0.514	0.313	2.66709e-89	CD14+MHCIIlow monocyte	LTA4H
1.18045e-90	0.530373	0.518	0.303	3.959e-86	CD14+MHCIIlow monocyte	ASAP1
2.88513e-90	0.500808	0.45	0.235	9.67614e-86	CD14+MHCIIlow monocyte	IFNGR2
4.31954e-90	-0.552157	0.19	0.52	1.44869e-85	CD14+MHCIIlow monocyte	DUT
7.60834e-90	0.526451	0.484	0.247	2.55168e-85	CD14+MHCIIlow monocyte	LRMDA
1.24461e-85	-0.512833	0.052	0.363	4.17416e-81	CD14+MHCIIlow monocyte	CDK6
1.80948e-85	0.533679	0.58	0.387	6.06864e-81	CD14+MHCIIlow monocyte	HIF1A
9.85568e-82	-0.539887	0.184	0.48	3.3054e-77	CD14+MHCIIlow monocyte	HMGA1
4.63539e-80	-0.528521	0.006	0.281	1.55462e-75	CD14+MHCIIlow monocyte	CTSW
4.68504e-80	-0.536595	0.029	0.313	1.57127e-75	CD14+MHCIIlow monocyte	PCLAF
2.97131e-65	-0.52165	0.245	0.514	9.96517e-61	CD14+MHCIIlow monocyte	HLA-DPB1
3.95951e-52	-0.566555	0.009	0.203	1.32794e-47	CD14+MHCIIlow monocyte	IL32
3.40237e-48	-0.595831	0.02	0.206	1.14109e-43	CD14+MHCIIlow monocyte	CCL5
1.36103e-47	-0.500994	0.021	0.208	4.56461e-43	CD14+MHCIIlow monocyte	IGLL1
9.04931e-44	-0.511153	0.053	0.239	3.03496e-39	CD14+MHCIIlow monocyte	IGHM
1.93599e-13	-1.10086	0.245	0.359	6.49292e-09	CD14+MHCIIlow monocyte	HBB
3.40163e-08	-0.831815	0.159	0.234	0.00114084	CD14+MHCIIlow monocyte	IGKC
0	1.52711	0.886	0.053	0	CD16+ monocyte	FCGR3A
0	1.51601	0.929	0.062	0	CD16+ monocyte	SERPINA1
0	1.50603	0.991	0.389	0	CD16+ monocyte	LST1
0	1.36311	0.993	0.4	0	CD16+ monocyte	CTSS
0	1.29151	0.912	0.283	0	CD16+ monocyte	NAMPT
0	1.28977	0.983	0.42	0	CD16+ monocyte	COTL1
0	1.27866	0.987	0.359	0	CD16+ monocyte	FCER1G
0	1.27844	0.805	0.055	0	CD16+ monocyte	MS4A7
0	1.27066	0.939	0.372	0	CD16+ monocyte	LYN
0	1.2455	0.899	0.24	0	CD16+ monocyte	IFITM3
0	1.24502	0.998	0.478	0	CD16+ monocyte	AIF1
0	1.24207	0.783	0.034	0	CD16+ monocyte	SMIM25
0	1.24135	0.891	0.174	0	CD16+ monocyte	CFD
0	1.23629	0.868	0.137	0	CD16+ monocyte	FCN1
0	1.22762	0.997	0.396	0	CD16+ monocyte	TYROBP
0	1.2071	0.753	0.124	0	CD16+ monocyte	TCF7L2
0	1.192	0.996	0.569	0	CD16+ monocyte	SAT1
0	1.17983	0.982	0.373	0	CD16+ monocyte	S100A11
0	1.10504	0.987	0.608	0	CD16+ monocyte	NEAT1
0	1.08781	0.762	0.081	0	CD16+ monocyte	CLEC7A
0	1.081	0.87	0.232	0	CD16+ monocyte	TYMP
0	1.07217	0.981	0.52	0	CD16+ monocyte	PSAP
0	1.04261	0.993	0.478	0	CD16+ monocyte	CST3
0	1.04196	0.699	0.123	0	CD16+ monocyte	FAM49A
0	1.02696	0.725	0.075	0	CD16+ monocyte	PILRA
0	1.02137	0.732	0.152	0	CD16+ monocyte	WARS
0	1.01479	0.781	0.169	0	CD16+ monocyte	TNFRSF1B
0	1.0058	0.807	0.165	0	CD16+ monocyte	CD68
0	0.999032	0.699	0.155	0	CD16+ monocyte	MTSS1
0	0.995154	0.874	0.337	0	CD16+ monocyte	TIMP1
0	0.98907	0.657	0.039	0	CD16+ monocyte	C5AR1
0	0.986661	0.868	0.317	0	CD16+ monocyte	STXBP2
0	0.983811	0.681	0.097	0	CD16+ monocyte	CD86
0	0.977291	0.865	0.279	0	CD16+ monocyte	SPI1
0	0.975594	0.679	0.055	0	CD16+ monocyte	LILRB2
0	0.974875	0.885	0.364	0	CD16+ monocyte	ASAH1
0	0.967621	0.95	0.498	0	CD16+ monocyte	IFITM2
0	0.96642	0.606	0.043	0	CD16+ monocyte	CDKN1C
0	0.958421	0.643	0.145	0	CD16+ monocyte	SLC8A1
0	0.95102	0.716	0.128	0	CD16+ monocyte	HCK
0	0.936501	0.675	0.075	0	CD16+ monocyte	BCL2A1
0	0.923767	0.609	0.078	0	CD16+ monocyte	IFI30
0	0.921682	0.622	0.041	0	CD16+ monocyte	LILRA5
0	0.914595	0.741	0.191	0	CD16+ monocyte	RHOC
0	0.900407	0.743	0.195	0	CD16+ monocyte	PECAM1
0	0.895046	0.723	0.207	0	CD16+ monocyte	SAMSN1
0	0.884709	0.634	0.059	0	CD16+ monocyte	LRRC25
0	0.874948	0.838	0.313	0	CD16+ monocyte	VSIR
0	0.863623	0.664	0.161	0	CD16+ monocyte	CD83
0	0.862578	0.707	0.136	0	CD16+ monocyte	FGR
0	0.862067	0.593	0.056	0	CD16+ monocyte	MAFB
0	0.85544	0.676	0.133	0	CD16+ monocyte	CFP
0	0.843599	0.742	0.275	0	CD16+ monocyte	RNF149
0	0.83678	0.673	0.182	0	CD16+ monocyte	TBXAS1
0	0.836685	0.717	0.203	0	CD16+ monocyte	CEBPB
0	0.831963	0.606	0.073	0	CD16+ monocyte	SLC11A1
0	0.814901	0.58	0.056	0	CD16+ monocyte	HMOX1
0	0.813553	0.619	0.111	0	CD16+ monocyte	FGL2
0	0.811568	0.985	0.704	0	CD16+ monocyte	S100A6
0	0.811246	0.92	0.485	0	CD16+ monocyte	NPC2
0	0.811217	0.572	0.047	0	CD16+ monocyte	CXCL16
0	0.810823	0.99	0.725	0	CD16+ monocyte	S100A4
0	0.794487	0.552	0.089	0	CD16+ monocyte	RNF144B
0	0.788978	0.629	0.15	0	CD16+ monocyte	PLAUR
0	0.788157	0.764	0.313	0	CD16+ monocyte	BID
0	0.785147	0.597	0.166	0	CD16+ monocyte	GRK3
0	0.775892	1	0.973	0	CD16+ monocyte	FTL
0	0.761935	0.704	0.228	0	CD16+ monocyte	CARD16
0	0.744248	0.777	0.311	0	CD16+ monocyte	EVI2B
0	0.735858	0.571	0.162	0	CD16+ monocyte	DOCK5
0	0.733653	0.477	0.058	0	CD16+ monocyte	TBC1D8
0	0.732731	0.596	0.155	0	CD16+ monocyte	POU2F2
0	0.730303	0.539	0.067	0	CD16+ monocyte	SLC7A7
0	0.724828	0.462	0.01	0	CD16+ monocyte	HES4
0	0.721775	0.598	0.152	0	CD16+ monocyte	NAAA
0	0.720899	0.943	0.589	0	CD16+ monocyte	EMP3
0	0.718416	0.536	0.082	0	CD16+ monocyte	CSF1R
0	0.714843	0.519	0.1	0	CD16+ monocyte	KYNU
0	0.707589	0.382	0.05	0	CD16+ monocyte	G0S2
0	0.70441	0.535	0.109	0	CD16+ monocyte	CLEC12A
0	0.69771	1	0.963	0	CD16+ monocyte	FTH1
0	0.677398	0.596	0.152	0	CD16+ monocyte	CYBB
0	0.675204	0.398	0.042	0	CD16+ monocyte	PAPSS2
0	0.664366	0.662	0.176	0	CD16+ monocyte	CSTA
0	0.662748	0.258	0.001	0	CD16+ monocyte	LYPD2
0	0.661252	0.515	0.093	0	CD16+ monocyte	NCF2
0	0.65146	0.45	0.065	0	CD16+ monocyte	EPB41L3
0	0.64904	0.543	0.12	0	CD16+ monocyte	STX11
0	0.645634	0.477	0.059	0	CD16+ monocyte	ITGAX
0	0.629109	0.514	0.1	0	CD16+ monocyte	C19orf38
0	0.620419	0.499	0.114	0	CD16+ monocyte	SLC43A2
0	0.61037	0.482	0.107	0	CD16+ monocyte	2023-03-01
0	0.60093	0.345	0.016	0	CD16+ monocyte	APOBEC3A
0	0.591132	0.462	0.084	0	CD16+ monocyte	ABI3
0	0.581437	0.289	0.004	0	CD16+ monocyte	VMO1
0	0.579903	0.403	0.025	0	CD16+ monocyte	LILRA1
0	0.568947	0.411	0.061	0	CD16+ monocyte	ADGRE2
0	0.559195	0.377	0.017	0	CD16+ monocyte	CD300E
0	0.548332	0.378	0.035	0	CD16+ monocyte	SIGLEC10
0	0.53522	0.431	0.087	0	CD16+ monocyte	SNX18
0	0.532074	0.366	0.046	0	CD16+ monocyte	LILRB1
0	0.521027	0.258	0.024	0	CD16+ monocyte	C1QA
0	0.519309	0.34	0.012	0	CD16+ monocyte	ZNF703
0	0.50766	0.417	0.082	0	CD16+ monocyte	HOTAIRM1
0	0.503625	0.388	0.051	0	CD16+ monocyte	CD300LF
1.89089e-303	0.818879	0.934	0.513	6.34167e-299	CD16+ monocyte	CD52
2.40916e-301	0.752649	0.683	0.241	8.07984e-297	CD16+ monocyte	BRI3
5.54643e-300	0.737162	0.837	0.394	1.86016e-295	CD16+ monocyte	RNASET2
1.21889e-296	0.599136	0.487	0.115	4.08792e-292	CD16+ monocyte	DMXL2
1.41031e-296	0.889794	0.666	0.227	4.72991e-292	CD16+ monocyte	SIPA1L1
2.1682e-294	0.646507	0.587	0.164	7.27172e-290	CD16+ monocyte	LGALS3
1.98965e-288	0.690885	0.716	0.275	6.67288e-284	CD16+ monocyte	ARRB2
1.14584e-287	0.70276	0.72	0.254	3.84291e-283	CD16+ monocyte	C1orf162
5.51264e-287	0.617751	0.536	0.146	1.84883e-282	CD16+ monocyte	CASP1
1.95545e-283	0.736414	0.758	0.296	6.55818e-279	CD16+ monocyte	MYO1F
6.48486e-283	0.763874	0.752	0.289	2.17489e-278	CD16+ monocyte	LYST
2.00284e-277	0.654747	0.827	0.283	6.71714e-273	CD16+ monocyte	S100A9
1.16752e-276	0.572889	0.503	0.134	3.91564e-272	CD16+ monocyte	C9orf72
3.41584e-274	0.583024	0.46	0.108	1.14561e-269	CD16+ monocyte	AC022217.3
8.54718e-271	0.705933	0.656	0.236	2.86655e-266	CD16+ monocyte	NFKBIZ
6.72007e-266	0.722569	0.934	0.595	2.25378e-261	CD16+ monocyte	PTPRC
1.02165e-265	0.767166	0.684	0.276	3.42642e-261	CD16+ monocyte	MYO9B
4.18081e-262	0.695697	0.643	0.237	1.40216e-257	CD16+ monocyte	RIN3
5.16107e-262	0.791577	0.967	0.462	1.73092e-257	CD16+ monocyte	LGALS1
6.44957e-258	0.53384	0.434	0.103	2.16306e-253	CD16+ monocyte	FGD4
1.26396e-257	0.750208	0.697	0.288	4.23907e-253	CD16+ monocyte	SMAP2
1.76222e-256	0.787105	0.631	0.229	5.91015e-252	CD16+ monocyte	GAB2
7.95985e-253	0.523353	0.463	0.117	2.66957e-248	CD16+ monocyte	MPEG1
5.54669e-251	0.679342	0.698	0.259	1.86025e-246	CD16+ monocyte	RGS2
9.26748e-250	0.671019	0.84	0.477	3.10813e-245	CD16+ monocyte	PTP4A2
1.9357e-249	0.572944	0.544	0.167	6.49195e-245	CD16+ monocyte	THEMIS2
6.65208e-249	0.613452	0.519	0.163	2.23098e-244	CD16+ monocyte	CPPED1
8.61835e-249	0.643198	0.521	0.161	2.89042e-244	CD16+ monocyte	EVI5
4.63049e-244	0.66377	0.8	0.379	1.55297e-239	CD16+ monocyte	PYCARD
1.44734e-241	0.673674	0.939	0.597	4.8541e-237	CD16+ monocyte	DUSP1
8.27879e-239	0.787082	0.882	0.529	2.77654e-234	CD16+ monocyte	ZEB2
1.27537e-236	0.665098	0.714	0.327	4.27732e-232	CD16+ monocyte	ZFAND5
5.58239e-236	0.7426	0.737	0.362	1.87222e-231	CD16+ monocyte	VMP1
9.97432e-236	0.646505	0.794	0.405	3.34519e-231	CD16+ monocyte	CMTM6
1.355e-234	0.605541	0.508	0.156	4.54439e-230	CD16+ monocyte	DENND5A
1.91539e-234	0.621826	0.618	0.232	6.42382e-230	CD16+ monocyte	IFNGR2
2.02692e-233	0.64997	0.494	0.146	6.79789e-229	CD16+ monocyte	RAP1GAP2
3.00966e-233	0.66721	0.567	0.197	1.00938e-228	CD16+ monocyte	IRAK3
9.52774e-233	0.661145	0.571	0.197	3.19541e-228	CD16+ monocyte	MAP3K1
5.73211e-232	-0.960426	0.167	0.672	1.92244e-227	CD16+ monocyte	LDHB
1.14724e-229	0.561681	0.501	0.151	3.84761e-225	CD16+ monocyte	NINJ1
5.21881e-229	0.634441	0.68	0.284	1.75028e-224	CD16+ monocyte	VASP
1.39465e-227	0.57098	0.502	0.159	4.67739e-223	CD16+ monocyte	NOTCH2
1.13554e-223	0.753685	0.737	0.353	3.80837e-219	CD16+ monocyte	ATP2B1
7.8997e-223	0.681789	0.879	0.484	2.6494e-218	CD16+ monocyte	HLA-DPA1
9.66213e-223	0.627004	0.686	0.295	3.24048e-218	CD16+ monocyte	PTPN6
5.42054e-222	0.706838	0.717	0.318	1.81794e-217	CD16+ monocyte	MT2A
2.78649e-221	0.636378	0.882	0.582	9.34533e-217	CD16+ monocyte	LRRFIP1
2.97457e-220	0.580606	0.906	0.356	9.9761e-216	CD16+ monocyte	LYZ
1.12343e-218	0.549333	0.423	0.115	3.76776e-214	CD16+ monocyte	EMILIN2
1.16873e-218	0.664339	0.64	0.263	3.91969e-214	CD16+ monocyte	STK10
9.48346e-216	0.611736	0.651	0.249	3.18056e-211	CD16+ monocyte	CYTIP
3.78086e-215	0.526293	0.477	0.138	1.26802e-210	CD16+ monocyte	KLF4
3.38493e-214	0.512372	0.434	0.124	1.13524e-209	CD16+ monocyte	UNC119
8.7611e-213	0.537035	0.416	0.11	2.9383e-208	CD16+ monocyte	AP003086.2
1.6459e-211	0.566975	0.572	0.194	5.52003e-207	CD16+ monocyte	RAB31
3.49143e-208	0.556093	0.386	0.102	1.17096e-203	CD16+ monocyte	PPM1L
3.73293e-208	0.668938	0.568	0.213	1.25195e-203	CD16+ monocyte	SBF2
5.66267e-208	0.551698	0.554	0.19	1.89915e-203	CD16+ monocyte	MYO1G
3.0427e-205	0.695421	0.585	0.226	1.02046e-200	CD16+ monocyte	RAPGEF1
9.39819e-203	0.572418	0.982	0.692	3.15197e-198	CD16+ monocyte	SRGN
9.9946e-203	-0.600714	0.675	0.836	3.35199e-198	CD16+ monocyte	NPM1
6.56399e-202	0.582589	0.431	0.125	2.20143e-197	CD16+ monocyte	FRY
1.38332e-199	0.549516	0.528	0.172	4.63938e-195	CD16+ monocyte	RHOB
5.08713e-198	0.64463	0.752	0.39	1.70612e-193	CD16+ monocyte	LY6E
8.10019e-196	0.647504	0.665	0.291	2.71664e-191	CD16+ monocyte	GNG2
2.0697e-191	0.599266	0.697	0.348	6.94135e-187	CD16+ monocyte	JPT1
1.2054e-190	0.639904	0.868	0.438	4.04269e-186	CD16+ monocyte	S100A10
1.67691e-189	0.551586	0.491	0.162	5.62402e-185	CD16+ monocyte	SLCO3A1
2.49019e-189	0.598288	0.786	0.444	8.35161e-185	CD16+ monocyte	CSTB
3.35585e-189	0.593381	0.709	0.332	1.12548e-184	CD16+ monocyte	ANXA5
1.47741e-188	0.597388	0.787	0.382	4.95494e-184	CD16+ monocyte	ITGB2
3.84771e-188	0.557129	0.813	0.516	1.29045e-183	CD16+ monocyte	PRELID1
4.51688e-186	-0.527662	0.744	0.875	1.51487e-181	CD16+ monocyte	HMGB1
1.13425e-184	0.55465	0.502	0.165	3.80405e-180	CD16+ monocyte	PIK3R5
2.09154e-184	0.622643	0.818	0.474	7.0146e-180	CD16+ monocyte	STK17B
4.65734e-184	0.58337	0.538	0.196	1.56198e-179	CD16+ monocyte	PAG1
8.93943e-184	0.592702	0.785	0.345	2.9981e-179	CD16+ monocyte	ANXA2
1.42127e-183	-1.00888	0.052	0.541	4.76666e-179	CD16+ monocyte	STMN1
1.54001e-183	0.507956	0.508	0.177	5.16489e-179	CD16+ monocyte	PIK3AP1
8.3143e-179	0.518967	0.502	0.165	2.78845e-174	CD16+ monocyte	CEBPD
1.57179e-178	0.568947	0.725	0.399	5.27146e-174	CD16+ monocyte	RHOG
9.73707e-178	-0.771473	0.102	0.59	3.26562e-173	CD16+ monocyte	CD99
9.4328e-175	0.592721	0.87	0.482	3.16357e-170	CD16+ monocyte	HLA-DRB1
3.62307e-172	0.644317	0.592	0.24	1.2151e-167	CD16+ monocyte	PLXDC2
2.70727e-171	0.572796	0.918	0.602	9.07966e-167	CD16+ monocyte	JUNB
9.66076e-170	0.548844	0.496	0.174	3.24002e-165	CD16+ monocyte	PTPRJ
3.90121e-169	0.536318	0.494	0.187	1.30839e-164	CD16+ monocyte	MBD2
1.24573e-168	0.560757	0.514	0.191	4.17792e-164	CD16+ monocyte	MCTP1
2.02894e-168	0.558335	0.725	0.351	6.80467e-164	CD16+ monocyte	CD48
4.55429e-168	0.600607	0.665	0.323	1.52742e-163	CD16+ monocyte	DOCK2
3.1061e-167	0.569638	0.702	0.354	1.04172e-162	CD16+ monocyte	AP1S2
1.95982e-166	0.667251	0.722	0.385	6.57285e-162	CD16+ monocyte	UTRN
4.33417e-166	0.558984	0.808	0.5	1.45359e-161	CD16+ monocyte	ARPC1B
1.65261e-162	0.511086	0.521	0.217	5.54252e-158	CD16+ monocyte	MAPKAPK3
7.13344e-162	0.501562	0.464	0.158	2.39241e-157	CD16+ monocyte	NEDD9
3.2107e-160	0.587754	0.551	0.238	1.0768e-155	CD16+ monocyte	FOXO3
1.18972e-158	0.543487	0.612	0.264	3.99007e-154	CD16+ monocyte	ADGRE5
5.64157e-157	0.540843	0.527	0.226	1.89207e-152	CD16+ monocyte	CACUL1
6.51826e-156	-0.604696	0.422	0.735	2.18609e-151	CD16+ monocyte	HMGN1
7.33876e-155	0.52059	0.862	0.625	2.46127e-150	CD16+ monocyte	RAP1B
6.20281e-154	0.508061	0.595	0.262	2.0803e-149	CD16+ monocyte	FMNL1
8.23622e-151	0.500029	0.603	0.277	2.76227e-146	CD16+ monocyte	C4orf48
1.36988e-150	0.554898	0.817	0.532	4.5943e-146	CD16+ monocyte	CELF2
3.11104e-150	0.504621	0.614	0.292	1.04338e-145	CD16+ monocyte	CHCHD10
1.80904e-148	0.533466	0.576	0.265	6.06715e-144	CD16+ monocyte	RNF13
2.67955e-148	0.515498	0.733	0.416	8.98669e-144	CD16+ monocyte	BLOC1S1
6.09794e-147	0.542894	0.665	0.309	2.04513e-142	CD16+ monocyte	FYB1
2.77077e-146	0.514951	0.818	0.512	9.29262e-142	CD16+ monocyte	CD44
2.24002e-144	0.600971	0.732	0.413	7.51258e-140	CD16+ monocyte	PRKCB
9.71477e-144	0.580369	0.697	0.397	3.25814e-139	CD16+ monocyte	DOCK8
3.37745e-142	0.50272	0.506	0.205	1.13273e-137	CD16+ monocyte	LCP2
8.66627e-142	0.59154	0.668	0.372	2.9065e-137	CD16+ monocyte	QKI
8.27898e-140	0.5558	0.515	0.217	2.7766e-135	CD16+ monocyte	ZSWIM6
1.01834e-139	0.544651	0.587	0.256	3.4153e-135	CD16+ monocyte	CRIP1
1.69061e-139	0.51079	0.517	0.2	5.66998e-135	CD16+ monocyte	AOAH
3.09011e-138	0.506755	0.477	0.196	1.03636e-133	CD16+ monocyte	PSEN1
2.86614e-137	0.530282	0.869	0.618	9.61245e-133	CD16+ monocyte	TXNIP
6.0354e-137	0.554655	0.958	0.556	2.02415e-132	CD16+ monocyte	HLA-DRA
9.25134e-133	0.595546	0.541	0.254	3.10271e-128	CD16+ monocyte	SNX9
2.87549e-131	-0.654313	0.073	0.473	9.64382e-127	CD16+ monocyte	NUCB2
2.19194e-128	-0.795545	0.079	0.471	7.35131e-124	CD16+ monocyte	HIST1H4C
3.74083e-128	0.524493	0.656	0.352	1.2546e-123	CD16+ monocyte	TLE4
3.3295e-125	0.508377	0.582	0.311	1.11665e-120	CD16+ monocyte	LTA4H
1.54533e-124	0.551677	0.567	0.29	5.18272e-120	CD16+ monocyte	NCOA2
2.20523e-116	-0.626959	0.182	0.55	7.39591e-112	CD16+ monocyte	GYPC
4.69679e-113	-0.65703	0.128	0.481	1.57521e-108	CD16+ monocyte	HMGA1
4.34732e-109	0.524457	0.628	0.373	1.45801e-104	CD16+ monocyte	PICALM
4.57843e-109	-0.545834	0.197	0.539	1.53551e-104	CD16+ monocyte	PEBP1
1.62865e-107	-0.544117	0.312	0.613	5.46216e-103	CD16+ monocyte	TXN
7.66425e-106	0.537117	0.59	0.312	2.57044e-101	CD16+ monocyte	DPYD
2.27996e-105	0.514751	0.676	0.413	7.64652e-101	CD16+ monocyte	SSH2
2.70271e-105	0.531113	0.692	0.456	9.06435e-101	CD16+ monocyte	MED13L
2.95225e-90	-0.624985	0.123	0.442	9.90124e-86	CD16+ monocyte	PRDX2
5.20583e-88	-0.562247	0.015	0.313	1.74593e-83	CD16+ monocyte	PCLAF
4.98877e-85	-0.611283	0.044	0.341	1.67313e-80	CD16+ monocyte	CD69
6.61135e-84	-0.525237	0.449	0.665	2.21732e-79	CD16+ monocyte	HMGB2
3.65565e-81	-0.504522	0.006	0.284	1.22603e-76	CD16+ monocyte	TYMS
3.5344e-78	-0.524213	0.01	0.281	1.18537e-73	CD16+ monocyte	CTSW
5.83094e-53	-0.528304	0.01	0.208	1.95558e-48	CD16+ monocyte	IGLL1
3.56433e-48	-0.531821	0.043	0.24	1.19541e-43	CD16+ monocyte	IGHM
1.37174e-44	-0.538535	0.027	0.203	4.60056e-40	CD16+ monocyte	IL32
4.85921e-42	-0.576055	0.035	0.206	1.62968e-37	CD16+ monocyte	CCL5
8.67008e-29	-0.504255	0.179	0.325	2.90777e-24	CD16+ monocyte	NKG7
0	1.99543	0.97	0.12	0	CD16+ NK	GNLY
0	1.66642	0.923	0.079	0	CD16+ NK	GZMB
0	1.63553	1	0.309	0	CD16+ NK	NKG7
0	1.55962	0.83	0.049	0	CD16+ NK	FGFBP2
0	1.44642	0.813	0.074	0	CD16+ NK	PRF1
0	1.44533	0.925	0.173	0	CD16+ NK	CST7
0	1.4098	0.879	0.123	0	CD16+ NK	GZMA
0	1.38851	0.84	0.19	0	CD16+ NK	CCL5
0	1.38677	0.763	0.066	0	CD16+ NK	SPON2
0	1.36513	0.856	0.124	0	CD16+ NK	KLRB1
0	1.31393	0.857	0.15	0	CD16+ NK	CD247
0	1.28561	0.797	0.088	0	CD16+ NK	KLRD1
0	1.27386	0.762	0.057	0	CD16+ NK	KLRF1
0	1.26221	0.9	0.264	0	CD16+ NK	CTSW
0	1.20819	0.841	0.208	0	CD16+ NK	CD7
0	1.1749	0.659	0.086	0	CD16+ NK	CCL4
0	1.15789	0.66	0.075	0	CD16+ NK	CLIC3
0	1.14619	0.763	0.162	0	CD16+ NK	HOPX
0	1.11538	0.648	0.057	0	CD16+ NK	FCGR3A
0	1.11288	0.611	0.06	0	CD16+ NK	GZMH
0	1.07001	0.707	0.117	0	CD16+ NK	GZMM
0	0.950603	0.547	0.065	0	CD16+ NK	TRDC
0	0.872309	0.8	0.382	0	CD16+ NK	ITGB2
0	0.787265	0.46	0.059	0	CD16+ NK	IL2RB
0	0.767667	0.475	0.076	0	CD16+ NK	PYHIN1
0	0.761593	0.463	0.073	0	CD16+ NK	SAMD3
0	0.758398	0.444	0.087	0	CD16+ NK	TTC38
0	0.648765	0.358	0.025	0	CD16+ NK	S1PR5
0	0.644277	0.982	0.819	0	CD16+ NK	HLA-C
0	0.636692	0.393	0.073	0	CD16+ NK	ZAP70
0	0.630709	0.342	0.037	0	CD16+ NK	CD160
0	0.630019	0.364	0.052	0	CD16+ NK	NCR3
0	0.6181	0.344	0.061	0	CD16+ NK	ADGRG1
0	0.581855	0.984	0.837	0	CD16+ NK	HLA-A
0	0.569873	0.294	0.024	0	CD16+ NK	PRSS23
0	0.561801	0.298	0.024	0	CD16+ NK	FCRL6
0	0.529301	0.271	0.018	0	CD16+ NK	SH2D1B
0	0.5289	0.992	0.866	0	CD16+ NK	HLA-B
6.49852e-305	0.867404	0.914	0.398	2.17947e-300	CD16+ NK	TYROBP
3.22016e-301	0.801426	0.88	0.498	1.07998e-296	CD16+ NK	HCST
7.49763e-283	0.501668	0.164	0.015	2.51456e-278	CD16+ NK	PTGDS
3.2683e-270	0.604315	0.93	0.726	1.09612e-265	CD16+ NK	HLA-E
1.3517e-269	0.713565	0.471	0.114	4.53333e-265	CD16+ NK	TRBC1
9.19577e-266	0.775274	0.613	0.223	3.08408e-261	CD16+ NK	RARRES3
1.16513e-253	0.617643	0.378	0.084	3.9076e-249	CD16+ NK	TXK
2.84401e-252	0.741729	0.528	0.154	9.53823e-248	CD16+ NK	IFITM1
1.87207e-249	0.909642	0.661	0.288	6.27854e-245	CD16+ NK	CMC1
3.11935e-243	0.754851	0.812	0.501	1.04617e-238	CD16+ NK	IFITM2
5.3939e-240	0.742363	0.511	0.154	1.809e-235	CD16+ NK	SYTL3
5.28993e-238	0.565615	0.316	0.062	1.77414e-233	CD16+ NK	TGFBR3
3.33348e-236	0.750622	0.701	0.338	1.11798e-231	CD16+ NK	LITAF
1.15059e-226	0.716348	0.521	0.182	3.85886e-222	CD16+ NK	MATK
1.10084e-225	0.72029	0.533	0.171	3.69198e-221	CD16+ NK	SKAP1
2.51625e-209	0.763639	0.577	0.222	8.43901e-205	CD16+ NK	PRKCH
2.3152e-201	0.71501	0.614	0.284	7.76471e-197	CD16+ NK	BIN2
1.0278e-197	0.695465	0.693	0.366	3.44703e-193	CD16+ NK	EVL
9.90181e-196	-1.17898	0.068	0.573	3.32087e-191	CD16+ NK	HLA-DRA
9.33463e-195	0.632675	0.442	0.133	3.13065e-190	CD16+ NK	STAT4
1.15174e-193	0.60147	0.328	0.076	3.86272e-189	CD16+ NK	CCL3
1.62623e-190	0.692544	0.631	0.298	5.45407e-186	CD16+ NK	MYO1F
2.66687e-190	0.677944	0.508	0.196	8.94415e-186	CD16+ NK	RHOC
1.05067e-186	0.577475	0.424	0.125	3.52375e-182	CD16+ NK	LCK
3.7874e-184	0.695973	0.736	0.363	1.27022e-179	CD16+ NK	FCER1G
6.14168e-180	-0.855522	0.301	0.724	2.0598e-175	CD16+ NK	VIM
2.47548e-177	0.697048	0.519	0.221	8.30226e-173	CD16+ NK	APMAP
6.66899e-176	0.662076	0.53	0.222	2.23665e-171	CD16+ NK	IL2RG
5.59702e-174	-0.94366	0.018	0.497	1.87713e-169	CD16+ NK	AIF1
1.16683e-168	0.728157	0.505	0.201	3.9133e-164	CD16+ NK	AOAH
8.71068e-163	0.63625	0.474	0.181	2.92139e-158	CD16+ NK	RUNX3
1.48864e-158	-0.909958	0.086	0.54	4.99259e-154	CD16+ NK	STMN1
8.10467e-154	0.589825	0.461	0.169	2.71814e-149	CD16+ NK	SYNE2
9.18671e-151	0.612028	0.511	0.213	3.08104e-146	CD16+ NK	ARL4C
1.06585e-150	0.614775	0.418	0.152	3.57464e-146	CD16+ NK	SYNE1
3.32784e-149	0.676131	0.541	0.266	1.11609e-144	CD16+ NK	EFHD2
7.38445e-149	0.664447	0.576	0.293	2.4766e-144	CD16+ NK	GNG2
2.17985e-140	0.571989	0.411	0.154	7.31078e-136	CD16+ NK	DOK2
3.42302e-139	-0.622297	0.355	0.754	1.14801e-134	CD16+ NK	NAP1L1
6.89864e-138	0.615669	0.409	0.16	2.31367e-133	CD16+ NK	ABHD17A
5.18509e-135	-0.925284	0.086	0.496	1.73897e-130	CD16+ NK	CST3
1.64041e-131	0.66274	0.492	0.194	5.50162e-127	CD16+ NK	IL32
1.75913e-131	0.60459	0.652	0.383	5.89978e-127	CD16+ NK	ID2
7.33398e-131	0.589465	0.663	0.435	2.45967e-126	CD16+ NK	AES
1.09875e-127	-0.64797	0.133	0.558	3.68498e-123	CD16+ NK	TKT
2.08623e-125	-0.606809	0.425	0.766	6.99681e-121	CD16+ NK	HSP90AB1
5.94948e-125	-0.58928	0.017	0.409	1.99534e-120	CD16+ NK	TMEM14C
1.50824e-124	-0.622491	0.274	0.673	5.05834e-120	CD16+ NK	ANP32B
2.21411e-124	-0.630826	0.288	0.669	7.42569e-120	CD16+ NK	LDHB
6.81078e-124	0.601864	0.622	0.391	2.2842e-119	CD16+ NK	PPP2R5C
8.56067e-124	-0.685009	0.079	0.482	2.87108e-119	CD16+ NK	HMGA1
2.80876e-121	-0.673411	0.121	0.526	9.42003e-117	CD16+ NK	HSPD1
1.02695e-120	-0.652921	0.033	0.421	3.44417e-116	CD16+ NK	MEF2C
1.41135e-120	0.517007	0.775	0.619	4.73338e-116	CD16+ NK	TXNIP
9.18461e-120	-0.701421	0.049	0.438	3.08034e-115	CD16+ NK	COTL1
1.23627e-115	0.547924	0.381	0.157	4.14619e-111	CD16+ NK	C1orf21
2.24595e-115	-0.732769	0.109	0.496	7.53248e-111	CD16+ NK	HLA-DRB1
1.32639e-112	-0.506981	0.003	0.358	4.44846e-108	CD16+ NK	SPINT2
4.61501e-112	-0.675959	0.039	0.407	1.54778e-107	CD16+ NK	LST1
1.35948e-111	-0.553237	0.012	0.37	4.55943e-107	CD16+ NK	YBX3
1.60269e-111	-0.657533	0.031	0.397	5.37509e-107	CD16+ NK	SOX4
2.75821e-111	-0.569073	0.154	0.569	9.25049e-107	CD16+ NK	YWHAE
2.4837e-110	0.533393	0.454	0.215	8.32983e-106	CD16+ NK	TBC1D10C
9.1454e-107	-0.575423	0.216	0.615	3.06718e-102	CD16+ NK	TXN
1.7493e-106	-0.57315	0.15	0.549	5.86681e-102	CD16+ NK	PRDX1
5.22055e-105	-0.62353	0.498	0.74	1.75087e-100	CD16+ NK	CD74
6.08351e-105	0.509446	0.421	0.19	2.04029e-100	CD16+ NK	HLA-F
6.1996e-104	-0.54652	0.033	0.384	2.07922e-99	CD16+ NK	GNAQ
6.44623e-104	-0.67421	0.321	0.651	2.16194e-99	CD16+ NK	TUBA1B
7.67832e-103	-0.547992	0.155	0.558	2.57515e-98	CD16+ NK	TALDO1
1.73651e-102	-0.56763	0.202	0.586	5.8239e-98	CD16+ NK	H2AFY
4.36605e-102	0.558301	0.55	0.307	1.46429e-97	CD16+ NK	FYN
7.31326e-101	-0.66888	0.228	0.581	2.45272e-96	CD16+ NK	TUBB
3.56013e-98	0.540883	0.578	0.371	1.194e-93	CD16+ NK	TGFB1
2.32938e-96	-0.51928	0.021	0.349	7.81228e-92	CD16+ NK	FCGRT
1.64709e-95	-0.541909	0.039	0.374	5.52402e-91	CD16+ NK	FABP5
3.68444e-95	0.533881	0.446	0.219	1.23569e-90	CD16+ NK	RNF125
6.34934e-95	-0.577067	0.017	0.336	2.12944e-90	CD16+ NK	TCF4
1.0247e-94	0.539522	0.445	0.215	3.43665e-90	CD16+ NK	CEMIP2
8.71237e-94	-0.579529	0.114	0.468	2.92195e-89	CD16+ NK	HSPB1
1.98883e-93	0.511797	0.585	0.393	6.67015e-89	CD16+ NK	LY6E
2.54616e-88	-0.5654	0.013	0.313	8.53932e-84	CD16+ NK	PCLAF
5.03442e-88	-0.540195	0.167	0.52	1.68844e-83	CD16+ NK	DUT
1.71454e-87	-0.962948	0.063	0.372	5.75022e-83	CD16+ NK	LYZ
2.50996e-85	0.515258	0.413	0.219	8.41791e-81	CD16+ NK	CHST12
1.5823e-84	0.531029	0.338	0.149	5.30671e-80	CD16+ NK	RAP1GAP2
3.08156e-84	-0.50494	0.042	0.349	1.03349e-79	CD16+ NK	SSBP2
4.57915e-84	0.505377	0.398	0.203	1.53576e-79	CD16+ NK	TPST2
4.01976e-81	0.501496	0.377	0.17	1.34815e-76	CD16+ NK	DUSP2
4.75715e-77	-0.525264	0.356	0.667	1.59545e-72	CD16+ NK	HMGB2
8.5696e-77	-0.565602	0.188	0.497	2.87407e-72	CD16+ NK	HLA-DPA1
3.97546e-75	-0.510681	0.359	0.652	1.33329e-70	CD16+ NK	H2AFZ
1.60383e-70	0.501594	0.502	0.322	5.37891e-66	CD16+ NK	MT2A
4.5726e-70	0.541104	0.414	0.232	1.53356e-65	CD16+ NK	PITPNC1
8.96394e-68	-0.557808	0.014	0.259	3.00633e-63	CD16+ NK	AFF3
2.06272e-64	-0.50781	0.225	0.514	6.91796e-60	CD16+ NK	HLA-DPB1
3.16616e-57	-0.566541	0.022	0.24	1.06187e-52	CD16+ NK	IGHM
1.69278e-56	-0.737591	0.066	0.297	5.67725e-52	CD16+ NK	S100A9
4.23358e-53	-0.727671	0.056	0.275	1.41986e-48	CD16+ NK	S100A8
2.79681e-52	-0.521187	0.011	0.208	9.37993e-48	CD16+ NK	IGLL1
3.12979e-52	-0.524945	0.202	0.469	1.04967e-47	CD16+ NK	HIST1H4C
9.28051e-48	-0.525378	0.008	0.189	3.1125e-43	CD16+ NK	MPO
3.85862e-05	-0.966943	0.285	0.358	1	CD16+ NK	HBB
4.72238e-05	-0.771985	0.173	0.234	1	CD16+ NK	IGKC
0	1.92951	0.937	0.121	0	CD56+ NK	GNLY
0	1.42257	0.977	0.31	0	CD56+ NK	NKG7
0	1.32196	0.855	0.124	0	CD56+ NK	KLRB1
0	1.32158	0.902	0.207	0	CD56+ NK	CD7
0	1.26307	0.903	0.264	0	CD56+ NK	CTSW
0	1.2253	0.825	0.285	0	CD56+ NK	CMC1
0	1.20711	0.781	0.088	0	CD56+ NK	KLRD1
0	1.17279	0.717	0.058	0	CD56+ NK	KLRF1
0	1.08831	0.671	0.063	0	CD56+ NK	TRDC
0	1.08289	0.617	0.04	0	CD56+ NK	XCL2
0	1.06869	0.722	0.126	0	CD56+ NK	GZMA
0	1.02856	0.723	0.163	0	CD56+ NK	HOPX
0	1.01212	0.702	0.193	0	CD56+ NK	CCL5
0	1.01164	0.548	0.029	0	CD56+ NK	KLRC1
0	0.986935	0.77	0.176	0	CD56+ NK	CST7
0	0.961777	0.599	0.056	0	CD56+ NK	IL2RB
0	0.958644	0.691	0.153	0	CD56+ NK	CD247
0	0.93308	0.489	0.024	0	CD56+ NK	XCL1
0	0.890211	0.89	0.499	0	CD56+ NK	IFITM2
0	0.869415	0.923	0.398	0	CD56+ NK	TYROBP
0	0.849278	0.498	0.07	0	CD56+ NK	GZMK
0	0.842171	0.619	0.18	0	CD56+ NK	MATK
0	0.828286	0.533	0.087	0	CD56+ NK	GZMB
0	0.826579	0.536	0.08	0	CD56+ NK	PRF1
0	0.814566	0.578	0.12	0	CD56+ NK	GZMM
0	0.800266	0.499	0.078	0	CD56+ NK	CLIC3
0	0.795465	0.897	0.498	0	CD56+ NK	HCST
0	0.77735	0.591	0.152	0	CD56+ NK	IFITM1
0	0.714366	0.46	0.073	0	CD56+ NK	SAMD3
0	0.510884	0.283	0.038	0	CD56+ NK	CD160
2.02197e-300	0.639474	0.407	0.083	6.78127e-296	CD56+ NK	TXK
9.86696e-272	0.503984	0.967	0.838	3.30918e-267	CD56+ NK	HLA-A
5.89886e-261	0.593604	0.331	0.063	1.97836e-256	CD56+ NK	NCALD
3.29859e-250	0.503065	0.976	0.819	1.10628e-245	CD56+ NK	HLA-C
2.41403e-234	0.754844	0.532	0.167	8.09617e-230	CD56+ NK	DUSP2
1.23944e-216	0.681045	0.528	0.18	4.15682e-212	CD56+ NK	RUNX3
2.09898e-204	0.660653	0.491	0.155	7.03956e-200	CD56+ NK	SYTL3
8.20964e-185	0.64928	0.808	0.524	2.75335e-180	CD56+ NK	IER2
7.87902e-169	0.508548	0.421	0.125	2.64247e-164	CD56+ NK	LCK
2.23985e-168	-0.948998	0.075	0.54	7.512e-164	CD56+ NK	STMN1
2.41494e-163	-0.904113	0.035	0.497	8.09922e-159	CD56+ NK	AIF1
2.99162e-160	0.51471	0.907	0.706	1.00333e-155	CD56+ NK	BTG1
7.31148e-160	0.660178	0.604	0.295	2.45212e-155	CD56+ NK	MAP3K8
1.88658e-159	0.552363	0.409	0.13	6.3272e-155	CD56+ NK	CD2
5.78162e-159	0.640698	0.694	0.382	1.93904e-154	CD56+ NK	ID2
2.42888e-149	0.608781	0.732	0.363	8.14596e-145	CD56+ NK	FCER1G
2.81273e-148	-0.972232	0.168	0.571	9.43335e-144	CD56+ NK	HLA-DRA
9.43913e-147	0.620519	0.766	0.532	3.1657e-142	CD56+ NK	NFKBIA
3.17708e-146	0.593948	0.638	0.339	1.06553e-141	CD56+ NK	LITAF
2.32795e-144	0.53829	0.404	0.134	7.80746e-140	CD56+ NK	STAT4
1.86871e-143	0.588697	0.575	0.284	6.26726e-139	CD56+ NK	BIN2
1.75936e-138	0.559813	0.512	0.213	5.90055e-134	CD56+ NK	ARL4C
4.52567e-138	0.564593	0.475	0.179	1.51782e-133	CD56+ NK	AREG
2.2687e-135	0.573528	0.65	0.392	7.60876e-131	CD56+ NK	LY6E
2.10878e-134	-0.661908	0.121	0.55	7.07241e-130	CD56+ NK	PRDX1
6.28371e-132	0.500778	0.415	0.154	2.10743e-127	CD56+ NK	DOK2
2.52907e-129	0.559488	0.663	0.385	8.482e-125	CD56+ NK	ITGB2
2.84209e-129	-0.908595	0.101	0.496	9.53181e-125	CD56+ NK	CST3
8.83648e-129	0.542674	0.703	0.5	2.96358e-124	CD56+ NK	JAK1
2.55334e-127	0.533748	0.454	0.173	8.5634e-123	CD56+ NK	SKAP1
7.64257e-126	0.551156	0.642	0.367	2.56317e-121	CD56+ NK	EVL
2.115e-122	0.5698	0.506	0.223	7.09329e-118	CD56+ NK	PRKCH
8.66941e-120	0.524401	0.497	0.225	2.90755e-115	CD56+ NK	RARRES3
1.88359e-117	0.564546	0.48	0.218	6.31719e-113	CD56+ NK	RNF125
4.93027e-117	-0.718448	0.322	0.651	1.65351e-112	CD56+ NK	TUBA1B
1.23094e-116	-0.61284	0.163	0.558	4.12832e-112	CD56+ NK	TKT
1.1517e-115	0.580327	0.576	0.331	3.86256e-111	CD56+ NK	SELL
2.99169e-114	-0.634278	0.046	0.42	1.00335e-109	CD56+ NK	MEF2C
1.35337e-112	0.550572	0.528	0.274	4.53894e-108	CD56+ NK	STK17A
1.42686e-111	0.538848	0.71	0.468	4.7854e-107	CD56+ NK	ZFP36
2.55826e-111	-0.643442	0.11	0.481	8.57989e-107	CD56+ NK	HMGA1
3.22837e-111	0.510328	0.477	0.223	1.08273e-106	CD56+ NK	IL2RG
2.95087e-107	-0.582452	0.472	0.72	9.89663e-103	CD56+ NK	VIM
2.99309e-106	0.537792	0.552	0.306	1.00382e-101	CD56+ NK	IRF1
5.17136e-105	-0.616978	0.32	0.652	1.73437e-100	CD56+ NK	H2AFZ
5.75276e-105	0.540595	0.616	0.33	1.92936e-100	CD56+ NK	CD69
3.47802e-98	-0.659377	0.254	0.581	1.16646e-93	CD56+ NK	TUBB
1.72282e-96	0.561906	0.435	0.202	5.778e-92	CD56+ NK	AOAH
8.23324e-95	-0.515605	0.193	0.558	2.76126e-90	CD56+ NK	TALDO1
9.3578e-95	-0.502026	0.038	0.37	3.13842e-90	CD56+ NK	YBX3
6.38488e-94	-0.515446	0.027	0.349	2.14136e-89	CD56+ NK	FCGRT
3.77569e-92	-0.506397	0.029	0.349	1.26629e-87	CD56+ NK	GRN
6.7713e-92	-0.523956	0.248	0.585	2.27096e-87	CD56+ NK	H2AFY
5.08632e-90	-0.568736	0.127	0.468	1.70585e-85	CD56+ NK	HSPB1
1.27443e-89	-0.559416	0.186	0.525	4.27418e-85	CD56+ NK	HSPD1
5.23009e-88	-0.500834	0.28	0.614	1.75407e-83	CD56+ NK	TXN
1.05213e-86	-0.559463	0.016	0.313	3.52863e-82	CD56+ NK	PCLAF
2.15128e-86	0.510853	0.45	0.195	7.21497e-82	CD56+ NK	IL32
1.84219e-83	0.500082	0.531	0.308	6.17833e-79	CD56+ NK	FYN
5.13554e-82	-0.949243	0.076	0.372	1.72236e-77	CD56+ NK	LYZ
1.94817e-81	-0.534984	0.38	0.667	6.53377e-77	CD56+ NK	HMGB2
2.56544e-80	-0.500005	0.007	0.284	8.60397e-76	CD56+ NK	TYMS
1.49472e-76	-0.511706	0.05	0.335	5.01301e-72	CD56+ NK	TCF4
6.44033e-75	-0.533201	0.108	0.406	2.15996e-70	CD56+ NK	LST1
1.7462e-73	-0.569411	0.203	0.494	5.85642e-69	CD56+ NK	HLA-DRB1
2.32297e-71	-0.572921	0.064	0.342	7.79077e-67	CD56+ NK	BLVRB
1.28042e-64	-0.623298	0.23	0.476	4.29429e-60	CD56+ NK	LGALS1
6.93598e-63	-0.510647	0.233	0.496	2.32619e-58	CD56+ NK	HLA-DPA1
1.06224e-62	-0.508217	0.248	0.514	3.56255e-58	CD56+ NK	HLA-DPB1
3.22966e-59	-0.575126	0.018	0.24	1.08316e-54	CD56+ NK	IGHM
2.53275e-58	-0.516629	0.038	0.268	8.49434e-54	CD56+ NK	HSPA1A
8.60919e-52	-0.730342	0.079	0.297	2.88735e-47	CD56+ NK	S100A9
1.24756e-51	-0.726351	0.06	0.275	4.18406e-47	CD56+ NK	S100A8
4.4197e-49	-0.509913	0.018	0.208	1.48228e-44	CD56+ NK	IGLL1
1.90405e-43	-0.506723	0.017	0.189	6.38579e-39	CD56+ NK	MPO
5.40675e-12	-0.866551	0.14	0.234	1.81332e-07	CD56+ NK	IGKC
5.41066e-07	-1.02662	0.282	0.358	0.0181463	CD56+ NK	HBB
0	1.54127	0.97	0.204	0	cDC1	HLA-DQA1
0	1.52183	1	0.482	0	cDC1	CST3
0	1.48723	0.995	0.486	0	cDC1	HLA-DPA1
0	1.47734	0.98	0.284	0	cDC1	HLA-DQB1
0	1.45951	0.995	0.483	0	cDC1	HLA-DRB1
0	1.44948	0.998	0.503	0	cDC1	HLA-DPB1
0	1.35922	0.847	0.171	0	cDC1	CPVL
0	1.33857	0.728	0.095	0	cDC1	CCSER1
0	1.33655	0.866	0.122	0	cDC1	WDFY4
0	1.329	1	0.558	0	cDC1	HLA-DRA
0	1.30794	0.854	0.065	0	cDC1	C1orf54
0	1.2627	0.953	0.188	0	cDC1	IRF8
0	1.24135	0.854	0.204	0	cDC1	HDAC9
0	1.17819	1	0.732	0	cDC1	CD74
0	1.16259	0.789	0.012	0	cDC1	CLEC9A
0	1.12835	0.978	0.44	0	cDC1	S100A10
0	1.06954	0.713	0.02	0	cDC1	CLNK
0	1.01887	0.891	0.241	0	cDC1	CPNE3
0	0.993274	0.819	0.076	0	cDC1	SHTN1
0	0.990864	0.626	0.043	0	cDC1	LGALS2
0	0.96854	0.909	0.256	0	cDC1	C1orf162
0	0.965104	0.95	0.365	0	cDC1	HLA-DMA
0	0.950556	0.762	0.161	0	cDC1	CAMK2D
0	0.905355	0.631	0.036	0	cDC1	CADM1
0	0.897903	0.826	0.186	0	cDC1	BASP1
0	0.88246	0.73	0.017	0	cDC1	BATF3
0	0.882148	0.753	0.113	0	cDC1	FGL2
0	0.875872	0.76	0.163	0	cDC1	CD83
0	0.822187	0.718	0.111	0	cDC1	FLT3
0	0.813744	0.842	0.193	0	cDC1	HLA-DMB
0	0.807017	0.564	0.069	0	cDC1	NEGR1
0	0.762469	0.693	0.087	0	cDC1	CLEC7A
0	0.748402	0.51	0.032	0	cDC1	DNASE1L3
0	0.740724	0.532	0.001	0	cDC1	IDO1
0	0.720309	0.792	0.159	0	cDC1	LY86
0	0.690987	0.663	0.135	0	cDC1	FNIP2
0	0.682078	0.671	0.114	0	cDC1	CSF2RA
0	0.661732	0.68	0.115	0	cDC1	DAPP1
0	0.627527	0.686	0.126	0	cDC1	ADAM28
0	0.602722	0.513	0.063	0	cDC1	NCALD
0	0.594814	0.621	0.106	0	cDC1	VAC14
0	0.587771	0.587	0.05	0	cDC1	NDRG2
0	0.573541	0.604	0.095	0	cDC1	KCNK6
0	0.569903	0.349	0.037	0	cDC1	S100B
0	0.559801	0.611	0.085	0	cDC1	HAVCR2
0	0.545791	0.549	0.055	0	cDC1	SLAMF7
0	0.530899	0.633	0.109	0	cDC1	TGFBI
0	0.523897	0.5	0.038	0	cDC1	TSPAN33
0	0.513746	0.48	0.07	0	cDC1	P2RY14
9.93601e-308	0.538578	0.461	0.067	3.33234e-303	cDC1	CCDC26
2.82083e-305	0.928973	0.971	0.618	9.46051e-301	cDC1	SNX3
3.14552e-298	1.21856	0.831	0.285	1.05494e-293	cDC1	HLA-DRB5
3.49337e-297	0.805775	0.71	0.16	1.17161e-292	cDC1	FAM129A
5.13751e-293	0.532404	0.634	0.122	1.72302e-288	cDC1	LGMN
6.05226e-293	0.638278	0.695	0.154	2.02981e-288	cDC1	NAAA
5.36821e-289	0.899246	0.95	0.392	1.80039e-284	cDC1	RGS10
4.90058e-284	0.593183	0.591	0.115	1.64356e-279	cDC1	DST
2.97927e-275	0.557328	0.587	0.108	9.99187e-271	cDC1	2023-03-01
9.85327e-269	0.576372	0.601	0.118	3.30459e-264	cDC1	MPEG1
3.19833e-268	0.515555	0.616	0.124	1.07266e-263	cDC1	CIITA
1.7298e-265	0.774295	0.844	0.29	5.8014e-261	cDC1	PPT1
2.62187e-262	0.971202	0.95	0.424	8.79322e-258	cDC1	COTL1
1.73143e-258	0.83874	0.654	0.152	5.80689e-254	cDC1	GAS7
1.9253e-252	0.847184	0.903	0.287	6.45708e-248	cDC1	SAMHD1
6.32933e-249	0.76887	0.883	0.284	2.12273e-244	cDC1	SPI1
8.40771e-249	0.566082	0.641	0.147	2.81978e-244	cDC1	TAP1
1.49313e-245	1.24976	0.983	0.359	5.00767e-241	cDC1	LYZ
3.01329e-241	0.801806	0.857	0.315	1.0106e-236	cDC1	BID
8.70044e-234	0.747015	0.721	0.208	2.91795e-229	cDC1	DENND1B
2.70672e-233	0.53389	0.997	0.944	9.07781e-229	cDC1	TMSB10
6.88666e-229	0.786626	0.832	0.265	2.30965e-224	cDC1	RAB11FIP1
1.72909e-227	0.715945	0.856	0.27	5.79902e-223	cDC1	PTPRE
2.52083e-222	0.696968	0.772	0.231	8.45436e-218	cDC1	CTSZ
2.04574e-220	0.539096	0.676	0.175	6.861e-216	cDC1	DPYSL2
5.21715e-218	0.730031	0.919	0.408	1.74973e-213	cDC1	PPA1
1.15935e-212	0.630778	0.446	0.088	3.88822e-208	cDC1	HLA-DQA2
2.88123e-212	0.615726	0.628	0.149	9.66305e-208	cDC1	SLC8A1
4.17161e-212	0.605397	0.582	0.143	1.39908e-207	cDC1	PLEKHA5
4.23552e-211	0.595988	0.728	0.195	1.42051e-206	cDC1	RAB31
9.82931e-207	0.779204	0.988	0.712	3.29655e-202	cDC1	VIM
2.95328e-206	0.599466	0.721	0.208	9.90471e-202	cDC1	VOPP1
2.13056e-201	0.672472	0.97	0.698	7.14549e-197	cDC1	GSTP1
7.85297e-200	0.742431	0.956	0.48	2.63373e-195	cDC1	LSP1
1.62579e-198	0.80707	0.898	0.382	5.45258e-194	cDC1	ID2
2.48083e-194	0.550505	0.614	0.163	8.32021e-190	cDC1	ST8SIA4
3.87104e-193	0.697524	0.889	0.354	1.29827e-188	cDC1	AP1S2
5.85453e-192	0.666027	0.878	0.311	1.96349e-187	cDC1	PLEK
3.27452e-191	0.740408	0.819	0.302	1.09821e-186	cDC1	ASAP1
2.11142e-190	0.553454	0.691	0.201	7.08127e-186	cDC1	RAB32
2.34391e-190	0.703451	0.883	0.374	7.86099e-186	cDC1	PSMB9
2.42691e-190	0.621334	0.799	0.286	8.13938e-186	cDC1	C20orf27
3.13257e-189	0.76747	0.928	0.45	1.0506e-184	cDC1	FNBP1
4.117e-189	0.676489	0.862	0.337	1.38076e-184	cDC1	FCGRT
3.50825e-187	0.691404	0.869	0.358	1.1766e-182	cDC1	CCDC88A
1.1371e-186	0.542615	0.718	0.223	3.81361e-182	cDC1	PAK1
5.53503e-186	0.672197	0.872	0.336	1.85634e-181	cDC1	GRN
6.40772e-179	0.519311	0.978	0.77	2.14902e-174	cDC1	ARPC2
5.1262e-172	0.718358	0.592	0.167	1.71923e-167	cDC1	PIK3R5
9.12408e-170	0.587257	1	0.953	3.06003e-165	cDC1	TMSB4X
6.18704e-169	0.506762	0.619	0.177	2.07501e-164	cDC1	SH2B3
7.19657e-169	0.701977	0.946	0.537	2.41358e-164	cDC1	FAM49B
8.98255e-169	0.500168	0.572	0.154	3.01257e-164	cDC1	SUSD6
1.08484e-164	0.794944	0.795	0.338	3.63835e-160	cDC1	ETV6
4.58275e-164	0.66039	0.596	0.161	1.53696e-159	cDC1	AC020656.1
4.95447e-156	0.552797	0.812	0.332	1.66163e-151	cDC1	ATG3
9.02749e-155	0.596217	0.826	0.356	3.02764e-150	cDC1	RNH1
1.03143e-152	0.653174	0.97	0.533	3.45923e-148	cDC1	LCP1
2.14688e-148	0.575691	0.802	0.286	7.20022e-144	cDC1	AHNAK
5.52536e-144	0.553454	0.644	0.208	1.8531e-139	cDC1	LMNA
9.84723e-144	0.583233	0.846	0.373	3.30256e-139	cDC1	UPF2
1.22282e-142	0.655832	0.854	0.348	4.10108e-138	cDC1	ANXA2
3.72032e-142	0.543673	0.789	0.308	1.24772e-137	cDC1	CNN2
3.00392e-140	0.77101	0.977	0.466	1.00745e-135	cDC1	LGALS1
3.33944e-138	0.50624	0.599	0.202	1.11998e-133	cDC1	OXSR1
1.25171e-136	0.610934	0.854	0.398	4.19798e-132	cDC1	RNASET2
1.8216e-134	0.591699	0.866	0.419	6.10929e-130	cDC1	ARF6
7.81702e-123	0.62242	0.951	0.572	2.62167e-118	cDC1	SAT1
4.1477e-122	0.530226	0.886	0.446	1.39106e-117	cDC1	CSTB
2.32386e-120	0.546508	0.938	0.581	7.79376e-116	cDC1	TAGLN2
5.51298e-120	0.585592	0.738	0.31	1.84894e-115	cDC1	UVRAG
1.63839e-112	0.538998	0.889	0.502	5.49483e-108	cDC1	ARPC1B
1.28061e-111	0.599153	0.941	0.483	4.2949e-107	cDC1	AIF1
4.13209e-108	0.652059	0.676	0.268	1.38582e-103	cDC1	AUTS2
9.86872e-108	0.519192	0.822	0.382	3.30977e-103	cDC1	PYCARD
6.91108e-107	0.581747	0.77	0.356	2.31784e-102	cDC1	ATP2B1
1.7254e-105	0.509207	0.898	0.526	5.78664e-101	cDC1	ACTR3
4.19114e-105	0.549493	0.715	0.303	1.40562e-100	cDC1	LPP
1.9334e-103	0.516348	0.844	0.436	6.48423e-99	cDC1	UCP2
1.33175e-100	-0.860672	0.087	0.541	4.46641e-96	cDC1	ZEB2
4.27118e-75	-0.654671	0.396	0.663	1.43247e-70	cDC1	ZFP36L2
7.38011e-74	-0.66242	0.111	0.47	2.47514e-69	cDC1	NUCB2
1.01539e-53	-0.65189	0.263	0.508	3.40542e-49	cDC1	HCST
7.24867e-47	-0.611819	0.22	0.458	2.43106e-42	cDC1	PLAC8
1.79786e-37	-0.562924	0.109	0.338	6.02966e-33	cDC1	CD69
1.35746e-34	-0.674568	0.106	0.325	4.55265e-30	cDC1	NKG7
3.86188e-27	-0.547774	0.027	0.201	1.2952e-22	cDC1	IL32
1.93637e-25	-0.547556	0.065	0.238	6.4942e-21	cDC1	IGHM
2.02534e-21	-0.552508	0.054	0.204	6.79258e-17	cDC1	CCL5
1.45849e-15	-0.543295	0.347	0.408	4.89148e-11	cDC1	TYROBP
2.25573e-13	-0.620234	0.161	0.272	7.56525e-09	cDC1	S100A8
0	1.3075	0.984	0.354	0	cDC2	LYZ
0	1.17402	0.988	0.479	0	cDC2	CST3
0	1.13181	0.816	0.201	0	cDC2	HLA-DQA1
0	1.07601	0.975	0.479	0	cDC2	HLA-DRB1
0	1.07109	0.872	0.281	0	cDC2	HLA-DQB1
0	1.06676	0.975	0.482	0	cDC2	HLA-DPA1
0	1.04732	0.834	0.281	0	cDC2	HLA-DRB5
0	1.03968	0.954	0.5	0	cDC2	HLA-DPB1
0	1.03612	0.667	0.027	0	cDC2	CLEC10A
0	1.01626	0.991	0.555	0	cDC2	HLA-DRA
0	0.994803	0.641	0.089	0	cDC2	FCER1A
0	0.940125	0.951	0.42	0	cDC2	COTL1
0	0.939597	0.695	0.14	0	cDC2	FCN1
0	0.926806	0.961	0.436	0	cDC2	S100A10
0	0.913792	0.793	0.171	0	cDC2	MNDA
0	0.884273	0.783	0.13	0	cDC2	CFP
0	0.883154	0.895	0.282	0	cDC2	SAMHD1
0	0.881969	0.974	0.462	0	cDC2	LGALS1
0	0.878035	0.969	0.397	0	cDC2	TYROBP
0	0.863856	0.636	0.139	0	cDC2	VCAN
0	0.862585	0.802	0.173	0	cDC2	CSTA
0	0.834509	0.913	0.343	0	cDC2	ANXA2
0	0.827204	0.848	0.252	0	cDC2	C1orf162
0	0.808729	0.873	0.35	0	cDC2	AP1S2
0	0.807306	0.999	0.73	0	cDC2	CD74
0	0.807244	0.732	0.168	0	cDC2	CPVL
0	0.80262	0.893	0.361	0	cDC2	HLA-DMA
0	0.797148	0.922	0.374	0	cDC2	S100A11
0	0.788084	0.745	0.151	0	cDC2	JAML
0	0.783729	0.923	0.39	0	cDC2	LST1
0	0.78337	0.933	0.36	0	cDC2	FCER1G
0	0.782956	0.529	0.041	0	cDC2	LGALS2
0	0.777789	0.728	0.161	0	cDC2	CEBPD
0	0.765225	0.739	0.147	0	cDC2	CTSH
0	0.734503	0.634	0.098	0	cDC2	CD86
0	0.734448	0.832	0.28	0	cDC2	SPI1
0	0.724849	0.64	0.094	0	cDC2	IGSF6
0	0.723825	0.744	0.19	0	cDC2	HLA-DMB
0	0.705164	0.638	0.16	0	cDC2	GPR183
0	0.702559	0.657	0.11	0	cDC2	FGL2
0	0.700151	0.718	0.156	0	cDC2	LY86
0	0.671379	0.763	0.235	0	cDC2	TYMP
0	0.65981	0.598	0.111	0	cDC2	CSF2RA
0	0.654985	0.44	0.017	0	cDC2	CD1C
0	0.643438	0.621	0.15	0	cDC2	PLAUR
0	0.63821	0.58	0.094	0	cDC2	PLBD1
0	0.636871	0.569	0.078	0	cDC2	IFI30
0	0.635366	0.519	0.052	0	cDC2	GPAT3
0	0.635183	0.638	0.135	0	cDC2	KLF4
0	0.604775	0.674	0.177	0	cDC2	RNASE6
0	0.578277	0.551	0.092	0	cDC2	NCF2
0	0.571911	0.626	0.159	0	cDC2	ALDH2
0	0.565894	0.526	0.086	0	cDC2	CLEC7A
0	0.552184	0.553	0.079	0	cDC2	CLEC4A
0	0.550915	0.583	0.145	0	cDC2	CASP1
0	0.545216	0.555	0.122	0	cDC2	KCTD12
0	0.541129	0.543	0.108	0	cDC2	SULF2
0	0.54081	0.621	0.137	0	cDC2	FGR
0	0.526279	0.341	0.033	0	cDC2	PID1
0	0.52397	0.369	0.025	0	cDC2	ENHO
0	0.521582	0.386	0.041	0	cDC2	RTN1
0	0.509516	0.486	0.069	0	cDC2	IL13RA1
1.89256e-306	0.61721	0.667	0.192	6.34726e-302	cDC2	RAB31
1.82613e-305	0.73276	0.901	0.401	6.12447e-301	cDC2	CTSS
3.07937e-301	0.704324	0.609	0.157	1.03276e-296	cDC2	AC020656.1
5.14933e-300	0.691752	0.845	0.333	1.72698e-295	cDC2	GRN
5.47641e-297	0.640084	0.991	0.71	1.83668e-292	cDC2	VIM
2.92795e-295	0.618689	0.767	0.263	9.81977e-291	cDC2	GLIPR1
2.04255e-291	0.967568	0.797	0.283	6.8503e-287	cDC2	S100A9
3.75673e-278	0.628784	0.984	0.725	1.25993e-273	cDC2	S100A4
8.43012e-277	0.67186	0.747	0.273	2.82729e-272	cDC2	CAPG
9.94251e-277	0.603996	0.57	0.153	3.33452e-272	cDC2	RBM47
1.48069e-274	0.52902	0.631	0.185	4.96594e-270	cDC2	TNFSF13B
6.44871e-273	0.652977	0.819	0.33	2.16277e-268	cDC2	ANXA5
4.25928e-271	0.507862	0.405	0.086	1.42848e-266	cDC2	HLA-DQA2
5.70629e-262	0.578153	0.687	0.228	1.91378e-257	cDC2	CTSZ
1.62316e-254	0.62573	0.962	0.705	5.44375e-250	cDC2	S100A6
4.94705e-252	0.625344	0.872	0.406	1.65914e-247	cDC2	RNF130
1.99379e-249	0.514394	0.579	0.164	6.68676e-245	cDC2	LGALS3
1.84142e-248	0.582676	0.535	0.147	6.17575e-244	cDC2	SLC8A1
2.82486e-246	0.656929	0.916	0.477	9.47403e-242	cDC2	LSP1
1.9142e-245	0.667005	0.944	0.479	6.41986e-241	cDC2	AIF1
1.78031e-241	0.689075	0.922	0.478	5.9708e-237	cDC2	ANXA1
8.01985e-239	0.734779	0.666	0.239	2.6897e-234	cDC2	PLXDC2
2.31838e-238	0.539436	0.631	0.221	7.77538e-234	cDC2	PAK1
1.57331e-233	0.586957	0.815	0.338	5.27656e-229	cDC2	TIMP1
2.19057e-229	0.587345	0.796	0.334	7.34674e-225	cDC2	FCGRT
4.51213e-227	0.555977	0.62	0.213	1.51328e-222	cDC2	PHACTR1
1.14827e-222	0.581451	0.48	0.129	3.85106e-218	cDC2	MS4A6A
1.23243e-204	0.559408	0.732	0.283	4.13332e-200	cDC2	AHNAK
3.62685e-202	0.57323	0.853	0.381	1.21637e-197	cDC2	ITGB2
1.52886e-180	0.545094	0.868	0.499	5.12749e-176	cDC2	ARPC1B
5.97139e-180	0.541649	0.568	0.205	2.00268e-175	cDC2	HDAC9
3.64448e-175	0.527783	0.786	0.38	1.22229e-170	cDC2	PYCARD
3.13312e-173	0.675793	0.669	0.263	1.05079e-168	cDC2	S100A8
1.70356e-172	0.531674	0.879	0.558	5.71342e-168	cDC2	TSPO
3.41401e-167	0.544518	0.91	0.57	1.14499e-162	cDC2	SAT1
2.00035e-159	0.512939	0.552	0.2	6.70879e-155	cDC2	AOAH
1.05727e-156	0.524631	0.871	0.523	3.54587e-152	cDC2	PSAP
1.06777e-135	0.547046	0.909	0.571	3.58108e-131	cDC2	FOS
8.10115e-134	0.505179	0.627	0.288	2.71696e-129	cDC2	NAMPT
1.48638e-131	0.546616	0.698	0.354	4.98503e-127	cDC2	ATP2B1
3.38035e-114	0.506874	0.57	0.256	1.1337e-109	cDC2	ARHGAP26
1.6558e-70	-0.588315	0.303	0.536	5.55323e-66	cDC2	STMN1
3.81539e-50	-0.500205	0.136	0.339	1.2796e-45	cDC2	CD69
6.71404e-49	-0.563381	0.017	0.203	2.25176e-44	cDC2	IL32
1.13488e-44	-0.532928	0.054	0.239	3.80618e-40	cDC2	IGHM
0	1.30659	0.988	0.354	0	cDC2 (cycling)	LYZ
0	1.1184	0.994	0.478	0	cDC2 (cycling)	CST3
0	1.07727	0.975	0.28	0	cDC2 (cycling)	SAMHD1
0	1.02889	0.778	0.086	0	cDC2 (cycling)	FCER1A
0	0.962734	0.987	0.482	0	cDC2 (cycling)	HLA-DPA1
0	0.945663	0.969	0.342	0	cDC2 (cycling)	ANXA2
0	0.937164	0.855	0.28	0	cDC2 (cycling)	HLA-DRB5
0	0.914826	0.982	0.462	0	cDC2 (cycling)	LGALS1
0	0.903222	0.975	0.42	0	cDC2 (cycling)	COTL1
0	0.897185	0.972	0.48	0	cDC2 (cycling)	HLA-DRB1
0	0.896593	0.958	0.436	0	cDC2 (cycling)	S100A10
0	0.880537	0.996	0.555	0	cDC2 (cycling)	HLA-DRA
0	0.878645	0.706	0.155	0	cDC2 (cycling)	AC020656.1
0	0.857078	0.981	0.499	0	cDC2 (cycling)	HLA-DPB1
0	0.794301	0.882	0.28	0	cDC2 (cycling)	HLA-DQB1
0	0.792935	0.823	0.2	0	cDC2 (cycling)	HLA-DQA1
0	0.785551	0.809	0.17	0	cDC2 (cycling)	MNDA
0	0.782858	0.734	0.13	0	cDC2 (cycling)	RNASE2
0	0.757877	0.882	0.27	0	cDC2 (cycling)	CAPG
0	0.75543	0.561	0.029	0	cDC2 (cycling)	CLEC10A
0	0.746965	1	0.73	0	cDC2 (cycling)	CD74
0	0.737461	0.81	0.173	0	cDC2 (cycling)	CSTA
0	0.71472	0.795	0.159	0	cDC2 (cycling)	PLD4
0	0.696853	0.998	0.71	0	cDC2 (cycling)	VIM
0	0.695272	0.734	0.092	0	cDC2 (cycling)	IGSF6
0	0.693825	0.94	0.361	0	cDC2 (cycling)	HLA-DMA
0	0.687782	0.759	0.156	0	cDC2 (cycling)	ALDH2
0	0.687731	0.876	0.279	0	cDC2 (cycling)	SPI1
0	0.677163	0.755	0.131	0	cDC2 (cycling)	CFP
0	0.674854	0.891	0.329	0	cDC2 (cycling)	ANXA5
0	0.65302	0.823	0.225	0	cDC2 (cycling)	CTSZ
0	0.647123	0.761	0.151	0	cDC2 (cycling)	JAML
0	0.640519	0.751	0.157	0	cDC2 (cycling)	GPR183
0	0.637149	0.804	0.189	0	cDC2 (cycling)	HLA-DMB
0	0.630862	0.581	0.02	0	cDC2 (cycling)	ENHO
0	0.627867	0.992	0.695	0	cDC2 (cycling)	GSTP1
0	0.620593	0.737	0.147	0	cDC2 (cycling)	CTSH
0	0.616513	0.766	0.218	0	cDC2 (cycling)	PAK1
0	0.600906	0.823	0.252	0	cDC2 (cycling)	C1orf162
0	0.598964	0.756	0.155	0	cDC2 (cycling)	LY86
0	0.595977	0.834	0.256	0	cDC2 (cycling)	IGFBP7
0	0.57451	0.776	0.246	0	cDC2 (cycling)	SNRNP25
0	0.545285	0.676	0.12	0	cDC2 (cycling)	KCTD12
0	0.543099	0.665	0.11	0	cDC2 (cycling)	FGL2
0	0.528449	0.716	0.176	0	cDC2 (cycling)	RNASE6
0	0.50577	0.664	0.135	0	cDC2 (cycling)	KLF4
2.90897e-299	0.503907	0.721	0.211	9.75611e-295	cDC2 (cycling)	PHACTR1
4.78534e-298	0.586598	0.861	0.285	1.60491e-293	cDC2 (cycling)	C12orf75
1.14297e-295	0.608504	0.869	0.351	3.83328e-291	cDC2 (cycling)	RNH1
2.58995e-292	0.661941	0.983	0.639	8.68618e-288	cDC2 (cycling)	H2AFZ
5.21751e-290	0.643648	0.911	0.377	1.74985e-285	cDC2 (cycling)	PYCARD
1.32559e-278	0.549455	0.795	0.283	4.44578e-274	cDC2 (cycling)	C20orf27
1.3952e-274	0.598222	0.88	0.332	4.67924e-270	cDC2 (cycling)	GRN
1.18752e-261	0.612998	0.862	0.351	3.98272e-257	cDC2 (cycling)	AP1S2
5.78174e-260	0.521904	0.786	0.262	1.93908e-255	cDC2 (cycling)	GLIPR1
1.00806e-250	0.672397	0.945	0.359	3.38083e-246	cDC2 (cycling)	FCER1G
4.05128e-247	0.578552	0.882	0.358	1.35872e-242	cDC2 (cycling)	FABP5
2.73323e-245	0.607472	0.976	0.584	9.16669e-241	cDC2 (cycling)	CORO1A
2.45685e-244	0.520847	0.843	0.34	8.23977e-240	cDC2 (cycling)	NUDT1
3.0114e-241	0.634882	0.951	0.477	1.00996e-236	cDC2 (cycling)	LSP1
1.08285e-237	0.536172	0.855	0.333	3.63165e-233	cDC2 (cycling)	FCGRT
2.88158e-235	0.660653	0.963	0.478	9.66423e-231	cDC2 (cycling)	ANXA1
2.3508e-234	0.534572	0.605	0.184	7.8841e-230	cDC2 (cycling)	MKI67
4.76109e-234	0.652633	0.92	0.374	1.59677e-229	cDC2 (cycling)	S100A11
2.00143e-233	0.556485	0.94	0.524	6.7124e-229	cDC2 (cycling)	AP2S1
2.74025e-228	0.531697	0.846	0.355	9.19026e-224	cDC2 (cycling)	CCDC88A
1.90766e-227	0.577503	0.993	0.725	6.39792e-223	cDC2 (cycling)	S100A4
1.69538e-223	0.500438	0.871	0.337	5.68597e-219	cDC2 (cycling)	TIMP1
1.02805e-220	0.570662	0.914	0.39	3.44787e-216	cDC2 (cycling)	LST1
5.19233e-219	0.571068	0.941	0.498	1.7414e-214	cDC2 (cycling)	ARPC1B
7.68093e-214	0.59895	0.99	0.638	2.57603e-209	cDC2 (cycling)	TUBA1B
9.90795e-214	0.547574	0.959	0.527	3.32293e-209	cDC2 (cycling)	DBI
1.90038e-212	0.54123	0.861	0.387	6.37349e-208	cDC2 (cycling)	PLP2
1.98515e-212	0.612513	0.967	0.479	6.65781e-208	cDC2 (cycling)	AIF1
7.63295e-212	0.538907	0.91	0.405	2.55994e-207	cDC2 (cycling)	RNF130
2.05295e-208	0.541668	0.932	0.535	6.88518e-204	cDC2 (cycling)	DEK
5.26219e-204	0.614098	0.562	0.177	1.76483e-199	cDC2 (cycling)	AREG
8.28117e-201	0.535923	0.965	0.571	2.77734e-196	cDC2 (cycling)	H2AFY
1.2441e-197	0.517039	0.958	0.595	4.17246e-193	cDC2 (cycling)	VAMP8
1.37211e-188	0.531135	0.756	0.299	4.60179e-184	cDC2 (cycling)	PCLAF
1.45936e-188	0.588936	0.944	0.524	4.89439e-184	cDC2 (cycling)	STMN1
2.63744e-183	0.507722	0.939	0.539	8.84544e-179	cDC2 (cycling)	RAC1
5.62112e-182	0.507715	0.887	0.38	1.88521e-177	cDC2 (cycling)	ITGB2
3.92191e-170	0.506724	0.935	0.499	1.31533e-165	cDC2 (cycling)	PKM
2.58905e-145	0.514415	0.689	0.285	8.68316e-141	cDC2 (cycling)	S100A9
4.03216e-109	0.504431	0.807	0.457	1.35231e-104	cDC2 (cycling)	HIST1H4C
3.65508e-48	-0.566812	0.019	0.203	1.22584e-43	cDC2 (cycling)	IL32
1.58078e-46	-0.52942	0.158	0.338	5.30162e-42	cDC2 (cycling)	CD69
0.000727776	-0.80664	0.321	0.231	1	cDC2 (cycling)	IGKC
0	1.32553	0.887	0.172	0	CDP	MPO
0	0.972921	0.894	0.21	0	CDP	PRSS57
0	0.915681	0.707	0.094	0	CDP	C1QTNF4
0	0.798084	0.737	0.148	0	CDP	SPINK2
0	0.723246	0.773	0.186	0	CDP	IRF8
0	0.690753	0.897	0.358	0	CDP	FABP5
0	0.665034	0.766	0.231	0	CDP	NREP
0	0.652192	0.699	0.132	0	CDP	SMIM24
0	0.618376	0.497	0.034	0	CDP	KCNE5
0	0.61564	0.786	0.257	0	CDP	IGFBP7
0	0.603034	0.684	0.162	0	CDP	PLD4
0	0.56924	0.647	0.121	0	CDP	SPNS3
0	0.516973	0.561	0.109	0	CDP	FLT3
2.58686e-297	0.654326	0.702	0.195	8.6758e-293	CDP	IGLL1
1.42057e-292	0.628076	0.827	0.294	4.7643e-288	CDP	ITM2C
6.3584e-278	0.8754	0.591	0.177	2.13248e-273	CDP	AREG
6.62739e-271	0.742715	0.909	0.447	2.2227e-266	CDP	PLAC8
2.24165e-264	0.516149	0.624	0.185	7.51804e-260	CDP	MGST1
5.04152e-261	0.507093	0.965	0.743	1.69083e-256	CDP	NAP1L1
3.23873e-254	0.545842	0.983	0.696	1.08621e-249	CDP	GSTP1
4.05076e-242	0.559947	0.827	0.312	1.35854e-237	CDP	AC084033.3
1.65375e-234	0.513383	0.749	0.265	5.54634e-230	CDP	BEX3
9.99864e-233	0.580061	0.957	0.572	3.35334e-228	CDP	H2AFY
7.48937e-228	0.573443	0.905	0.467	2.51179e-223	CDP	C1QBP
9.84117e-224	0.595646	0.637	0.226	3.30053e-219	CDP	CLEC11A
2.68404e-223	0.531375	0.982	0.656	9.00174e-219	CDP	LDHB
1.89091e-220	0.633222	0.971	0.523	6.34173e-216	CDP	STMN1
1.71111e-214	0.606904	0.87	0.381	5.73872e-210	CDP	SOX4
8.58092e-212	0.58255	0.896	0.457	2.87787e-207	CDP	NUCB2
1.76522e-207	0.537601	0.92	0.525	5.92021e-203	CDP	PEBP1
1.86985e-204	0.541618	0.809	0.369	6.27109e-200	CDP	IMPDH2
2.84406e-190	0.521392	0.843	0.362	9.53841e-186	CDP	HLA-DMA
1.74865e-180	0.50901	0.952	0.649	5.86462e-176	CDP	ENO1
4.55909e-149	0.505173	0.997	0.73	1.52903e-144	CDP	CD74
8.81526e-147	0.595034	0.983	0.555	2.95646e-142	CDP	HLA-DRA
1.63605e-143	0.519679	0.925	0.48	5.48698e-139	CDP	AIF1
5.13019e-94	-0.560482	0.614	0.712	1.72056e-89	CDP	BTG1
4.23539e-64	-0.632953	0.376	0.524	1.42047e-59	CDP	CD52
2.99314e-50	-0.572534	0.014	0.203	1.00384e-45	CDP	IL32
1.75717e-49	-0.517131	0.273	0.45	5.89319e-45	CDP	S100A10
1.64838e-44	-0.526593	0.092	0.277	5.52833e-40	CDP	LTB
2.93172e-43	-0.522028	0.105	0.289	9.83239e-39	CDP	AC016831.7
8.78447e-31	-0.688764	0.129	0.273	2.94613e-26	CDP	S100A8
1.86238e-29	-0.549016	0.071	0.205	6.24604e-25	CDP	CCL5
3.19595e-28	-0.651741	0.16	0.295	1.07186e-23	CDP	S100A9
4.70441e-28	-0.549573	0.141	0.281	1.57777e-23	CDP	HBA2
3.52524e-27	-1.36264	0.231	0.359	1.1823e-22	CDP	HBB
2.53965e-21	-0.521715	0.165	0.276	8.51747e-17	CDP	HBA1
0	1.23633	0.815	0.192	0	CLP	IGLL1
0	1.09476	0.57	0.079	0	CLP	DNTT
0	1.02633	0.7	0.149	0	CLP	SPINK2
0	0.913124	0.863	0.224	0	CLP	IGHM
0	0.887512	0.898	0.381	0	CLP	SOX4
0	0.88747	0.616	0.086	0	CLP	VPREB1
0	0.876061	0.635	0.098	0	CLP	JCHAIN
0	0.865373	0.647	0.156	0	CLP	FAM30A
0	0.827906	0.686	0.185	0	CLP	ADA
0	0.727077	0.678	0.233	0	CLP	NREP
0	0.711858	0.624	0.133	0	CLP	SMIM24
0	0.590449	0.446	0.06	0	CLP	BAALC
7.82842e-295	0.529061	0.41	0.086	2.6255e-290	CLP	AC002454.1
7.99583e-287	0.700454	0.914	0.574	2.68164e-282	CLP	CD99
1.4362e-266	0.682953	0.708	0.267	4.81673e-262	CLP	BCL11A
1.8428e-265	0.639459	0.529	0.135	6.18037e-261	CLP	CD79A
5.40479e-264	0.556147	0.603	0.167	1.81266e-259	CLP	MZB1
1.39815e-263	0.575217	0.543	0.155	4.68912e-259	CLP	SATB1
2.03244e-260	0.692349	0.545	0.169	6.81641e-256	CLP	UHRF1
2.43831e-239	0.653853	0.694	0.28	8.17759e-235	CLP	LAT2
6.11633e-232	-1.08238	0.261	0.718	2.05129e-227	CLP	S100A6
9.24507e-230	0.676382	0.751	0.348	3.10061e-225	CLP	MSI2
3.08956e-229	0.667806	0.588	0.209	1.03618e-224	CLP	MIR181A1HG
1.46697e-228	0.65983	0.748	0.35	4.91992e-224	CLP	CDK6
5.73428e-209	0.810124	0.667	0.266	1.92316e-204	CLP	LTB
1.28075e-204	0.566594	0.684	0.287	4.29537e-200	CLP	DDAH2
3.22925e-193	0.608562	0.733	0.322	1.08303e-188	CLP	TCF4
1.24993e-190	0.602173	0.914	0.524	4.19202e-186	CLP	STMN1
3.22781e-186	0.618902	0.421	0.117	1.08254e-181	CLP	EBF1
9.23348e-168	0.509122	0.88	0.573	3.09672e-163	CLP	H2AFY
2.75542e-163	0.54052	0.725	0.393	9.24113e-159	CLP	RNASEH2B
1.35541e-160	0.550576	0.54	0.227	4.54577e-156	CLP	ETS2
2.10049e-160	0.520448	0.609	0.26	7.04461e-156	CLP	IGFBP7
4.60491e-155	0.514156	0.667	0.298	1.54439e-150	CLP	ITM2C
5.46199e-149	-0.791798	0.447	0.702	1.83184e-144	CLP	SRGN
2.95521e-147	0.61547	0.659	0.354	9.9112e-143	CLP	ITGA4
5.93288e-131	0.668126	0.615	0.349	1.98977e-126	CLP	ZCCHC7
1.141e-129	-0.840794	0.071	0.454	3.82668e-125	CLP	S100A10
1.37491e-112	-0.641528	0.606	0.733	4.61119e-108	CLP	S100A4
1.23891e-89	-0.522833	0.331	0.601	4.15506e-85	CLP	EMP3
4.1283e-85	-0.6876	0.104	0.39	1.38455e-80	CLP	S100A11
1.952e-84	-0.609155	0.068	0.359	6.54662e-80	CLP	ANXA2
4.48295e-83	-0.62004	0.154	0.436	1.50349e-78	CLP	COTL1
8.94989e-59	-0.603388	0.161	0.375	3.00162e-54	CLP	FCER1G
1.88981e-55	-0.556986	0.117	0.341	6.33803e-51	CLP	BLVRB
2.18314e-52	-0.627689	0.223	0.411	7.32183e-48	CLP	TYROBP
4.86229e-49	-0.556074	0.016	0.203	1.63072e-44	CLP	IL32
3.07553e-46	-0.603401	0.345	0.491	1.03147e-41	CLP	CST3
9.6463e-40	-0.824189	0.202	0.37	3.23518e-35	CLP	LYZ
1.33208e-31	-0.71017	0.15	0.296	4.46752e-27	CLP	S100A9
2.46965e-31	-0.523809	0.063	0.205	8.28271e-27	CLP	CCL5
2.6626e-27	-1.29356	0.21	0.359	8.92983e-23	CLP	HBB
5.79137e-27	-0.673519	0.14	0.273	1.94231e-22	CLP	S100A8
2.79039e-08	-0.912198	0.175	0.233	0.000935842	CLP	IGKC
0	1.35996	0.871	0.048	0	CMP	AVP
0	1.22172	0.965	0.144	0	CMP	SPINK2
0	1.01064	0.857	0.152	0	CMP	FAM30A
0	0.988995	0.76	0.049	0	CMP	CRHBP
0	0.800121	0.816	0.161	0	CMP	HOPX
0	0.794517	0.876	0.331	0	CMP	ANKRD28
0	0.770148	0.737	0.137	0	CMP	CYTL1
0	0.744287	0.839	0.275	0	CMP	EBPL
0	0.681032	0.736	0.185	0	CMP	MLLT3
0	0.67903	0.615	0.092	0	CMP	MSRB3
0	0.672419	0.785	0.213	0	CMP	PRSS57
0	0.669638	0.749	0.195	0	CMP	EGFL7
0	0.668862	0.408	0.014	0	CMP	AC011139.1
0	0.666511	0.605	0.072	0	CMP	NPR3
0	0.66286	0.387	0.039	0	CMP	NKAIN2
0	0.661883	0.422	0.029	0	CMP	CALN1
0	0.658485	0.678	0.123	0	CMP	BEX2
0	0.655359	0.507	0.022	0	CMP	AJ009632.2
0	0.611432	0.988	0.72	0	CMP	ZFAS1
0	0.608648	0.43	0.039	0	CMP	BEX1
0	0.60482	0.61	0.098	0	CMP	CD34
0	0.600967	0.618	0.115	0	CMP	MDK
0	0.581507	0.995	0.754	0	CMP	EIF3E
0	0.568276	0.352	0.033	0	CMP	ZNF385D
0	0.56128	0.585	0.134	0	CMP	SMIM24
0	0.554455	0.508	0.08	0	CMP	ANGPT1
0	0.535475	0.533	0.082	0	CMP	NPDC1
0	0.534249	0.541	0.11	0	CMP	ALDH1A1
0	0.528584	0.411	0.072	0	CMP	MEIS1
0	0.527251	0.563	0.121	0	CMP	LAPTM4B
0	0.520171	0.512	0.098	0	CMP	GUCY1A1
0	0.504403	0.385	0.033	0	CMP	CHRM3
8.76912e-293	0.646539	0.723	0.253	2.94099e-288	CMP	NRIP1
7.94874e-267	0.644889	0.914	0.5	2.66585e-262	CMP	C6orf48
6.91334e-265	0.591636	0.799	0.327	2.3186e-260	CMP	SYPL1
5.78418e-261	0.644767	0.825	0.347	1.9399e-256	CMP	MSI2
1.48713e-257	0.637517	0.826	0.377	4.98755e-253	CMP	SNHG7
2.11791e-252	0.627579	0.846	0.39	7.10306e-248	CMP	BST2
1.46484e-251	0.621374	0.907	0.507	4.91278e-247	CMP	CD164
3.22532e-250	0.58974	0.948	0.553	1.08171e-245	CMP	SNHG8
3.00439e-238	0.531744	0.739	0.265	1.00761e-233	CMP	BEX3
2.27105e-234	0.596285	0.929	0.534	7.61664e-230	CMP	PRDX1
2.67231e-234	0.530975	0.683	0.244	8.96241e-230	CMP	TSC22D1
6.61778e-233	0.638227	0.97	0.479	2.21947e-228	CMP	AIF1
1.21494e-225	0.543329	0.763	0.318	4.07468e-221	CMP	EPB41L4A-AS1
3.57417e-225	0.590995	0.524	0.169	1.19871e-220	CMP	RNF220
5.44207e-225	0.614936	0.92	0.465	1.82516e-220	CMP	SERPINB1
8.38192e-217	0.530585	0.667	0.239	2.81113e-212	CMP	IDS
1.24769e-214	0.55022	0.818	0.377	4.1845e-210	CMP	HSD17B11
5.37101e-193	0.519266	0.896	0.501	1.80133e-188	CMP	RSL1D1
6.21272e-187	0.520026	0.961	0.572	2.08362e-182	CMP	H2AFY
1.34053e-181	0.542132	0.757	0.35	4.49585e-177	CMP	CDK6
2.56537e-180	0.511071	0.817	0.38	8.60374e-176	CMP	ICAM3
1.31312e-152	-0.619078	0.495	0.728	4.40393e-148	CMP	CALM1
1.14936e-121	-0.967406	0.129	0.478	3.85474e-117	CMP	LGALS1
2.93238e-92	-0.714681	0.162	0.452	9.8346e-88	CMP	S100A10
1.40747e-89	-0.817141	0.126	0.413	4.72038e-85	CMP	TYROBP
1.10351e-86	-0.582391	0.685	0.71	3.70095e-82	CMP	S100A6
2.18352e-86	-0.625097	0.261	0.51	7.32309e-82	CMP	HCST
2.25679e-84	-0.54009	0.433	0.594	7.56883e-80	CMP	CORO1A
6.59957e-83	-0.698489	0.097	0.376	2.21336e-78	CMP	FCER1G
3.48235e-81	-0.579038	0.3	0.538	1.16791e-76	CMP	CXCR4
3.9018e-80	-0.528547	0.043	0.321	1.30859e-75	CMP	FYB1
6.81422e-79	-0.602922	0.086	0.359	2.28535e-74	CMP	ANXA2
1.46196e-74	-0.611336	0.19	0.435	4.90311e-70	CMP	COTL1
1.73624e-57	-0.670682	0.103	0.327	5.82301e-53	CMP	NKG7
3.52156e-57	-0.594816	0.187	0.388	1.18106e-52	CMP	S100A11
5.34357e-51	-0.567922	0.012	0.203	1.79213e-46	CMP	IL32
2.41566e-44	-0.756607	0.088	0.274	8.10164e-40	CMP	S100A8
3.43571e-41	-0.758275	0.121	0.296	1.15227e-36	CMP	S100A9
3.63506e-30	-0.525951	0.067	0.205	1.21913e-25	CMP	CCL5
6.64753e-20	-0.743173	0.286	0.368	2.22945e-15	CMP	LYZ
8.84121e-12	-0.959485	0.16	0.234	2.96516e-07	CMP	IGKC
0	1.04111	0.747	0.096	0	Early SOX4+ erythroblast	APOC1
0	0.918081	0.932	0.31	0	Early SOX4+ erythroblast	AC084033.3
0	0.897583	0.752	0.166	0	Early SOX4+ erythroblast	MYC
0	0.834207	0.827	0.135	0	Early SOX4+ erythroblast	CYTL1
0	0.822865	0.897	0.21	0	Early SOX4+ erythroblast	PRSS57
0	0.81943	0.776	0.092	0	Early SOX4+ erythroblast	CNRIP1
0	0.777566	0.912	0.391	0	Early SOX4+ erythroblast	TMEM14C
0	0.763854	0.656	0.124	0	Early SOX4+ erythroblast	HBD
0	0.729859	0.907	0.391	0	Early SOX4+ erythroblast	MPC2
0	0.697128	0.897	0.347	0	Early SOX4+ erythroblast	CDK6
0	0.693941	0.858	0.295	0	Early SOX4+ erythroblast	CYTOR
0	0.688683	0.859	0.327	0	Early SOX4+ erythroblast	BLVRB
0	0.669191	0.802	0.207	0	Early SOX4+ erythroblast	PDZD8
0	0.664805	0.803	0.17	0	Early SOX4+ erythroblast	SLC40A1
0	0.662586	0.69	0.087	0	Early SOX4+ erythroblast	KLF1
0	0.632322	0.764	0.247	0	Early SOX4+ erythroblast	REXO2
0	0.630535	0.83	0.267	0	Early SOX4+ erythroblast	UROD
0	0.63047	0.472	0.057	0	Early SOX4+ erythroblast	FAM178B
0	0.622678	0.848	0.316	0	Early SOX4+ erythroblast	NME4
0	0.620281	0.615	0.11	0	Early SOX4+ erythroblast	ACSM3
0	0.612058	0.843	0.275	0	Early SOX4+ erythroblast	EBPL
0	0.606587	0.814	0.265	0	Early SOX4+ erythroblast	MPST
0	0.603967	0.743	0.172	0	Early SOX4+ erythroblast	SLC39A3
0	0.599936	0.736	0.152	0	Early SOX4+ erythroblast	PKIG
0	0.585367	0.708	0.125	0	Early SOX4+ erythroblast	PRKAR2B
0	0.579219	0.627	0.072	0	Early SOX4+ erythroblast	TFR2
0	0.579175	0.622	0.118	0	Early SOX4+ erythroblast	PVT1
0	0.576689	0.666	0.107	0	Early SOX4+ erythroblast	ALDH1A1
0	0.565568	0.64	0.119	0	Early SOX4+ erythroblast	NFIA
0	0.554282	0.646	0.101	0	Early SOX4+ erythroblast	GATA1
0	0.551703	0.621	0.059	0	Early SOX4+ erythroblast	ITGA2B
0	0.547502	0.763	0.178	0	Early SOX4+ erythroblast	TPM1
0	0.54277	0.745	0.2	0	Early SOX4+ erythroblast	MYB
0	0.541505	0.763	0.248	0	Early SOX4+ erythroblast	DNPH1
0	0.535025	0.432	0.032	0	Early SOX4+ erythroblast	ZNF385D
0	0.533258	0.648	0.157	0	Early SOX4+ erythroblast	SLC39A8
0	0.522395	0.721	0.204	0	Early SOX4+ erythroblast	LYL1
0	0.519729	0.681	0.178	0	Early SOX4+ erythroblast	LMO2
0	0.509724	0.689	0.165	0	Early SOX4+ erythroblast	CD82
0	0.50338	0.624	0.069	0	Early SOX4+ erythroblast	CMBL
0	-0.774851	0.937	0.954	0	Early SOX4+ erythroblast	TMSB4X
2.03966e-307	0.64534	0.901	0.367	6.8406e-303	Early SOX4+ erythroblast	IMPDH2
3.02936e-304	0.626328	0.858	0.334	1.01599e-299	Early SOX4+ erythroblast	HNRNPAB
2.57141e-298	0.588226	0.816	0.287	8.62401e-294	Early SOX4+ erythroblast	NME1
1.62382e-296	0.561088	0.793	0.278	5.44596e-292	Early SOX4+ erythroblast	CDK4
2.89716e-291	0.523576	0.992	0.755	9.71649e-287	Early SOX4+ erythroblast	HSP90AB1
6.26897e-275	0.551932	0.827	0.291	2.10249e-270	Early SOX4+ erythroblast	MARCKSL1
7.81491e-271	0.568995	0.993	0.656	2.62097e-266	Early SOX4+ erythroblast	LDHB
6.73918e-262	0.630797	0.825	0.297	2.26019e-257	Early SOX4+ erythroblast	PCLAF
3.33654e-258	0.592899	0.93	0.466	1.11901e-253	Early SOX4+ erythroblast	C1QBP
1.32779e-252	0.653295	0.938	0.465	4.45313e-248	Early SOX4+ erythroblast	HMGA1
1.34245e-232	0.54676	0.878	0.409	4.50232e-228	Early SOX4+ erythroblast	TIMM13
4.71587e-231	0.551242	0.886	0.424	1.58161e-226	Early SOX4+ erythroblast	TMEM14B
1.90109e-219	0.50274	0.89	0.427	6.37589e-215	Early SOX4+ erythroblast	PRDX2
1.23739e-215	0.575675	0.94	0.51	4.14995e-211	Early SOX4+ erythroblast	HSPD1
3.34881e-215	0.515733	0.981	0.663	1.12312e-210	Early SOX4+ erythroblast	NCL
3.16564e-214	0.537433	0.87	0.402	1.06169e-209	Early SOX4+ erythroblast	CAT
8.73943e-201	0.513353	0.9	0.484	2.93103e-196	Early SOX4+ erythroblast	EIF3A
5.45142e-194	0.547106	0.888	0.503	1.8283e-189	Early SOX4+ erythroblast	RPL22L1
4.37318e-192	0.516244	0.91	0.503	1.46668e-187	Early SOX4+ erythroblast	PA2G4
2.10151e-170	0.525367	0.926	0.505	7.04806e-166	Early SOX4+ erythroblast	DUT
4.82075e-169	0.545479	0.971	0.523	1.61678e-164	Early SOX4+ erythroblast	STMN1
3.04479e-167	-0.657418	0.682	0.778	1.02116e-162	Early SOX4+ erythroblast	CYBA
4.89873e-166	0.525315	0.845	0.382	1.64294e-161	Early SOX4+ erythroblast	SOX4
5.82115e-164	-0.566133	0.785	0.817	1.9523e-159	Early SOX4+ erythroblast	SH3BGRL3
4.37574e-161	-0.843104	0.235	0.598	1.46753e-156	Early SOX4+ erythroblast	CORO1A
1.0843e-146	-0.928542	0.145	0.528	3.63653e-142	Early SOX4+ erythroblast	CD52
2.24881e-138	-0.799169	0.169	0.541	7.54206e-134	Early SOX4+ erythroblast	CXCR4
6.79096e-133	-0.799972	0.152	0.512	2.27755e-128	Early SOX4+ erythroblast	HCST
4.54769e-122	-1.01362	0.137	0.478	1.52521e-117	Early SOX4+ erythroblast	LGALS1
5.1336e-109	-0.612263	0.591	0.718	1.72171e-104	Early SOX4+ erythroblast	VIM
7.07245e-109	-0.894129	0.079	0.414	2.37196e-104	Early SOX4+ erythroblast	TYROBP
2.52015e-106	-0.627036	0.617	0.712	8.45209e-102	Early SOX4+ erythroblast	BTG1
2.50189e-105	-0.585718	0.029	0.365	8.39084e-101	Early SOX4+ erythroblast	CD48
1.61132e-92	-0.74542	0.093	0.39	5.40405e-88	Early SOX4+ erythroblast	S100A11
8.32681e-85	-0.606133	0.252	0.49	2.79265e-80	Early SOX4+ erythroblast	LSP1
3.12017e-81	-0.540411	0.26	0.512	1.04644e-76	Early SOX4+ erythroblast	PKM
1.81484e-74	-0.734346	0.238	0.45	6.08663e-70	Early SOX4+ erythroblast	S100A10
2.43122e-74	-0.739877	0.064	0.327	8.15384e-70	Early SOX4+ erythroblast	NKG7
3.49711e-74	-0.515796	0.088	0.35	1.17286e-69	Early SOX4+ erythroblast	LITAF
9.30317e-70	-0.520649	0.066	0.317	3.1201e-65	Early SOX4+ erythroblast	FYN
1.38549e-69	-0.528811	0.114	0.359	4.64666e-65	Early SOX4+ erythroblast	RCSD1
6.62204e-69	-0.68962	0.142	0.375	2.2209e-64	Early SOX4+ erythroblast	FCER1G
2.64909e-68	-0.520843	0.052	0.298	8.88451e-64	Early SOX4+ erythroblast	SAMHD1
3.93351e-68	-0.547429	0.244	0.477	1.31922e-63	Early SOX4+ erythroblast	ZFP36
4.01709e-66	-0.558516	0.175	0.394	1.34725e-61	Early SOX4+ erythroblast	ITGB2
4.04235e-63	-0.55757	0.19	0.401	1.35572e-58	Early SOX4+ erythroblast	ANKRD44
3.82554e-61	-0.597579	0.051	0.278	1.28301e-56	Early SOX4+ erythroblast	LTB
2.90014e-60	-0.585922	0.145	0.358	9.72649e-56	Early SOX4+ erythroblast	ANXA2
4.29646e-57	-0.536212	0.235	0.422	1.44095e-52	Early SOX4+ erythroblast	PRKCB
1.67158e-51	-0.575141	0.011	0.203	5.60614e-47	Early SOX4+ erythroblast	IL32
1.64514e-43	-0.562665	0.11	0.289	5.51747e-39	Early SOX4+ erythroblast	AC016831.7
5.49953e-38	-0.556809	0.078	0.239	1.84443e-33	Early SOX4+ erythroblast	IGHM
1.48672e-37	-0.78586	0.14	0.296	4.98617e-33	Early SOX4+ erythroblast	S100A9
4.69052e-37	-0.573548	0.049	0.206	1.57311e-32	Early SOX4+ erythroblast	CCL5
1.02343e-34	-0.758165	0.123	0.273	3.43237e-30	Early SOX4+ erythroblast	S100A8
9.12757e-18	-1.06409	0.144	0.234	3.0612e-13	Early SOX4+ erythroblast	IGKC
3.62905e-14	-0.78801	0.34	0.367	1.21711e-09	Early SOX4+ erythroblast	LYZ
0	1.18632	0.889	0.186	0	Effector/Memory CD4 T cell	IL32
0	1.14797	0.896	0.262	0	Effector/Memory CD4 T cell	LTB
0	1.11904	0.767	0.136	0	Effector/Memory CD4 T cell	IL7R
0	1.05917	0.815	0.132	0	Effector/Memory CD4 T cell	CD3D
0	0.980203	0.782	0.147	0	Effector/Memory CD4 T cell	CD3E
0	0.976506	0.695	0.123	0	Effector/Memory CD4 T cell	TRAC
0	0.807206	0.652	0.187	0	Effector/Memory CD4 T cell	TRBC2
0	0.750333	0.535	0.083	0	Effector/Memory CD4 T cell	CD3G
0	0.73157	0.56	0.127	0	Effector/Memory CD4 T cell	CD2
0	0.624755	0.488	0.102	0	Effector/Memory CD4 T cell	SPOCK2
0	0.600933	0.426	0.075	0	Effector/Memory CD4 T cell	BCL11B
0	0.531873	0.33	0.03	0	Effector/Memory CD4 T cell	MAL
1.13415e-304	0.580397	0.394	0.074	3.80371e-300	Effector/Memory CD4 T cell	CAMK4
3.39956e-301	0.801316	0.932	0.513	1.14015e-296	Effector/Memory CD4 T cell	CD52
2.39884e-281	0.610312	0.513	0.124	8.04522e-277	Effector/Memory CD4 T cell	LCK
2.06171e-278	0.704682	0.482	0.114	6.91455e-274	Effector/Memory CD4 T cell	TRBC1
3.85627e-259	0.759471	0.635	0.221	1.29332e-254	Effector/Memory CD4 T cell	TNFAIP3
8.06901e-255	0.770193	0.889	0.602	2.70619e-250	Effector/Memory CD4 T cell	JUNB
2.81574e-241	0.502355	0.292	0.052	9.44343e-237	Effector/Memory CD4 T cell	ANK3
1.22619e-231	0.625434	0.423	0.11	4.11238e-227	Effector/Memory CD4 T cell	INPP4B
7.8232e-226	0.594605	0.955	0.705	2.62374e-221	Effector/Memory CD4 T cell	BTG1
2.0618e-214	-1.26419	0.035	0.574	6.91487e-210	Effector/Memory CD4 T cell	HLA-DRA
8.85654e-207	0.636468	0.506	0.154	2.97031e-202	Effector/Memory CD4 T cell	IFITM1
1.16768e-206	-0.843251	0.246	0.71	3.91615e-202	Effector/Memory CD4 T cell	GSTP1
1.43593e-205	0.549911	0.458	0.131	4.81583e-201	Effector/Memory CD4 T cell	PIK3IP1
2.4684e-205	0.681573	0.744	0.327	8.27852e-201	Effector/Memory CD4 T cell	CD69
1.86305e-200	0.566889	0.913	0.655	6.24831e-196	Effector/Memory CD4 T cell	ZFP36L2
9.50632e-197	0.50108	0.895	0.721	3.18823e-192	Effector/Memory CD4 T cell	SARAF
4.34653e-196	0.619431	0.508	0.164	1.45774e-191	Effector/Memory CD4 T cell	RORA
4.82851e-194	-0.931436	0.03	0.546	1.61938e-189	Effector/Memory CD4 T cell	ZEB2
6.86541e-191	0.531506	0.435	0.129	2.30252e-186	Effector/Memory CD4 T cell	TCF7
4.56021e-188	0.527585	0.397	0.107	1.5294e-183	Effector/Memory CD4 T cell	TC2N
4.70355e-178	-0.890086	0.408	0.742	1.57748e-173	Effector/Memory CD4 T cell	CD74
7.63395e-174	-1.07846	0.02	0.497	2.56027e-169	Effector/Memory CD4 T cell	CST3
1.11755e-173	0.631835	0.598	0.249	3.74805e-169	Effector/Memory CD4 T cell	KLF2
1.06703e-172	0.654584	0.596	0.256	3.57862e-168	Effector/Memory CD4 T cell	CRIP1
4.11196e-167	0.593658	0.85	0.536	1.37907e-162	Effector/Memory CD4 T cell	TSC22D3
2.65894e-163	-0.931658	0.088	0.54	8.91754e-159	Effector/Memory CD4 T cell	STMN1
1.41009e-155	-0.878201	0.055	0.497	4.72917e-151	Effector/Memory CD4 T cell	AIF1
7.3826e-148	0.593269	0.659	0.374	2.47598e-143	Effector/Memory CD4 T cell	LEPROTL1
2.01577e-142	0.542088	0.664	0.353	6.76049e-138	Effector/Memory CD4 T cell	CD48
8.71889e-142	-0.727045	0.004	0.421	2.92414e-137	Effector/Memory CD4 T cell	MEF2C
7.73424e-139	-0.825602	0.078	0.497	2.59391e-134	Effector/Memory CD4 T cell	HLA-DRB1
1.10815e-137	0.557816	0.704	0.434	3.71651e-133	Effector/Memory CD4 T cell	AES
2.78163e-131	-0.650908	0.193	0.586	9.32903e-127	Effector/Memory CD4 T cell	H2AFY
1.30833e-125	0.52768	0.659	0.367	4.38787e-121	Effector/Memory CD4 T cell	EVL
1.08285e-124	-0.669891	0.007	0.39	3.63166e-120	Effector/Memory CD4 T cell	LYN
3.12913e-123	-0.88882	0.034	0.415	1.04945e-118	Effector/Memory CD4 T cell	TYROBP
1.18602e-122	-0.701512	0.015	0.398	3.97766e-118	Effector/Memory CD4 T cell	SOX4
1.66183e-121	0.519519	0.613	0.31	5.57346e-117	Effector/Memory CD4 T cell	FYB1
2.05239e-113	0.5208	0.394	0.133	6.88331e-109	Effector/Memory CD4 T cell	KLRB1
4.24118e-111	-0.581974	0.02	0.378	1.42241e-106	Effector/Memory CD4 T cell	HLA-DMA
5.54075e-111	-0.59332	0.183	0.557	1.85826e-106	Effector/Memory CD4 T cell	TKT
6.27893e-111	-0.708643	0.135	0.498	2.10583e-106	Effector/Memory CD4 T cell	HLA-DPA1
1.02893e-110	-0.577783	0.052	0.421	3.45084e-106	Effector/Memory CD4 T cell	RNF130
3.15904e-110	-0.550132	0	0.347	1.05948e-105	Effector/Memory CD4 T cell	SYK
7.31076e-110	-0.703531	0.244	0.581	2.45188e-105	Effector/Memory CD4 T cell	TUBB
1.0179e-108	-0.755963	0.027	0.377	3.41382e-104	Effector/Memory CD4 T cell	FCER1G
1.96464e-106	-0.675248	0.367	0.65	6.58902e-102	Effector/Memory CD4 T cell	TUBA1B
2.14368e-102	-0.528776	0.027	0.37	7.18947e-98	Effector/Memory CD4 T cell	YBX3
4.56861e-102	-0.604557	0.006	0.336	1.53222e-97	Effector/Memory CD4 T cell	TCF4
1.71707e-99	-0.560134	0.036	0.374	5.75872e-95	Effector/Memory CD4 T cell	FABP5
1.72697e-99	-0.66431	0.174	0.515	5.7919e-95	Effector/Memory CD4 T cell	HLA-DPB1
6.66222e-98	-0.500029	0.076	0.429	2.23438e-93	Effector/Memory CD4 T cell	APLP2
7.0803e-98	-0.596786	0.145	0.481	2.37459e-93	Effector/Memory CD4 T cell	HMGA1
4.21674e-93	-0.532829	0.129	0.472	1.41421e-88	Effector/Memory CD4 T cell	NUCB2
3.56826e-92	-0.553027	0.191	0.536	1.19672e-87	Effector/Memory CD4 T cell	PSAP
3.5752e-92	-0.503502	0.215	0.557	1.19905e-87	Effector/Memory CD4 T cell	TALDO1
4.46313e-91	-0.577951	0.009	0.313	1.49684e-86	Effector/Memory CD4 T cell	PCLAF
1.03636e-90	-0.540553	0.211	0.549	3.47574e-86	Effector/Memory CD4 T cell	CD63
1.29542e-88	-0.991008	0.064	0.372	4.34459e-84	Effector/Memory CD4 T cell	LYZ
1.63776e-88	-0.545811	0.02	0.324	5.49271e-84	Effector/Memory CD4 T cell	PLEK
3.16086e-84	-0.576334	0.094	0.406	1.06009e-79	Effector/Memory CD4 T cell	LST1
5.94784e-82	-0.617924	0.046	0.343	1.99479e-77	Effector/Memory CD4 T cell	BLVRB
2.16693e-81	-0.502626	0.005	0.284	7.26744e-77	Effector/Memory CD4 T cell	TYMS
2.35211e-77	-0.513802	0.225	0.524	7.8885e-73	Effector/Memory CD4 T cell	HSPD1
9.71851e-61	-0.5334	0.029	0.259	3.25939e-56	Effector/Memory CD4 T cell	AFF3
6.1131e-60	-0.609892	0.082	0.327	2.05021e-55	Effector/Memory CD4 T cell	NKG7
2.7791e-59	-0.776632	0.063	0.297	9.32056e-55	Effector/Memory CD4 T cell	S100A9
4.43761e-56	-0.570955	0.026	0.24	1.48829e-51	Effector/Memory CD4 T cell	IGHM
2.37747e-55	-0.537097	0.005	0.208	7.97357e-51	Effector/Memory CD4 T cell	IGLL1
6.96898e-48	-0.717382	0.07	0.274	2.33726e-43	Effector/Memory CD4 T cell	S100A8
6.27341e-46	-0.5208	0.012	0.189	2.10398e-41	Effector/Memory CD4 T cell	MPO
1.16392e-05	-0.699441	0.412	0.355	0.390355	Effector/Memory CD4 T cell	HBB
0.000696481	-0.79315	0.191	0.233	1	Effector/Memory CD4 T cell	IGKC
0	4.93045	0.985	0.344	0	Erythrocyte	HBB
0	2.58999	0.89	0.07	0	Erythrocyte	CA1
0	2.58114	0.985	0.119	0	Erythrocyte	AHSP
0	2.19174	0.987	0.425	0	Erythrocyte	PRDX2
0	2.01676	0.866	0.12	0	Erythrocyte	HBD
0	2.01582	0.983	0.325	0	Erythrocyte	BLVRB
0	1.95139	0.963	0.26	0	Erythrocyte	HBA1
0	1.66811	0.886	0.267	0	Erythrocyte	HBA2
0	1.54923	0.82	0.05	0	Erythrocyte	FAM178B
0	1.37855	0.999	0.963	0	Erythrocyte	FTH1
0	1.36032	0.976	0.571	0	Erythrocyte	ATP5IF1
0	1.34859	0.994	0.87	0	Erythrocyte	HMGB1
0	1.27684	0.805	0.21	0	Erythrocyte	SYNGR1
0	1.24307	0.496	0.989	0	Erythrocyte	MALAT1
0	1.22246	0.822	0.246	0	Erythrocyte	REXO2
0	1.21847	0.991	0.704	0	Erythrocyte	S100A6
0	1.19881	0.981	0.638	0	Erythrocyte	TUBA1B
0	1.17781	0.967	0.567	0	Erythrocyte	TUBB
0	1.17525	0.999	0.975	0	Erythrocyte	RPL8
0	1.15863	0.765	0.128	0	Erythrocyte	CA2
0	1.1283	0.882	0.392	0	Erythrocyte	TMEM14C
0	1.12323	0.989	0.848	0	Erythrocyte	YBX1
0	1.121	0.677	0.105	0	Erythrocyte	AKR1C3
0	1.11409	0.894	0.296	0	Erythrocyte	PCLAF
0	1.10499	0.945	0.535	0	Erythrocyte	GYPC
0	1.10393	0.998	0.961	0	Erythrocyte	RPL14
0	1.09003	0.999	0.966	0	Erythrocyte	RPL37A
0	1.08337	0.845	0.266	0	Erythrocyte	UROD
0	1.07439	0.841	0.316	0	Erythrocyte	NME4
0	1.07086	0.679	0.087	0	Erythrocyte	KLF1
0	1.06743	0.631	0.052	0	Erythrocyte	KCNH2
0	1.05213	0.999	0.979	0	Erythrocyte	RPL21
0	1.01475	0.675	0.061	0	Erythrocyte	GYPA
0	1.01173	0.865	0.425	0	Erythrocyte	TMEM14B
0	1.0058	0.714	0.147	0	Erythrocyte	HMBS
0	0.979293	0.85	0.392	0	Erythrocyte	MPC2
0	0.968213	0.799	0.27	0	Erythrocyte	PCNA
0	0.960037	0.829	0.431	0	Erythrocyte	METAP2
0	0.953791	0.665	0.09	0	Erythrocyte	MYL4
0	0.951998	0.656	0.098	0	Erythrocyte	APOC1
0	0.94293	0.674	0.107	0	Erythrocyte	SMIM1
0	0.937287	0.675	0.204	0	Erythrocyte	LMNA
0	0.935508	0.654	0.175	0	Erythrocyte	UBAC1
0	0.916909	0.605	0.109	0	Erythrocyte	ALDH1A1
0	0.900939	0.468	0.083	0	Erythrocyte	HBM
0	0.870083	0.88	0.492	0	Erythrocyte	RANBP1
0	0.853347	0.617	0.139	0	Erythrocyte	HMGN5
0	0.846547	0.652	0.215	0	Erythrocyte	HEBP1
0	0.836272	0.567	0.067	0	Erythrocyte	ALAS2
0	0.825316	0.819	0.42	0	Erythrocyte	SLIRP
0	0.822203	0.695	0.244	0	Erythrocyte	TFDP1
0	0.803814	0.681	0.192	0	Erythrocyte	OAT
0	0.780395	0.476	0.047	0	Erythrocyte	EPCAM
0	0.773422	0.673	0.222	0	Erythrocyte	BOLA3
0	0.762872	0.552	0.066	0	Erythrocyte	HBQ1
0	0.733491	0.608	0.125	0	Erythrocyte	FECH
0	0.700698	0.562	0.102	0	Erythrocyte	GATA1
0	0.685893	0.489	0.108	0	Erythrocyte	HEMGN
0	0.658393	0.488	0.07	0	Erythrocyte	TSPAN17
0	0.653577	0.434	0.06	0	Erythrocyte	GYPB
0	0.649224	0.395	0.04	0	Erythrocyte	ADD2
0	0.631011	0.468	0.072	0	Erythrocyte	RFESD
0	0.52725	0.423	0.08	0	Erythrocyte	GFI1B
0	0.508785	0.331	0.032	0	Erythrocyte	PKLR
0	0.503661	0.363	0.051	0	Erythrocyte	HES6
0	0.503649	0.376	0.053	0	Erythrocyte	EPB42
0	-0.954958	0.414	0.861	0	Erythrocyte	ACTG1
0	-1.03106	0.286	0.851	0	Erythrocyte	HLA-A
0	-1.03815	0.325	0.879	0	Erythrocyte	HLA-B
0	-1.13525	0.2	0.828	0	Erythrocyte	SH3BGRL3
0	-1.14391	0.055	0.743	0	Erythrocyte	HLA-E
0	-1.22705	0.498	0.962	0	Erythrocyte	TMSB4X
0	-1.25603	0.098	0.79	0	Erythrocyte	CYBA
0	-1.35948	0.062	0.728	0	Erythrocyte	VIM
5.76035e-308	0.905843	0.823	0.429	1.9319e-303	Erythrocyte	ATP5MC1
1.7413e-306	0.581458	0.449	0.098	5.83998e-302	Erythrocyte	CNRIP1
2.5217e-300	0.935703	0.867	0.504	8.45727e-296	Erythrocyte	PA2G4
7.69636e-300	-1.34263	0.151	0.747	2.58121e-295	Erythrocyte	CD74
1.51677e-297	0.71622	0.584	0.169	5.08695e-293	Erythrocyte	BIRC5
4.47091e-295	0.893834	0.924	0.619	1.49946e-290	Erythrocyte	RAN
1.38094e-292	0.82294	0.991	0.914	4.63141e-288	Erythrocyte	RPL4
3.95433e-292	0.771584	0.484	0.12	1.3262e-287	Erythrocyte	PVT1
4.81743e-291	0.918584	0.964	0.655	1.61567e-286	Erythrocyte	HMGB2
1.55766e-289	-1.1085	0.097	0.722	5.22406e-285	Erythrocyte	BTG1
2.18936e-288	-0.594334	0.749	0.949	7.34266e-284	Erythrocyte	TMSB10
1.30284e-286	0.886878	0.857	0.504	4.36945e-282	Erythrocyte	RPL22L1
7.4654e-284	0.721463	0.885	0.548	2.50375e-279	Erythrocyte	SNRPG
6.40812e-282	0.804587	0.998	0.965	2.14916e-277	Erythrocyte	RPL35
1.8957e-278	1.15716	0.994	0.936	6.3578e-274	Erythrocyte	RPLP0
2.06238e-278	0.698067	0.381	0.072	6.91682e-274	Erythrocyte	RHAG
1.17531e-277	0.65153	0.505	0.137	3.94175e-273	Erythrocyte	CCNB2
1.50013e-275	1.31084	0.998	0.98	5.03114e-271	Erythrocyte	RPS6
1.76105e-274	0.841545	0.722	0.298	5.9062e-270	Erythrocyte	CKS2
1.5347e-273	0.762552	0.837	0.502	5.14709e-269	Erythrocyte	NOP10
1.32084e-272	0.661222	0.466	0.116	4.42982e-268	Erythrocyte	CDC20
1.9683e-272	0.815129	0.699	0.289	6.60127e-268	Erythrocyte	NME1
5.41232e-272	1.39998	0.631	0.99	1.81518e-267	Erythrocyte	MT-CO1
1.48419e-269	0.781689	0.872	0.59	4.97767e-265	Erythrocyte	SOD1
4.33609e-267	-0.872086	0.334	0.802	1.45424e-262	Erythrocyte	ARHGDIB
3.70897e-266	0.882644	0.752	0.336	1.24391e-261	Erythrocyte	TUBB4B
1.45983e-264	1.70526	0.999	0.967	4.89596e-260	Erythrocyte	RPS2
5.73561e-263	0.90456	0.876	0.506	1.92361e-258	Erythrocyte	DUT
2.55707e-261	0.67485	0.593	0.204	8.5759e-257	Erythrocyte	MRPL12
3.09537e-261	1.39399	0.521	0.971	1.03813e-256	Erythrocyte	MT-ATP6
4.3822e-258	0.937841	0.62	0.221	1.4697e-253	Erythrocyte	GLRX5
3.41891e-257	1.36952	0.274	0.043	1.14664e-252	Erythrocyte	SLC25A21
1.06425e-256	0.632759	0.887	0.613	3.56928e-252	Erythrocyte	ATP5MF
3.497e-256	1.25469	0.65	0.208	1.17282e-251	Erythrocyte	CD36
1.34102e-255	1.04573	0.995	0.942	4.49751e-251	Erythrocyte	RPS5
1.55471e-255	0.76892	0.838	0.523	5.21417e-251	Erythrocyte	SNRPD1
2.63564e-255	0.67253	0.561	0.185	8.83941e-251	Erythrocyte	BLVRA
7.80411e-255	0.797208	0.722	0.27	2.61734e-250	Erythrocyte	TYMS
1.07415e-254	0.71456	0.597	0.212	3.60247e-250	Erythrocyte	FKBP4
6.95801e-254	0.78745	0.862	0.518	2.33358e-249	Erythrocyte	HSPE1
9.09335e-247	0.836684	0.999	0.97	3.04973e-242	Erythrocyte	RPL36
3.88139e-245	0.638261	0.459	0.123	1.30174e-240	Erythrocyte	MINPP1
8.10832e-242	-1.02878	0.014	0.602	2.71937e-237	Erythrocyte	CORO1A
8.6046e-242	0.520523	0.451	0.122	2.88581e-237	Erythrocyte	FXN
1.58969e-241	0.719936	0.723	0.338	5.33151e-237	Erythrocyte	RPA3
2.67752e-241	0.719245	0.861	0.552	8.97988e-237	Erythrocyte	SNRPE
1.18954e-240	0.539525	0.445	0.121	3.9895e-236	Erythrocyte	TUBG1
3.48715e-239	0.691202	0.634	0.249	1.16952e-234	Erythrocyte	UROS
7.25477e-239	0.686984	0.563	0.2	2.4331e-234	Erythrocyte	GAR1
5.96743e-238	0.673737	0.886	0.624	2.00136e-233	Erythrocyte	NDUFS5
4.90984e-237	0.662645	0.42	0.107	1.64666e-232	Erythrocyte	CCNB1
2.08502e-236	-0.888958	0.156	0.688	6.99273e-232	Erythrocyte	FXYD5
3.15541e-236	0.799942	0.867	0.586	1.05826e-231	Erythrocyte	EIF5A
3.46595e-235	0.788419	0.843	0.467	1.16241e-230	Erythrocyte	HMGA1
3.72839e-233	1.402	0.575	0.977	1.25043e-228	Erythrocyte	MT-ND4
2.22544e-231	1.12889	0.979	0.894	7.4637e-227	Erythrocyte	RPL23
2.84801e-231	0.557761	0.404	0.1	9.55166e-227	Erythrocyte	GCLM
4.06377e-231	1.47423	0.532	0.957	1.36291e-226	Erythrocyte	MT-CYB
2.36408e-230	1.35706	0.999	0.98	7.92865e-226	Erythrocyte	PTMA
2.51687e-230	-0.786285	0.414	0.83	8.44108e-226	Erythrocyte	HLA-C
2.09964e-229	0.737533	0.888	0.643	7.04176e-225	Erythrocyte	PTGES3
2.32175e-228	0.74937	0.589	0.199	7.7867e-224	Erythrocyte	SNCA
3.92215e-228	0.654027	0.68	0.289	1.31541e-223	Erythrocyte	SLC25A39
2.53568e-223	0.53627	0.498	0.153	8.50418e-219	Erythrocyte	STRADB
2.90245e-223	0.702737	0.819	0.51	9.73423e-219	Erythrocyte	PSMA4
3.67246e-223	0.641697	0.54	0.193	1.23167e-218	Erythrocyte	ISOC2
1.04779e-221	0.745629	0.749	0.412	3.51406e-217	Erythrocyte	TIMM13
1.88876e-220	0.509186	0.402	0.107	6.33452e-216	Erythrocyte	ARV1
4.63239e-218	1.64557	0.639	0.987	1.55361e-213	Erythrocyte	MT-CO2
1.19588e-217	0.86065	0.751	0.403	4.01075e-213	Erythrocyte	CCT6A
6.87285e-217	0.785465	0.576	0.969	2.30502e-212	Erythrocyte	MT-ND3
3.74997e-216	0.5066	0.992	0.921	1.25767e-211	Erythrocyte	RPL31
2.0919e-215	-0.717015	0.366	0.78	7.01583e-211	Erythrocyte	ARPC2
3.29726e-214	0.643202	0.336	0.076	1.10584e-209	Erythrocyte	NMNAT3
1.94893e-213	0.50658	0.443	0.123	6.53631e-209	Erythrocyte	FAM210B
1.13622e-212	0.727962	0.762	0.438	3.81067e-208	Erythrocyte	GADD45GIP1
2.64771e-212	0.592111	0.869	0.61	8.8799e-208	Erythrocyte	UQCRQ
3.33471e-212	-0.886759	0.065	0.611	1.11839e-207	Erythrocyte	PTPRC
4.06098e-212	0.541536	0.963	0.733	1.36197e-207	Erythrocyte	RPS17
1.03941e-211	1.02722	0.99	0.935	3.48598e-207	Erythrocyte	RPSA
1.80066e-211	-0.890537	0.078	0.61	6.03904e-207	Erythrocyte	CD37
2.13254e-211	0.700206	0.66	0.275	7.15211e-207	Erythrocyte	MCM7
3.07366e-210	1.30012	1	0.988	1.03084e-205	Erythrocyte	RPS12
7.06952e-209	0.676152	0.64	0.283	2.37097e-204	Erythrocyte	TPGS2
1.94657e-207	-0.764006	0.244	0.711	6.52842e-203	Erythrocyte	GMFG
7.44721e-206	0.564326	0.991	0.958	2.49764e-201	Erythrocyte	RPL26
8.66991e-205	0.663562	0.641	0.281	2.90772e-200	Erythrocyte	CDK4
2.66415e-204	0.769003	0.703	0.337	8.93501e-200	Erythrocyte	GLRX
3.42111e-204	-0.954287	0.25	0.706	1.14737e-199	Erythrocyte	SRGN
1.44598e-200	0.597176	0.922	0.717	4.84953e-196	Erythrocyte	CALM2
1.26042e-199	0.916615	0.982	0.725	4.2272e-195	Erythrocyte	S100A4
2.73281e-197	0.955216	0.967	0.831	9.1653e-193	Erythrocyte	NPM1
7.32825e-197	-0.929277	0.037	0.551	2.45775e-192	Erythrocyte	TSC22D3
6.13416e-196	0.589837	0.995	0.945	2.05727e-191	Erythrocyte	RPL27
2.40204e-195	-1.05513	0.087	0.587	8.05595e-191	Erythrocyte	FOS
2.07805e-194	1.52071	0.517	0.937	6.96936e-190	Erythrocyte	MT-ND1
1.06033e-193	-0.93108	0.035	0.543	3.55615e-189	Erythrocyte	CXCR4
5.63753e-193	0.610831	0.541	0.2	1.89071e-188	Erythrocyte	CENPU
2.22168e-192	1.04357	0.993	0.946	7.45106e-188	Erythrocyte	RPL27A
9.25151e-192	0.652072	0.633	0.275	3.10277e-187	Erythrocyte	DNAJC9
1.14738e-191	0.9714	0.997	0.957	3.84808e-187	Erythrocyte	RPS16
2.20696e-191	0.504272	0.388	0.105	7.40171e-187	Erythrocyte	DLGAP5
2.20875e-191	0.622886	0.828	0.551	7.4077e-187	Erythrocyte	SNRPF
3.62058e-191	-0.808151	0.036	0.547	1.21427e-186	Erythrocyte	CELF2
7.60016e-191	0.617404	0.847	0.585	2.54894e-186	Erythrocyte	ERH
1.15635e-189	0.782765	0.757	0.398	3.87816e-185	Erythrocyte	CAST
1.97583e-189	0.619535	0.689	0.344	6.62655e-185	Erythrocyte	PRDX3
2.15332e-189	0.962299	0.845	0.512	7.22182e-185	Erythrocyte	HSPD1
4.11736e-189	0.896036	0.861	0.61	1.38088e-184	Erythrocyte	SERBP1
7.83329e-188	0.62816	0.643	0.302	2.62713e-183	Erythrocyte	TAF9
2.87514e-187	-0.919369	0.015	0.515	9.64265e-183	Erythrocyte	HCST
7.35392e-185	-0.838395	0.019	0.517	2.46636e-180	Erythrocyte	PKM
1.95078e-184	0.744879	0.744	0.419	6.54251e-180	Erythrocyte	CCT2
2.87703e-184	0.688927	0.692	0.366	9.64898e-180	Erythrocyte	VDAC3
5.16242e-184	0.653381	0.597	0.269	1.73137e-179	Erythrocyte	MPST
1.63816e-183	0.817778	0.934	0.64	5.49408e-179	Erythrocyte	H2AFZ
2.23776e-183	0.543333	0.509	0.189	7.505e-179	Erythrocyte	CENPH
1.80305e-182	-0.980892	0.042	0.53	6.04708e-178	Erythrocyte	CD52
1.73473e-181	1.28492	0.996	0.959	5.81792e-177	Erythrocyte	RPL7A
4.24775e-181	-1.09426	0.104	0.572	1.42461e-176	Erythrocyte	HLA-DRA
1.33825e-178	0.533293	0.861	0.642	4.48821e-174	Erythrocyte	COX7B
3.32711e-178	-0.951486	0.064	0.549	1.11585e-173	Erythrocyte	JUN
5.67146e-177	0.619841	0.683	0.365	1.90209e-172	Erythrocyte	TIMM8B
6.09315e-177	0.882296	0.995	0.967	2.04352e-172	Erythrocyte	RPL6
1.00483e-176	0.551871	0.543	0.216	3.37001e-172	Erythrocyte	CENPW
2.22146e-175	0.979368	0.991	0.883	7.45034e-171	Erythrocyte	RPS20
2.70386e-175	2.14965	0.666	0.984	9.0682e-171	Erythrocyte	MT-CO3
5.25865e-175	-0.834871	0.014	0.495	1.76365e-170	Erythrocyte	LSP1
6.43665e-175	0.567435	0.499	0.192	2.15872e-170	Erythrocyte	PSMG1
4.66871e-173	-0.82609	0.042	0.516	1.56579e-168	Erythrocyte	IFITM2
1.62555e-172	-0.815243	0.081	0.559	5.45176e-168	Erythrocyte	KLF6
7.29461e-171	0.597818	0.636	0.308	2.44647e-166	Erythrocyte	HPRT1
1.83097e-170	0.65009	0.826	0.558	6.14072e-166	Erythrocyte	SNRPB
2.07722e-170	1.41211	0.963	0.82	6.96657e-166	Erythrocyte	HSP90AA1
1.10728e-169	-0.723395	0.287	0.692	3.71361e-165	Erythrocyte	LAPTM5
1.17557e-169	-0.933924	0.03	0.497	3.94263e-165	Erythrocyte	AIF1
1.18868e-169	0.713771	0.998	0.98	3.98659e-165	Erythrocyte	RPL35A
4.29239e-169	0.660433	0.876	0.629	1.43958e-164	Erythrocyte	ATP5MC3
5.72279e-169	0.590288	0.766	0.474	1.91931e-164	Erythrocyte	LSM5
2.18981e-168	0.690119	0.587	0.262	7.34419e-164	Erythrocyte	PAICS
7.2927e-168	0.508853	0.441	0.142	2.44583e-163	Erythrocyte	CDK1
1.10984e-167	1.05225	0.99	0.942	3.72219e-163	Erythrocyte	RPL5
1.2326e-167	0.639582	0.725	0.424	4.13389e-163	Erythrocyte	SRI
2.9361e-167	-0.911309	0.055	0.517	9.84709e-163	Erythrocyte	HLA-DPB1
5.73877e-167	0.626665	0.673	0.363	1.92467e-162	Erythrocyte	ECH1
2.00301e-166	0.566302	0.958	0.839	6.71768e-162	Erythrocyte	UBB
4.92937e-166	0.591362	0.644	0.31	1.65321e-161	Erythrocyte	YWHAH
5.75594e-166	0.539037	0.547	0.227	1.93043e-161	Erythrocyte	HMGB3
6.27284e-166	0.623514	0.545	0.224	2.10378e-161	Erythrocyte	PARVB
1.01471e-165	0.96372	0.995	0.967	3.40312e-161	Erythrocyte	RPL29
2.49077e-164	0.56356	0.545	0.233	8.35356e-160	Erythrocyte	TMEM141
4.06234e-164	0.721136	0.999	0.98	1.36243e-159	Erythrocyte	RPS15A
5.29243e-164	0.56276	0.613	0.298	1.77498e-159	Erythrocyte	VBP1
2.44798e-162	0.643801	0.997	0.974	8.21004e-158	Erythrocyte	RPS25
7.1172e-162	0.648474	0.578	0.252	2.38697e-157	Erythrocyte	RCC1
4.67441e-161	-0.736192	0.087	0.547	1.5677e-156	Erythrocyte	LCP1
8.42762e-161	0.605651	0.631	0.32	2.82646e-156	Erythrocyte	NDUFAF8
4.09108e-160	0.562021	0.599	0.283	1.37207e-155	Erythrocyte	UQCC2
5.17791e-160	0.79843	0.994	0.957	1.73657e-155	Erythrocyte	RPL24
2.43106e-159	-0.688836	0.162	0.611	8.15328e-155	Erythrocyte	PNRC1
3.12447e-159	-0.881303	0.052	0.5	1.04789e-154	Erythrocyte	HLA-DPA1
3.18342e-159	0.650478	0.581	0.25	1.06766e-154	Erythrocyte	PTTG1
6.14535e-159	0.746442	0.237	0.05	2.06103e-154	Erythrocyte	SLC35F1
7.25363e-159	-0.508252	0.113	0.625	2.43272e-154	Erythrocyte	NEAT1
2.82442e-158	0.570261	0.494	0.192	9.47255e-154	Erythrocyte	GMNN
8.38826e-157	-1.04293	0.035	0.48	2.81326e-152	Erythrocyte	LGALS1
9.11637e-157	0.689957	0.732	0.456	3.05745e-152	Erythrocyte	SSB
2.33785e-156	0.549473	0.894	0.703	7.84069e-152	Erythrocyte	SRSF3
5.445e-156	0.941061	0.442	0.883	1.82614e-151	Erythrocyte	MT-ND5
1.03945e-155	0.675252	0.623	0.319	3.48612e-151	Erythrocyte	PPA2
2.60541e-155	0.576291	0.548	0.248	8.73802e-151	Erythrocyte	DDX1
2.91217e-155	0.587782	0.734	0.461	9.76684e-151	Erythrocyte	FIS1
5.25543e-155	0.698369	0.761	0.47	1.76257e-150	Erythrocyte	C1QBP
7.13381e-155	0.658425	0.723	0.405	2.39254e-150	Erythrocyte	CAT
1.31812e-154	-0.79023	0.039	0.481	4.42072e-150	Erythrocyte	ZFP36
3.65022e-154	-0.673771	0.017	0.464	1.22421e-149	Erythrocyte	FNBP1
3.34087e-153	-0.753097	0.094	0.538	1.12046e-148	Erythrocyte	IER2
1.07525e-152	0.567784	0.808	0.56	3.60617e-148	Erythrocyte	RBX1
2.1435e-152	0.516263	0.496	0.199	7.18887e-148	Erythrocyte	EEF1E1
3.53691e-152	0.55844	0.736	0.461	1.18621e-147	Erythrocyte	LSM3
4.0571e-152	1.22291	0.998	0.951	1.36067e-147	Erythrocyte	RPL13A
1.1183e-151	-0.669147	0.039	0.478	3.75055e-147	Erythrocyte	GPSM3
1.20833e-151	0.564963	0.632	0.337	4.0525e-147	Erythrocyte	POLR2F
1.14945e-150	0.512609	0.417	0.149	3.85502e-146	Erythrocyte	PCCB
3.87308e-150	0.593324	0.668	0.349	1.29895e-145	Erythrocyte	FBXO7
7.20023e-150	0.546059	0.586	0.287	2.41481e-145	Erythrocyte	LAGE3
1.3457e-149	-0.846172	0.062	0.497	4.51319e-145	Erythrocyte	HLA-DRB1
1.39311e-149	0.64275	0.699	0.413	4.67223e-145	Erythrocyte	MRPL51
6.89536e-149	-0.625729	0.151	0.596	2.31256e-144	Erythrocyte	LRRFIP1
1.04667e-147	0.962325	0.996	0.977	3.51031e-143	Erythrocyte	RPL12
3.75758e-147	0.558663	0.609	0.281	1.26022e-142	Erythrocyte	CKS1B
4.35018e-147	0.565969	0.636	0.336	1.45896e-142	Erythrocyte	PSMC3
1.79809e-146	0.579919	0.691	0.41	6.03043e-142	Erythrocyte	SNRPC
3.77459e-145	-0.777316	0.209	0.615	1.26592e-140	Erythrocyte	JUNB
1.04608e-144	1.23781	0.999	0.981	3.50834e-140	Erythrocyte	RPS3A
5.71789e-144	0.924431	0.437	0.156	1.91767e-139	Erythrocyte	MBOAT2
7.79413e-144	0.562163	0.687	0.371	2.614e-139	Erythrocyte	IMPDH2
6.64636e-143	0.638565	0.621	0.332	2.22906e-138	Erythrocyte	ATG3
8.10781e-143	0.518759	0.82	0.608	2.7192e-138	Erythrocyte	POMP
1.29548e-142	0.535443	0.518	0.21	4.34477e-138	Erythrocyte	TESC
2.51857e-142	0.537445	0.508	0.227	8.44678e-138	Erythrocyte	RUVBL2
2.74339e-142	0.786789	0.994	0.956	9.2008e-138	Erythrocyte	RPS21
2.57055e-141	-0.555859	0.263	0.693	8.6211e-137	Erythrocyte	YWHAZ
2.42273e-140	0.588635	0.849	0.603	8.12534e-136	Erythrocyte	TXN
3.08085e-139	-0.752316	0.025	0.438	1.03326e-134	Erythrocyte	COTL1
4.94207e-139	0.587811	0.827	0.586	1.65747e-134	Erythrocyte	ATP5F1B
2.286e-138	0.633096	0.653	0.374	7.66677e-134	Erythrocyte	PHB
2.57269e-138	-0.636329	0.024	0.437	8.6283e-134	Erythrocyte	CD53
6.09911e-138	0.569565	0.902	0.729	2.04552e-133	Erythrocyte	UQCRH
8.0552e-138	-0.65689	0.064	0.488	2.70155e-133	Erythrocyte	AKAP13
1.01906e-137	-0.653954	0.135	0.546	3.41773e-133	Erythrocyte	LIMD2
2.82053e-137	0.501585	0.478	0.183	9.45951e-133	Erythrocyte	TPM1
4.10338e-137	0.630231	0.608	0.3	1.37619e-132	Erythrocyte	CYTOR
2.11445e-136	0.517959	0.588	0.287	7.09146e-132	Erythrocyte	C20orf27
7.369e-136	-0.622062	0.083	0.5	2.47142e-131	Erythrocyte	2023-09-06
2.45781e-135	0.524616	0.448	0.181	8.243e-131	Erythrocyte	ECI2
5.37939e-135	1.03723	0.983	0.872	1.80414e-130	Erythrocyte	EEF1B2
5.40453e-135	0.51593	0.481	0.195	1.81257e-130	Erythrocyte	HAGH
5.81131e-135	0.523856	0.496	0.215	1.949e-130	Erythrocyte	ARL2
1.70572e-134	0.667973	0.428	0.162	5.72065e-130	Erythrocyte	SLC39A8
3.03932e-134	-0.653053	0.23	0.657	1.01933e-129	Erythrocyte	MT-ND4L
3.70827e-134	-0.714714	0.221	0.611	1.24368e-129	Erythrocyte	DUSP1
4.20397e-134	0.510774	0.52	0.24	1.40993e-129	Erythrocyte	MRPL27
4.37591e-134	0.575523	0.723	0.427	1.46759e-129	Erythrocyte	IDH2
5.57193e-134	1.15481	1	0.982	1.86871e-129	Erythrocyte	RPS3
4.00454e-133	0.812246	0.72	0.414	1.34304e-128	Erythrocyte	NASP
6.91037e-133	0.970237	0.581	0.936	2.3176e-128	Erythrocyte	MT-ND2
3.38114e-132	-0.744479	0.065	0.463	1.13397e-127	Erythrocyte	PLAC8
9.15055e-132	-0.932746	0.02	0.415	3.06891e-127	Erythrocyte	TYROBP
9.41882e-132	1.44688	0.374	0.124	3.15888e-127	Erythrocyte	NFIA
1.14446e-131	-0.752559	0.012	0.408	3.83828e-127	Erythrocyte	LST1
1.80329e-129	0.761999	0.855	0.641	6.04788e-125	Erythrocyte	HSPA8
3.99269e-129	-0.595063	0.018	0.416	1.33907e-124	Erythrocyte	TPM4
4.33411e-129	1.21379	0.998	0.981	1.45357e-124	Erythrocyte	RPS23
7.80139e-129	0.949804	0.993	0.952	2.61643e-124	Erythrocyte	RPL7
1.94252e-128	0.760504	0.999	0.983	6.51481e-124	Erythrocyte	RPLP2
5.66805e-128	-0.815508	0.069	0.454	1.90095e-123	Erythrocyte	S100A10
6.41663e-128	-0.555655	0.137	0.561	2.15201e-123	Erythrocyte	CCNL1
6.5889e-128	0.53216	0.627	0.35	2.20979e-123	Erythrocyte	STOML2
9.26459e-128	-0.667131	0.032	0.426	3.10716e-123	Erythrocyte	PRKCB
7.68818e-127	-0.682229	0.145	0.544	2.57846e-122	Erythrocyte	NFKBIA
1.40497e-126	-0.68358	0.028	0.418	4.712e-122	Erythrocyte	CTSS
5.69231e-126	0.548418	0.688	0.429	1.90909e-121	Erythrocyte	ESD
8.50958e-126	0.627913	0.659	0.398	2.85394e-121	Erythrocyte	NUDC
1.79827e-125	-0.712895	0.101	0.494	6.03102e-121	Erythrocyte	ANXA1
3.45365e-124	-0.666206	0.016	0.397	1.15828e-119	Erythrocyte	ITGB2
7.35718e-124	0.610968	0.992	0.943	2.46745e-119	Erythrocyte	RPL22
1.18226e-123	-0.530242	0.461	0.756	3.96506e-119	Erythrocyte	MYL12A
6.07649e-123	0.501432	0.527	0.252	2.03793e-118	Erythrocyte	DNPH1
1.26492e-122	0.874545	0.625	0.339	4.24228e-118	Erythrocyte	HNRNPAB
1.52277e-122	0.593549	0.729	0.492	5.10707e-118	Erythrocyte	SSBP1
2.00654e-122	0.521728	0.572	0.291	6.72952e-118	Erythrocyte	PSMB5
2.83181e-122	0.598167	0.746	0.512	9.49734e-118	Erythrocyte	TCEA1
3.78208e-122	-0.559296	0.078	0.474	1.26844e-117	Erythrocyte	STK4
9.17615e-122	-0.593037	0.163	0.542	3.0775e-117	Erythrocyte	DBI
3.07278e-121	-0.786443	0.017	0.392	1.03055e-116	Erythrocyte	S100A11
7.8926e-121	0.50418	0.653	0.384	2.64702e-116	Erythrocyte	NDUFC1
1.26818e-120	0.504929	0.474	0.202	4.25322e-116	Erythrocyte	DHFR
2.03978e-120	1.04011	0.935	0.756	6.84102e-116	Erythrocyte	HSP90AB1
3.40112e-120	0.589773	0.626	0.359	1.14067e-115	Erythrocyte	MRPS34
1.13918e-119	0.546929	0.788	0.584	3.8206e-115	Erythrocyte	PSMB1
1.31482e-119	0.550145	0.614	0.353	4.40966e-115	Erythrocyte	TXN2
1.88296e-119	0.900459	0.853	0.665	6.31506e-115	Erythrocyte	NCL
2.61588e-119	-0.600451	0.14	0.513	8.77312e-115	Erythrocyte	ARPC1B
3.04193e-119	-0.58876	0.021	0.395	1.0202e-114	Erythrocyte	PYCARD
4.91339e-119	-0.510492	0.405	0.73	1.64785e-114	Erythrocyte	SARAF
1.05254e-118	-0.562882	0.015	0.386	3.53001e-114	Erythrocyte	PSMB9
1.66403e-118	0.516112	0.385	0.144	5.58081e-114	Erythrocyte	RCL1
2.0778e-118	0.539483	0.733	0.484	6.96853e-114	Erythrocyte	CCT8
3.96802e-118	-0.801124	0.012	0.377	1.33079e-113	Erythrocyte	FCER1G
4.34067e-118	0.517948	0.461	0.191	1.45577e-113	Erythrocyte	MLLT3
5.22615e-118	0.57282	0.647	0.389	1.75275e-113	Erythrocyte	MRPL20
7.1589e-118	0.509079	0.621	0.357	2.40095e-113	Erythrocyte	NDUFB6
9.20013e-117	0.59897	0.258	0.07	3.08554e-112	Erythrocyte	SPTA1
1.18809e-116	0.75918	0.89	0.661	3.9846e-112	Erythrocyte	ANP32B
4.63069e-116	0.638282	0.988	0.989	1.55304e-111	Erythrocyte	TPT1
1.21636e-115	0.588081	0.658	0.404	4.07944e-111	Erythrocyte	CCT3
4.28443e-115	0.529737	0.496	0.233	1.43691e-110	Erythrocyte	MCM5
1.43368e-114	-0.591625	0.106	0.488	4.80829e-110	Erythrocyte	STK17B
4.31891e-114	0.567305	0.566	0.292	1.44848e-109	Erythrocyte	TUBA1C
4.46782e-114	0.517399	0.503	0.236	1.49842e-109	Erythrocyte	SRM
6.35139e-114	-0.538177	0.05	0.42	2.13013e-109	Erythrocyte	CMTM6
1.6615e-113	0.880664	0.99	0.944	5.57234e-109	Erythrocyte	RPL10A
2.29212e-113	-0.54797	0.036	0.401	7.6873e-109	Erythrocyte	IFI16
2.72637e-113	-0.517939	0.047	0.417	9.14371e-109	Erythrocyte	PSMB8
4.95802e-113	-0.593066	0.009	0.365	1.66282e-108	Erythrocyte	CD48
8.72566e-113	0.548033	0.615	0.316	2.92641e-108	Erythrocyte	AC084033.3
6.07814e-112	-0.55983	0.037	0.395	2.03849e-107	Erythrocyte	ICAM3
7.93147e-112	0.518894	0.983	0.939	2.66006e-107	Erythrocyte	RPL38
3.45801e-111	0.716241	0.998	0.972	1.15975e-106	Erythrocyte	RPS29
6.07723e-111	0.61194	0.625	0.362	2.03818e-106	Erythrocyte	CCT5
1.62846e-110	0.563177	0.512	0.257	5.46153e-106	Erythrocyte	DKC1
2.16818e-110	-0.601277	0.042	0.404	7.27165e-106	Erythrocyte	ANKRD44
3.55661e-110	0.508893	0.503	0.235	1.19281e-105	Erythrocyte	LYAR
4.23395e-110	-0.576236	0.185	0.529	1.41998e-105	Erythrocyte	RAC2
5.98614e-110	0.515379	0.502	0.24	2.00763e-105	Erythrocyte	VRK1
1.0279e-109	0.52927	0.593	0.339	3.44736e-105	Erythrocyte	PDAP1
1.15833e-109	-0.604747	0.012	0.361	3.88482e-105	Erythrocyte	RCSD1
1.67265e-109	-0.531997	0.08	0.446	5.60974e-105	Erythrocyte	GNAI2
1.88864e-109	-0.515744	0.055	0.414	6.33411e-105	Erythrocyte	RABAC1
1.31982e-108	1.18574	0.996	0.969	4.42642e-104	Erythrocyte	RPL3
7.31277e-108	0.592691	0.381	0.153	2.45256e-103	Erythrocyte	LPCAT3
8.34978e-108	0.5133	0.588	0.315	2.80035e-103	Erythrocyte	SLBP
1.59385e-107	-0.52562	0.019	0.365	5.34544e-103	Erythrocyte	2023-09-09
3.8418e-106	0.548303	0.778	0.569	1.28846e-101	Erythrocyte	ATP5F1A
5.08083e-106	-0.578667	0.011	0.351	1.70401e-101	Erythrocyte	LITAF
5.33045e-106	0.563271	0.791	0.557	1.78773e-101	Erythrocyte	YWHAE
7.36101e-106	0.545718	0.785	0.56	2.46874e-101	Erythrocyte	COX5A
8.11945e-106	0.58876	0.362	0.145	2.7231e-101	Erythrocyte	EIF1AY
5.73844e-105	0.849099	0.998	0.969	1.92456e-100	Erythrocyte	RPL9
6.508e-105	0.526369	0.673	0.433	2.18265e-100	Erythrocyte	ILF2
2.42326e-104	-0.680103	0.006	0.341	8.12715e-100	Erythrocyte	CD69
2.61712e-104	-0.519362	0.15	0.496	8.77728e-100	Erythrocyte	CAP1
8.00613e-104	1.01681	0.998	0.988	2.6851e-99	Erythrocyte	RPS27A
2.86941e-103	-0.576814	0.01	0.342	9.62343e-99	Erythrocyte	SELL
4.8206e-103	0.507933	0.262	0.079	1.61673e-98	Erythrocyte	TFR2
[truncated: 7,854 more rows]

## Sheet: Table 3 Age_cell_type
ct	p	cor_GSE185381	p_GSE185381	cor_GSE120221	p_GSE120221	cor_HCA	p_HCA
CD14+MHCIIhigh monocyte	0.587427	0.116707	0.748152	-0.232557	0.263277	-0.370611	0.366113
CD14+MHCIIlow monocyte	0.0361663	-0.235414	0.512636	-0.401798	0.0464868	-0.702602	0.0519639
CD16+ monocyte	0.0915458	0.510274	0.131826	0.107405	0.609342	0.0531548	0.900522
CD16+ NK	0.0333898	0.651199	0.0413953	0.261055	0.20751	0.237164	0.571711
CD56+ NK	0.45508	0.0547423	0.880609	0.209835	0.314066	0.410972	0.311796
cDC1	0.468704	0.316006	0.373729	-0.0276888	0.895474	0.422649	0.296849
cDC2	0.549371	0.381967	0.276052	-0.121912	0.561562	-0.537568	0.169408
cDC2 (cycling)	0.259871	-0.1614	0.655991	-0.0978783	0.641604	-0.73893	0.0362292
CDP	0.949283	0.1952	0.588901	-0.0320182	0.879239	-0.742627	0.0348177
CLP	0.0403498	-0.547582	0.101327	-0.245425	0.23701	-0.325895	0.430834
CMP	0.430238	-0.0100376	0.978045	-0.0913096	0.664228	-0.638142	0.0886342
Early SOX4+ erythroblast	0.473346	0.293462	0.410538	-0.0739871	0.725229	-0.622339	0.0994008
Effector/Memory CD4 T cell	0.000996691	0.284085	0.426334	0.543336	0.00500152	0.745084	0.0338986
Erythrocyte	0.325592	0.336478	0.34178	-0.103199	0.623504	0.0192756	0.963867
Fetal HBG+ erythrocyte	0.288907	0.334891	0.344204	0.0459143	0.827481	-0.468585	0.241542
Fibroblast	0.555673	0.328994	0.353293	NA	NA	-0.264893	0.52607
Gamma-delta T cell	0.935227	0.010063	0.977989	0.0277483	0.895251	-0.46236	0.248704
GMP	0.0373308	-0.324113	0.360905	-0.267704	0.195749	-0.589656	0.123938
GZMB+ CD8 T cell	0.0873163	0.527862	0.116824	0.219496	0.291783	0.251645	0.547706
GZMK CD8 T cell	0.344689	0.232937	0.51721	0.166868	0.425314	-0.144949	0.732003
HSC	0.745378	-0.204108	0.571655	0.231074	0.266421	-0.692392	0.0570121
ILC	0.239331	-0.139383	0.700955	-0.141833	0.498856	-0.428514	0.289475
INF-activated T cell	0.283596	0.315105	0.375168	0.190695	0.361202	0.0182805	0.965732
Intermediate EPCAM+ erythroblast	0.38983	0.562179	0.0907406	-0.0487329	0.817061	-0.536887	0.170054
Late hemoglobin+ erythroblast	0.772923	-0.0708166	0.845863	0.156835	0.454051	-0.591721	0.122297
Macrophage	0.202456	0.353513	0.316301	0.168304	0.421282	0.00874139	0.983611
MAIT	0.577205	-0.219933	0.541501	0.053328	0.800138	-0.391654	0.33729
Mast cell	0.4199	0.322869	0.362859	0.0555988	0.791806	-0.362396	0.377656
Megakaryocyte	0.239524	0.23463	0.514081	0.0665948	0.751791	0.50131	0.205652
Megakaryocyte progenitor	0.739137	0.565892	0.0881651	-0.22308	0.283777	-0.0591486	0.889355
Memory B cell	0.0870877	-0.637942	0.0471882	-0.113083	0.59044	-0.328497	0.426945
MEP	0.333202	-0.103819	0.775329	-0.121145	0.564044	-0.444701	0.269593
Mesenchymal stromal cell	0.850409	-0.0717114	0.843936	-0.0181216	0.931485	-0.037895	0.929015
Metamyelocyte/Band neutrophil	0.289232	0.246024	0.493231	NA	NA	0.377441	0.35664
MPP	0.342788	0.0247285	0.945939	-0.153519	0.463768	-0.677864	0.0646814
Myelocyte	0.0500644	-0.368633	0.29455	-0.242174	0.243476	-0.489829	0.217904
Naive B cell	0.279383	-0.678419	0.0310412	-0.0725403	0.730405	0.556084	0.152349
Naive CD4 T cell	0.394361	-0.439579	0.203675	-0.150932	0.471423	0.335265	0.416896
Naive CD8 T cell	1.23751e-07	-0.556042	0.0951009	-0.785588	3.27937e-06	-0.63618	0.0899318
Osteoclast	0.568703	NA	NA	0.107243	0.609885	0.0979525	0.817511
pDC	0.399478	0.140667	0.698307	-0.242932	0.241958	-0.386762	0.343894
Plasma cell	0.366419	0.122753	0.735488	0.14698	0.483242	0.281511	0.499391
pre-pDC (lymphoid origin)	0.4194	-0.0263015	0.942505	-0.118651	0.572152	-0.627765	0.0956236
pre-pDC (myeloid origin)	0.0782024	-0.122479	0.73606	-0.39193	0.0526658	-0.634652	0.0909504
preB cell	0.814542	-0.675036	0.0322199	0.148642	0.478254	0.619602	0.101338
preB cell (cycling)	0.893432	-0.269203	0.451971	-0.047508	0.821586	0.309142	0.456231
proB cell	0.969198	-0.283564	0.42722	0.0610539	0.771884	-0.0137899	0.974147
proB cell (cycling)	0.625979	-0.11259	0.756808	-0.0405613	0.847349	-0.188705	0.654488
Promyelocyte	0.381597	-0.070354	0.84686	-0.126973	0.5453	-0.364716	0.37438
S100A+ preNeutrophil	0.316838	0.0205545	0.955056	-0.183501	0.379931	-0.536104	0.170799
S100A+ preNeutrophil (cycling)	0.22231	-0.0798952	0.826341	-0.22412	0.281479	-0.586763	0.126259
T/NK cell (cycling)	0.16592	0.325609	0.358563	0.270197	0.191459	-0.362168	0.377978
Tissue-resident NK cell	0.0838562	0.208843	0.562566	0.405898	0.0440935	-0.0182022	0.965878
Treg	0.0469957	-0.0836656	0.818257	0.407742	0.0430494	0.779419	0.0225885

## Sheet: Table 4 Age_Gene
gene	cor	cell.type	p	q	geneAge_database	DNA_methylation_clock
GNB1	-0.384556	CD14+MHCIIhigh monocyte	0.00110458	1
SKI	-0.448305	CD14+MHCIIhigh monocyte	0.000111998	0.475656
RER1	0.347108	CD14+MHCIIhigh monocyte	0.00347728	1
KIF1B	-0.310555	CD14+MHCIIhigh monocyte	0.00940171	1
PEX14	-0.363557	CD14+MHCIIhigh monocyte	0.00213654	1
VPS13D	-0.468373	CD14+MHCIIhigh monocyte	4.93674e-05	0.210354
PRDM2	-0.392653	CD14+MHCIIhigh monocyte	0.000846441	1
SPEN	-0.375912	CD14+MHCIIhigh monocyte	0.00145693	1
FBXO42	-0.309147	CD14+MHCIIhigh monocyte	0.00974615	1
CROCC	-0.455524	CD14+MHCIIhigh monocyte	8.39006e-05	0.356578
EIF4G3	-0.335356	CD14+MHCIIhigh monocyte	0.0048497	1
CLIC4	-0.417948	CD14+MHCIIhigh monocyte	0.000352439	1
MACO1	-0.356758	CD14+MHCIIhigh monocyte	0.0026211	1
PHACTR4	-0.359792	CD14+MHCIIhigh monocyte	0.0023939	1
EPB41	-0.35217	CD14+MHCIIhigh monocyte	0.0030013	1
PUM1	-0.373371	CD14+MHCIIhigh monocyte	0.00157818	1
KPNA6	-0.465613	CD14+MHCIIhigh monocyte	5.54229e-05	0.235991
YARS	-0.344037	CD14+MHCIIhigh monocyte	0.00379764	1
AGO4	-0.396473	CD14+MHCIIhigh monocyte	0.000744794	1
NFYC	-0.339468	CD14+MHCIIhigh monocyte	0.00432292	1
HIVEP3	-0.331171	CD14+MHCIIhigh monocyte	0.00544335	1
FOXJ3	-0.308892	CD14+MHCIIhigh monocyte	0.00980994	1
RPS8	0.387645	CD14+MHCIIhigh monocyte	0.000998715	1
FAF1	-0.317847	CD14+MHCIIhigh monocyte	0.00778162	1
EPS15	-0.313936	CD14+MHCIIhigh monocyte	0.00861722	1
OSBPL9	-0.321448	CD14+MHCIIhigh monocyte	0.00707602	1
PDE4B	-0.336928	CD14+MHCIIhigh monocyte	0.004642	1
MIER1	-0.308435	CD14+MHCIIhigh monocyte	0.00992476	1
ST6GALNAC3	-0.495696	CD14+MHCIIhigh monocyte	1.48571e-05	0.0634994
FUBP1	-0.411679	CD14+MHCIIhigh monocyte	0.00044075	1
GTF2B	-0.372329	CD14+MHCIIhigh monocyte	0.00163048	1
RPL5	0.353706	CD14+MHCIIhigh monocyte	0.00286891	1
PTBP2	-0.344787	CD14+MHCIIhigh monocyte	0.00371713	1
DPYD-AS1	-0.359536	CD14+MHCIIhigh monocyte	0.00241236	1
TAF13	-0.34464	CD14+MHCIIhigh monocyte	0.00373271	1
AMPD2	-0.335923	CD14+MHCIIhigh monocyte	0.0047739	1
AHCYL1	-0.437449	CD14+MHCIIhigh monocyte	0.000170866	0.723446
SLC22A15	-0.314466	CD14+MHCIIhigh monocyte	0.00849958	1
NBPF19	-0.31145	CD14+MHCIIhigh monocyte	0.00918809	1
RPRD2	-0.349721	CD14+MHCIIhigh monocyte	0.00322377	1
POGZ	-0.326273	CD14+MHCIIhigh monocyte	0.00621877	1
S100A9	-0.410692	CD14+MHCIIhigh monocyte	0.000456361	1
S100A12	-0.431692	CD14+MHCIIhigh monocyte	0.000212552	0.898243
S100A8	-0.403765	CD14+MHCIIhigh monocyte	0.000580915	1
GATAD2B	-0.316421	CD14+MHCIIhigh monocyte	0.00807758	1
ASH1L	-0.34687	CD14+MHCIIhigh monocyte	0.00350118	1
UFC1	0.337988	CD14+MHCIIhigh monocyte	0.00450641	1
FCGR2A	0.378818	CD14+MHCIIhigh monocyte	0.00132856	1
SUCO	-0.460148	CD14+MHCIIhigh monocyte	6.94911e-05	0.295615
RC3H1	-0.356008	CD14+MHCIIhigh monocyte	0.0026801	1
ACBD6	-0.481714	CD14+MHCIIhigh monocyte	2.78188e-05	0.118703
XPR1	-0.33627	CD14+MHCIIhigh monocyte	0.00472797	1
SMG7	-0.407402	CD14+MHCIIhigh monocyte	0.000512112	1
ODR4	-0.385397	CD14+MHCIIhigh monocyte	0.0010748	1
PLA2G4A	-0.374011	CD14+MHCIIhigh monocyte	0.00154682	1
TROVE2	-0.347327	CD14+MHCIIhigh monocyte	0.00345534	1
DENND1B	-0.328795	CD14+MHCIIhigh monocyte	0.00580813	1
MIR181A1HG	-0.324372	CD14+MHCIIhigh monocyte	0.0065449	1
PPP1R12B	-0.333327	CD14+MHCIIhigh monocyte	0.00512989	1
RCOR3	-0.364215	CD14+MHCIIhigh monocyte	0.0020942	1
ACBD3	-0.423303	CD14+MHCIIhigh monocyte	0.000290151	1
ARF1	-0.374468	CD14+MHCIIhigh monocyte	0.00152477	1
DISC1	-0.431381	CD14+MHCIIhigh monocyte	0.000215047	0.908573
SDCCAG8	-0.371123	CD14+MHCIIhigh monocyte	0.00169297	1
NLRP3	-0.343982	CD14+MHCIIhigh monocyte	0.00380359	1
KIDINS220	-0.353907	CD14+MHCIIhigh monocyte	0.00285197	1
NOL10	-0.3158	CD14+MHCIIhigh monocyte	0.00820964	1
NBAS	-0.33658	CD14+MHCIIhigh monocyte	0.0046872	1
UBXN2A	-0.380737	CD14+MHCIIhigh monocyte	0.00124948	1
BIRC6	-0.345225	CD14+MHCIIhigh monocyte	0.0036707	1
STRN	-0.4	CD14+MHCIIhigh monocyte	0.000660904	1
DHX57	-0.352792	CD14+MHCIIhigh monocyte	0.00294707	1
PRKCE	-0.324829	CD14+MHCIIhigh monocyte	0.00646516	1
PSME4	-0.407475	CD14+MHCIIhigh monocyte	0.000510809	1
WDPCP	-0.592306	CD14+MHCIIhigh monocyte	8.27679e-08	0.000354743
AFTPH	-0.405008	CD14+MHCIIhigh monocyte	0.000556512	1
SERTAD2	-0.320899	CD14+MHCIIhigh monocyte	0.0071797	1
SPRED2	-0.401956	CD14+MHCIIhigh monocyte	0.000618187	1
GFPT1	-0.361893	CD14+MHCIIhigh monocyte	0.002247	1
TET3	-0.48367	CD14+MHCIIhigh monocyte	2.55241e-05	0.108962
HK2	-0.334735	CD14+MHCIIhigh monocyte	0.00493405	1
RMND5A	-0.352042	CD14+MHCIIhigh monocyte	0.00301257	1
MAP4K4	-0.424363	CD14+MHCIIhigh monocyte	0.000279086	1
CCDC93	-0.357434	CD14+MHCIIhigh monocyte	0.00256885	1
AC012447.1	-0.546998	CD14+MHCIIhigh monocyte	1.15575e-06	0.00495008
UBXN4	-0.31675	CD14+MHCIIhigh monocyte	0.00800842	1
KYNU	-0.34464	CD14+MHCIIhigh monocyte	0.00373271	1
GTDC1	-0.388906	CD14+MHCIIhigh monocyte	0.000958197	1
ACVR2A	-0.467166	CD14+MHCIIhigh monocyte	5.19346e-05	0.221189
EPC2	-0.30997	CD14+MHCIIhigh monocyte	0.00954354	1
GPD2	-0.383606	CD14+MHCIIhigh monocyte	0.00113914	1
2023-03-07	-0.390533	CD14+MHCIIhigh monocyte	0.000908134	1
CERS6	-0.319821	CD14+MHCIIhigh monocyte	0.00738752	1
MAP3K20	-0.378397	CD14+MHCIIhigh monocyte	0.00134648	1
OLA1	-0.486941	CD14+MHCIIhigh monocyte	2.20744e-05	0.0942577
NFE2L2	-0.438911	CD14+MHCIIhigh monocyte	0.00016155	0.685295	yes
SESTD1	-0.345792	CD14+MHCIIhigh monocyte	0.00361151	1
ZNF804A	-0.321027	CD14+MHCIIhigh monocyte	0.00715539	1
FAM117B	-0.374504	CD14+MHCIIhigh monocyte	0.00152302	1
CYP20A1	-0.365786	CD14+MHCIIhigh monocyte	0.00199609	1
CREB1	-0.433373	CD14+MHCIIhigh monocyte	0.000199503	0.843497	yes
CYP27A1	0.324865	CD14+MHCIIhigh monocyte	0.00645882	1
PID1	-0.342539	CD14+MHCIIhigh monocyte	0.00396332	1
CAB39	-0.324993	CD14+MHCIIhigh monocyte	0.00643666	1
DIS3L2	-0.367705	CD14+MHCIIhigh monocyte	0.0018819	1
ATG16L1	-0.343069	CD14+MHCIIhigh monocyte	0.003904	1
SUMF1	-0.378434	CD14+MHCIIhigh monocyte	0.00134491	1
ITPR1	-0.311066	CD14+MHCIIhigh monocyte	0.00927912	1
ATG7	-0.414018	CD14+MHCIIhigh monocyte	0.000405671	1
RFTN1	-0.338518	CD14+MHCIIhigh monocyte	0.00443994	1
UBE2E1	-0.37529	CD14+MHCIIhigh monocyte	0.00148578	1
RPL15	0.331957	CD14+MHCIIhigh monocyte	0.00532722	1
NGLY1	-0.356136	CD14+MHCIIhigh monocyte	0.00266994	1
SLC4A7	-0.346907	CD14+MHCIIhigh monocyte	0.00349749	1
TGFBR2	-0.370392	CD14+MHCIIhigh monocyte	0.00173189	1
LRRFIP2	-0.348369	CD14+MHCIIhigh monocyte	0.00335282	1
GOLGA4	-0.337823	CD14+MHCIIhigh monocyte	0.00452722	1
ULK4	-0.426665	CD14+MHCIIhigh monocyte	0.000256368	1
LIMD1	-0.352116	CD14+MHCIIhigh monocyte	0.00300612	1
SETD2	-0.33139	CD14+MHCIIhigh monocyte	0.00541072	1
SMARCC1	-0.33139	CD14+MHCIIhigh monocyte	0.00541072	1
QRICH1	-0.407786	CD14+MHCIIhigh monocyte	0.000505302	1
IP6K1	-0.385708	CD14+MHCIIhigh monocyte	0.00106399	1
DCAF1	-0.348881	CD14+MHCIIhigh monocyte	0.00330346	1
WDR82	-0.32863	CD14+MHCIIhigh monocyte	0.00583416	1
TKT	-0.313424	CD14+MHCIIhigh monocyte	0.00873215	1
DCP1A	-0.405282	CD14+MHCIIhigh monocyte	0.000551256	1
DENND6A	-0.430467	CD14+MHCIIhigh monocyte	0.000222542	0.939574
SLMAP	-0.468391	CD14+MHCIIhigh monocyte	4.93294e-05	0.210242
FRMD4B	-0.330348	CD14+MHCIIhigh monocyte	0.00556726	1
RYBP	-0.415846	CD14+MHCIIhigh monocyte	0.00038006	1
GBE1	-0.422352	CD14+MHCIIhigh monocyte	0.000300411	1
TBC1D23	-0.322416	CD14+MHCIIhigh monocyte	0.00689604	1		yes
TFG	-0.323275	CD14+MHCIIhigh monocyte	0.00673981	1
GSK3B	-0.320625	CD14+MHCIIhigh monocyte	0.00723205	1	yes
CD86	-0.421036	CD14+MHCIIhigh monocyte	0.000315166	1
CSTA	-0.314557	CD14+MHCIIhigh monocyte	0.00847944	1
DIRC2	-0.358202	CD14+MHCIIhigh monocyte	0.00251068	1
ZNF148	-0.345573	CD14+MHCIIhigh monocyte	0.00363432	1
ZXDC	-0.398428	CD14+MHCIIhigh monocyte	0.000697163	1
TMCC1	-0.347857	CD14+MHCIIhigh monocyte	0.00340284	1
ATP2C1	-0.327369	CD14+MHCIIhigh monocyte	0.00603719	1
MSL2	-0.33287	CD14+MHCIIhigh monocyte	0.00519494	1
SLC25A36	-0.434177	CD14+MHCIIhigh monocyte	0.000193525	0.818806
ATP1B3	-0.310061	CD14+MHCIIhigh monocyte	0.00952126	1
TFDP2	-0.383953	CD14+MHCIIhigh monocyte	0.0011264	1
C3orf58	-0.356666	CD14+MHCIIhigh monocyte	0.00262823	1
PLSCR1	-0.398245	CD14+MHCIIhigh monocyte	0.000701494	1
PPM1L	-0.311359	CD14+MHCIIhigh monocyte	0.00920969	1
PDCD10	0.410016	CD14+MHCIIhigh monocyte	0.000467347	1
MRPL47	0.323714	CD14+MHCIIhigh monocyte	0.00666125	1
VPS8	-0.356027	CD14+MHCIIhigh monocyte	0.00267865	1
SENP2	-0.315453	CD14+MHCIIhigh monocyte	0.00828426	1
BCL6	-0.328045	CD14+MHCIIhigh monocyte	0.00592756	1
IL1RAP	-0.447866	CD14+MHCIIhigh monocyte	0.000113958	0.483864
SENP5	-0.417911	CD14+MHCIIhigh monocyte	0.000352903	1
RPL35A	0.348606	CD14+MHCIIhigh monocyte	0.00332983	1
HTT	-0.364525	CD14+MHCIIhigh monocyte	0.00207447	1	yes
KIAA0232	-0.467861	CD14+MHCIIhigh monocyte	5.04418e-05	0.214882
FBXL5	-0.317244	CD14+MHCIIhigh monocyte	0.00790565	1
FAM200B	0.321649	CD14+MHCIIhigh monocyte	0.00703833	1
TAPT1	-0.378763	CD14+MHCIIhigh monocyte	0.00133089	1
KLHL5	-0.427104	CD14+MHCIIhigh monocyte	0.000252238	1
RBM47	-0.348332	CD14+MHCIIhigh monocyte	0.00335638	1
SLAIN2	-0.30933	CD14+MHCIIhigh monocyte	0.0097008	1
RUFY3	-0.315179	CD14+MHCIIhigh monocyte	0.00834359	1
ANKRD17	-0.333583	CD14+MHCIIhigh monocyte	0.00509378	1
AREG	0.321155	CD14+MHCIIhigh monocyte	0.00713115	1
USO1	-0.341698	CD14+MHCIIhigh monocyte	0.00405904	1
NUP54	-0.329654	CD14+MHCIIhigh monocyte	0.00567383	1
ANTXR2	-0.418971	CD14+MHCIIhigh monocyte	0.000339664	1
PLAC8	0.351896	CD14+MHCIIhigh monocyte	0.0030255	1
MRPS18C	0.333547	CD14+MHCIIhigh monocyte	0.00509893	1
WDFY3	-0.389985	CD14+MHCIIhigh monocyte	0.000924738	1
ARHGAP24	-0.458229	CD14+MHCIIhigh monocyte	7.51684e-05	0.319541
PPP3CA	-0.432258	CD14+MHCIIhigh monocyte	0.00020807	0.87951
NFKB1	-0.336635	CD14+MHCIIhigh monocyte	0.00468004	1	yes
SEC24B	-0.444284	CD14+MHCIIhigh monocyte	0.000131182	0.556866
SEC24D	-0.345353	CD14+MHCIIhigh monocyte	0.00365726	1
ELF2	-0.37869	CD14+MHCIIhigh monocyte	0.00133399	1
IL15	-0.36076	CD14+MHCIIhigh monocyte	0.00232517	1
OTUD4	-0.413488	CD14+MHCIIhigh monocyte	0.000413387	1
TRAPPC11	-0.371799	CD14+MHCIIhigh monocyte	0.00165768	1
ICE1	-0.387773	CD14+MHCIIhigh monocyte	0.000994535	1
ZNF131	-0.460916	CD14+MHCIIhigh monocyte	6.73333e-05	0.286571
NDUFS4	-0.309915	CD14+MHCIIhigh monocyte	0.00955694	1
ARL15	-0.394535	CD14+MHCIIhigh monocyte	0.000794873	1
SLC38A9	-0.332413	CD14+MHCIIhigh monocyte	0.00526071	1
PDE4D	-0.438509	CD14+MHCIIhigh monocyte	0.000164064	0.695796
ZSWIM6	-0.348479	CD14+MHCIIhigh monocyte	0.00334219	1
KIF2A	-0.330714	CD14+MHCIIhigh monocyte	0.00551188	1
POLK	-0.409102	CD14+MHCIIhigh monocyte	0.000482577	1
MSH3	-0.356593	CD14+MHCIIhigh monocyte	0.00263395	1
XRCC4	-0.334936	CD14+MHCIIhigh monocyte	0.00490662	1
VCAN	-0.562003	CD14+MHCIIhigh monocyte	5.0401e-07	0.00215968
COX7C	0.37752	CD14+MHCIIhigh monocyte	0.00138456	1
MEF2C	-0.391465	CD14+MHCIIhigh monocyte	0.000880526	1
LUCAT1	-0.372366	CD14+MHCIIhigh monocyte	0.00162861	1
FAM172A	-0.38717	CD14+MHCIIhigh monocyte	0.00101438	1
APC	-0.340784	CD14+MHCIIhigh monocyte	0.00416541	1
DMXL1	-0.331463	CD14+MHCIIhigh monocyte	0.00539988	1
PCBD2	-0.388248	CD14+MHCIIhigh monocyte	0.000979148	1
SIL1	-0.405556	CD14+MHCIIhigh monocyte	0.000546046	1
DIAPH1	-0.314393	CD14+MHCIIhigh monocyte	0.00851572	1
ARHGAP26	-0.33044	CD14+MHCIIhigh monocyte	0.00555337	1
ARHGAP26-AS1	-0.325505	CD14+MHCIIhigh monocyte	0.00634871	1
DCTN4	-0.318761	CD14+MHCIIhigh monocyte	0.00759693	1
CNOT8	-0.333017	CD14+MHCIIhigh monocyte	0.00517404	1
AC022217.3	-0.339633	CD14+MHCIIhigh monocyte	0.00430295	1
ERGIC1	-0.408389	CD14+MHCIIhigh monocyte	0.000494768	1
UIMC1	-0.339651	CD14+MHCIIhigh monocyte	0.00430073	1
DOK3	-0.333839	CD14+MHCIIhigh monocyte	0.0050579	1
GMDS	-0.433976	CD14+MHCIIhigh monocyte	0.000195004	0.824867
SERPINB1	-0.378288	CD14+MHCIIhigh monocyte	0.00135118	1
TMEM170B	-0.325432	CD14+MHCIIhigh monocyte	0.00636121	1
NOL7	0.345755	CD14+MHCIIhigh monocyte	0.0036153	1
AL138720.1	-0.429188	CD14+MHCIIhigh monocyte	0.000233439	0.984881
JARID2	-0.376624	CD14+MHCIIhigh monocyte	0.00142445	1
KIF13A	-0.39852	CD14+MHCIIhigh monocyte	0.000695006	1
TPMT	0.321064	CD14+MHCIIhigh monocyte	0.00714846	1
HLA-E	-0.308471	CD14+MHCIIhigh monocyte	0.00991553	1
KCTD20	-0.522069	CD14+MHCIIhigh monocyte	4.21099e-06	0.018023
LMBRD1	-0.377849	CD14+MHCIIhigh monocyte	0.00137017	1
PHIP	-0.327022	CD14+MHCIIhigh monocyte	0.00609418	1
SNX14	-0.3088	CD14+MHCIIhigh monocyte	0.00983281	1
ASCC3	-0.339249	CD14+MHCIIhigh monocyte	0.00434968	1
ATG5	-0.378251	CD14+MHCIIhigh monocyte	0.00135276	1
SEC63	-0.359572	CD14+MHCIIhigh monocyte	0.00240971	1
CDK19	-0.340272	CD14+MHCIIhigh monocyte	0.00422605	1
FYN	-0.369405	CD14+MHCIIhigh monocyte	0.0017857	1
CEP85L	-0.35334	CD14+MHCIIhigh monocyte	0.00289995	1
MCM9	-0.420378	CD14+MHCIIhigh monocyte	0.000322789	1
MAN1A1	-0.323988	CD14+MHCIIhigh monocyte	0.00661255	1
IFNGR1	-0.342758	CD14+MHCIIhigh monocyte	0.00393868	1
REPS1	-0.438381	CD14+MHCIIhigh monocyte	0.000164872	0.699056
HECA	-0.383442	CD14+MHCIIhigh monocyte	0.00114522	1
PLAGL1	-0.386055	CD14+MHCIIhigh monocyte	0.00105201	1
STX11	-0.308855	CD14+MHCIIhigh monocyte	0.00981908	1
STXBP5	-0.459106	CD14+MHCIIhigh monocyte	7.25219e-05	0.308436
SCAF8	-0.31697	CD14+MHCIIhigh monocyte	0.0079626	1
SNX9	-0.350398	CD14+MHCIIhigh monocyte	0.00316092	1		yes
TMEM181	-0.479101	CD14+MHCIIhigh monocyte	3.11856e-05	0.133038
QKI	-0.438235	CD14+MHCIIhigh monocyte	0.000165799	0.702822
FAM120B	-0.412355	CD14+MHCIIhigh monocyte	0.000430336	1
PSMB1	0.310226	CD14+MHCIIhigh monocyte	0.00948126	1
PHF14	-0.358256	CD14+MHCIIhigh monocyte	0.00250657	1
BZW2	-0.31368	CD14+MHCIIhigh monocyte	0.00867452	1
SNX13	-0.37116	CD14+MHCIIhigh monocyte	0.00169105	1
CCM2	0.414841	CD14+MHCIIhigh monocyte	0.000393957	1
TNS3	-0.329288	CD14+MHCIIhigh monocyte	0.00573064	1
LANCL2	-0.341095	CD14+MHCIIhigh monocyte	0.00412897	1
VOPP1	-0.353413	CD14+MHCIIhigh monocyte	0.00289372	1
AC027644.4	-0.434396	CD14+MHCIIhigh monocyte	0.000191924	0.812223
POM121	-0.344165	CD14+MHCIIhigh monocyte	0.00378378	1
BCL7B	0.360011	CD14+MHCIIhigh monocyte	0.00237818	1
HIP1	-0.399836	CD14+MHCIIhigh monocyte	0.000664617	1
PTPN12	-0.34009	CD14+MHCIIhigh monocyte	0.00424789	1
SLC25A13	-0.34634	CD14+MHCIIhigh monocyte	0.00355503	1
TRRAP	-0.357178	CD14+MHCIIhigh monocyte	0.00258851	1
POLR2J3.1	-0.333382	CD14+MHCIIhigh monocyte	0.00512214	1
HBP1	-0.377246	CD14+MHCIIhigh monocyte	0.00139667	1	yes
IMMP2L	-0.341314	CD14+MHCIIhigh monocyte	0.00410342	1
DOCK4	-0.343452	CD14+MHCIIhigh monocyte	0.00386155	1
ST7	-0.394316	CD14+MHCIIhigh monocyte	0.000800731	1
UBE2H	-0.418057	CD14+MHCIIhigh monocyte	0.000351049	1
AC016831.7	-0.332852	CD14+MHCIIhigh monocyte	0.00519756	1
MKLN1	-0.419062	CD14+MHCIIhigh monocyte	0.000338544	1
CHCHD3	-0.487618	CD14+MHCIIhigh monocyte	2.14177e-05	0.0914752
CNOT4	-0.338554	CD14+MHCIIhigh monocyte	0.00443539	1
TPK1	-0.3298	CD14+MHCIIhigh monocyte	0.00565125	1
PRKAG2	-0.323604	CD14+MHCIIhigh monocyte	0.00668081	1
ZFX	-0.344019	CD14+MHCIIhigh monocyte	0.00379962	1
GK	-0.392434	CD14+MHCIIhigh monocyte	0.000852642	1
KDM6A	-0.376588	CD14+MHCIIhigh monocyte	0.0014261	1
UXT	-0.360706	CD14+MHCIIhigh monocyte	0.00232901	1
TAF1	-0.32004	CD14+MHCIIhigh monocyte	0.00734483	1	yes
RPS4X	0.324463	CD14+MHCIIhigh monocyte	0.00652888	1
HDAC8	-0.334917	CD14+MHCIIhigh monocyte	0.00490911	1
FTX	-0.474568	CD14+MHCIIhigh monocyte	3.79356e-05	0.161795
ABCB7	-0.401864	CD14+MHCIIhigh monocyte	0.000620125	1
DIAPH2	-0.367358	CD14+MHCIIhigh monocyte	0.00190212	1
MORF4L2	-0.317226	CD14+MHCIIhigh monocyte	0.00790944	1
TMEM164	-0.326583	CD14+MHCIIhigh monocyte	0.00616684	1
STAG2	-0.311999	CD14+MHCIIhigh monocyte	0.00905941	1
TNKS	-0.408572	CD14+MHCIIhigh monocyte	0.000491616	1
XPO7	-0.367541	CD14+MHCIIhigh monocyte	0.00189145	1
ADAM28	-0.365677	CD14+MHCIIhigh monocyte	0.0020028	1
PPP2R2A	-0.355095	CD14+MHCIIhigh monocyte	0.00275366	1
PTK2B	-0.343087	CD14+MHCIIhigh monocyte	0.00390197	1	yes
EXTL3	-0.371123	CD14+MHCIIhigh monocyte	0.00169297	1
NRG1	-0.315818	CD14+MHCIIhigh monocyte	0.00820573	1	yes
RAB11FIP1	-0.373883	CD14+MHCIIhigh monocyte	0.00155305	1
ADAM9	-0.411076	CD14+MHCIIhigh monocyte	0.000450231	1
VDAC3	0.310427	CD14+MHCIIhigh monocyte	0.00943258	1
HGSNAT	-0.387535	CD14+MHCIIhigh monocyte	0.00100231	1
RB1CC1	-0.369259	CD14+MHCIIhigh monocyte	0.0017938	1
RPS20	0.359645	CD14+MHCIIhigh monocyte	0.00240443	1
SDCBP	-0.508362	CD14+MHCIIhigh monocyte	8.21586e-06	0.0351392
PDE7A	-0.399525	CD14+MHCIIhigh monocyte	0.000671681	1
SGK3	-0.385324	CD14+MHCIIhigh monocyte	0.00107736	1
ARFGEF1	-0.310354	CD14+MHCIIhigh monocyte	0.00945026	1
COX6C	0.352975	CD14+MHCIIhigh monocyte	0.00293129	1
RNF19A	-0.354747	CD14+MHCIIhigh monocyte	0.00278208	1
UBR5	-0.469469	CD14+MHCIIhigh monocyte	4.71361e-05	0.200988
KLF10	-0.314393	CD14+MHCIIhigh monocyte	0.00851572	1
SNTB1	-0.329014	CD14+MHCIIhigh monocyte	0.00577358	1
NDUFB9	0.406251	CD14+MHCIIhigh monocyte	0.000533045	1
NSMCE2	-0.327954	CD14+MHCIIhigh monocyte	0.00594227	1
TMEM71	-0.422663	CD14+MHCIIhigh monocyte	0.000297021	1
PTK2	-0.41972	CD14+MHCIIhigh monocyte	0.000330581	1	yes
RFX3	-0.331061	CD14+MHCIIhigh monocyte	0.00545973	1
RIC1	-0.359956	CD14+MHCIIhigh monocyte	0.0023821	1
UBAP1	-0.460824	CD14+MHCIIhigh monocyte	6.75869e-05	0.287582
ANXA1	-0.403802	CD14+MHCIIhigh monocyte	0.000580184	1
PCSK5	-0.34963	CD14+MHCIIhigh monocyte	0.00323235	1
AGTPBP1	-0.314448	CD14+MHCIIhigh monocyte	0.00850361	1
DAPK1	-0.370557	CD14+MHCIIhigh monocyte	0.00172306	1
SPIN1	-0.331957	CD14+MHCIIhigh monocyte	0.00532722	1
SEMA4D	-0.363995	CD14+MHCIIhigh monocyte	0.00210823	1
TGFBR1	-0.399031	CD14+MHCIIhigh monocyte	0.000683041	1
ERP44	-0.309568	CD14+MHCIIhigh monocyte	0.00964213	1
ABCA1	-0.308983	CD14+MHCIIhigh monocyte	0.00978712	1
SLC31A2	0.36692	CD14+MHCIIhigh monocyte	0.00192794	1
TNFSF8	-0.313863	CD14+MHCIIhigh monocyte	0.00863356	1
PSMD5	-0.3228	CD14+MHCIIhigh monocyte	0.00682585	1
RABGAP1	-0.409358	CD14+MHCIIhigh monocyte	0.000478268	1
PSMB7	0.31273	CD14+MHCIIhigh monocyte	0.00889027	1
FAM129B	-0.345408	CD14+MHCIIhigh monocyte	0.00365152	1
GPR107	-0.452582	CD14+MHCIIhigh monocyte	9.44572e-05	0.401349
FCN1	-0.351476	CD14+MHCIIhigh monocyte	0.00306295	1
EDF1	-0.335758	CD14+MHCIIhigh monocyte	0.0047958	1
RPLP2	0.561967	CD14+MHCIIhigh monocyte	5.05056e-07	0.00216366
RPL27A	0.40488	CD14+MHCIIhigh monocyte	0.00055898	1
DENND5A	-0.360907	CD14+MHCIIhigh monocyte	0.00231495	1
TMEM41B	-0.339139	CD14+MHCIIhigh monocyte	0.00436311	1
SBF2	-0.372457	CD14+MHCIIhigh monocyte	0.00162397	1
CD44	-0.32291	CD14+MHCIIhigh monocyte	0.00680591	1
LDLRAD3	-0.309093	CD14+MHCIIhigh monocyte	0.00975979	1
TTC17	-0.320059	CD14+MHCIIhigh monocyte	0.00734128	1
PHF21A	-0.426538	CD14+MHCIIhigh monocyte	0.000257584	1
AMBRA1	-0.372165	CD14+MHCIIhigh monocyte	0.00163887	1
OSBP	-0.433812	CD14+MHCIIhigh monocyte	0.000196222	0.829821
STX5	-0.363739	CD14+MHCIIhigh monocyte	0.0021247	1
RASGRP2	0.327296	CD14+MHCIIhigh monocyte	0.00604915	1
KMT5B	-0.340583	CD14+MHCIIhigh monocyte	0.00418914	1
PPP6R3	-0.317244	CD14+MHCIIhigh monocyte	0.00790565	1
PPFIA1	-0.309074	CD14+MHCIIhigh monocyte	0.00976434	1
AP002336.2	-0.399086	CD14+MHCIIhigh monocyte	0.00068177	1
ACER3	-0.358805	CD14+MHCIIhigh monocyte	0.0024658	1
AP003086.2	-0.335484	CD14+MHCIIhigh monocyte	0.00483249	1
PICALM	-0.318121	CD14+MHCIIhigh monocyte	0.00772581	1
PTS	-0.335484	CD14+MHCIIhigh monocyte	0.00483249	1
PAFAH1B2	-0.332377	CD14+MHCIIhigh monocyte	0.005266	1
KMT2A	-0.347839	CD14+MHCIIhigh monocyte	0.00340464	1
APLP2	-0.375455	CD14+MHCIIhigh monocyte	0.0014781	1
SFMBT2	-0.39194	CD14+MHCIIhigh monocyte	0.000866745	1
TAF3	-0.312273	CD14+MHCIIhigh monocyte	0.00899565	1
PIP4K2A	-0.426921	CD14+MHCIIhigh monocyte	0.000253951	1
ARHGAP21	-0.390478	CD14+MHCIIhigh monocyte	0.000909782	1
MPP7	-0.396893	CD14+MHCIIhigh monocyte	0.000734313	1
SVIL	-0.325541	CD14+MHCIIhigh monocyte	0.00634247	1
ZNF438	-0.367779	CD14+MHCIIhigh monocyte	0.00187767	1		yes
WDFY4	-0.412209	CD14+MHCIIhigh monocyte	0.000432568	1
TIMM23B	-0.368729	CD14+MHCIIhigh monocyte	0.00182343	1
SGMS1	-0.43807	CD14+MHCIIhigh monocyte	0.000166848	0.706935
IPMK	-0.320899	CD14+MHCIIhigh monocyte	0.0071797	1
CCDC6	-0.344476	CD14+MHCIIhigh monocyte	0.00375032	1
VSIR	-0.318066	CD14+MHCIIhigh monocyte	0.00773694	1
MICU1	-0.345152	CD14+MHCIIhigh monocyte	0.00367841	1
MCU	-0.513059	CD14+MHCIIhigh monocyte	6.55544e-06	0.0280442
KAT6B	-0.406598	CD14+MHCIIhigh monocyte	0.000526652	1
LRMDA	-0.437796	CD14+MHCIIhigh monocyte	0.00016861	0.714231
WAPL	-0.33446	CD14+MHCIIhigh monocyte	0.00497167	1
SHLD2	-0.394133	CD14+MHCIIhigh monocyte	0.000805642	1
BTAF1	-0.31792	CD14+MHCIIhigh monocyte	0.0077667	1
CPEB3	-0.388376	CD14+MHCIIhigh monocyte	0.000975042	1
ENTPD1-AS1	-0.420981	CD14+MHCIIhigh monocyte	0.000315795	1
DNMBP	-0.318706	CD14+MHCIIhigh monocyte	0.00760791	1
GBF1	-0.31357	CD14+MHCIIhigh monocyte	0.00869918	1
VTI1A	-0.37847	CD14+MHCIIhigh monocyte	0.00134334	1
PDZD8	-0.34199	CD14+MHCIIhigh monocyte	0.00402551	1
SLC2A3	-0.36363	CD14+MHCIIhigh monocyte	0.0021318	1
ETV6	-0.364982	CD14+MHCIIhigh monocyte	0.00204576	1
ETNK1	-0.34846	CD14+MHCIIhigh monocyte	0.00334396	1
ITPR2	-0.328265	CD14+MHCIIhigh monocyte	0.00589238	1
KIAA1551	0.31092	CD14+MHCIIhigh monocyte	0.009314	1
FGD4	-0.4017	CD14+MHCIIhigh monocyte	0.000623629	1
CPNE8	-0.435584	CD14+MHCIIhigh monocyte	0.00018346	0.776585
ARID2	-0.331829	CD14+MHCIIhigh monocyte	0.00534597	1
DIP2B	-0.349465	CD14+MHCIIhigh monocyte	0.00324784	1
BIN2	0.321429	CD14+MHCIIhigh monocyte	0.00707945	1
PFDN5	-0.309531	CD14+MHCIIhigh monocyte	0.00965114	1
MON2	-0.423138	CD14+MHCIIhigh monocyte	0.000291903	1
TBK1	-0.33828	CD14+MHCIIhigh monocyte	0.00446963	1
LYZ	-0.506278	CD14+MHCIIhigh monocyte	9.0716e-06	0.0387811
FRS2	-0.422279	CD14+MHCIIhigh monocyte	0.000301214	1
ATP2B1	-0.32375	CD14+MHCIIhigh monocyte	0.00665473	1
CRADD	-0.366846	CD14+MHCIIhigh monocyte	0.00193227	1		yes
CKAP4	-0.337896	CD14+MHCIIhigh monocyte	0.00451796	1
VPS29	0.346176	CD14+MHCIIhigh monocyte	0.00357189	1
SH2B3	-0.317061	CD14+MHCIIhigh monocyte	0.00794358	1
KDM2B	-0.34539	CD14+MHCIIhigh monocyte	0.00365343	1
GLT1D1	-0.309769	CD14+MHCIIhigh monocyte	0.00959273	1
ULK1	-0.319949	CD14+MHCIIhigh monocyte	0.00736259	1
PSPC1	-0.373956	CD14+MHCIIhigh monocyte	0.00154949	1
XPO4	-0.370739	CD14+MHCIIhigh monocyte	0.0017133	1
UBL3	-0.314868	CD14+MHCIIhigh monocyte	0.00841127	1
HMGB1	0.308636	CD14+MHCIIhigh monocyte	0.0098741	1	yes
USPL1	-0.430997	CD14+MHCIIhigh monocyte	0.000218166	0.921534
FRY	-0.386676	CD14+MHCIIhigh monocyte	0.00103088	1
PDS5B	-0.335009	CD14+MHCIIhigh monocyte	0.00489668	1
NAA16	-0.308727	CD14+MHCIIhigh monocyte	0.00985114	1
LRCH1	-0.364836	CD14+MHCIIhigh monocyte	0.00205491	1
COMMD6	0.401608	CD14+MHCIIhigh monocyte	0.000625584	1
UBAC2	-0.371324	CD14+MHCIIhigh monocyte	0.00168241	1
RBM23	-0.320881	CD14+MHCIIhigh monocyte	0.00718318	1
STRN3	-0.316275	CD14+MHCIIhigh monocyte	0.00810849	1
FBXO33	-0.333784	CD14+MHCIIhigh monocyte	0.00506557	1
RPS29	0.398044	CD14+MHCIIhigh monocyte	0.000706287	1
NEMF	-0.381047	CD14+MHCIIhigh monocyte	0.00123708	1
SOS2	-0.346742	CD14+MHCIIhigh monocyte	0.00351411	1
DDHD1	-0.308599	CD14+MHCIIhigh monocyte	0.00988329	1
RTN1	-0.339011	CD14+MHCIIhigh monocyte	0.00437883	1
PPP2R5E	-0.319766	CD14+MHCIIhigh monocyte	0.00739823	1
RAD51B	-0.314722	CD14+MHCIIhigh monocyte	0.00844329	1
SUSD6	-0.392306	CD14+MHCIIhigh monocyte	0.000856279	1
PCNX1	-0.338774	CD14+MHCIIhigh monocyte	0.00440816	1
SIPA1L1	-0.45885	CD14+MHCIIhigh monocyte	7.32848e-05	0.311607
NUMB	-0.341808	CD14+MHCIIhigh monocyte	0.00404644	1
AL691403.1	-0.439879	CD14+MHCIIhigh monocyte	0.000155638	0.660371
FOS	-0.397843	CD14+MHCIIhigh monocyte	0.000711109	1	yes
FOXN3	-0.416266	CD14+MHCIIhigh monocyte	0.000374383	1
RPS6KA5	-0.38017	CD14+MHCIIhigh monocyte	0.00127237	1
BTBD7	-0.331719	CD14+MHCIIhigh monocyte	0.00536209	1
CLMN	-0.385452	CD14+MHCIIhigh monocyte	0.00107289	1
TRAF3	-0.319254	CD14+MHCIIhigh monocyte	0.00749881	1
MARK3	-0.430906	CD14+MHCIIhigh monocyte	0.000218915	0.924479
SIVA1	0.35027	CD14+MHCIIhigh monocyte	0.00317273	1
GPR132	-0.317408	CD14+MHCIIhigh monocyte	0.00787166	1
UBE3A	-0.333382	CD14+MHCIIhigh monocyte	0.00512214	1
INO80	-0.333949	CD14+MHCIIhigh monocyte	0.00504259	1
UBR1	-0.370593	CD14+MHCIIhigh monocyte	0.00172111	1
ATP8B4	-0.393658	CD14+MHCIIhigh monocyte	0.000818539	1
DMXL2	-0.349977	CD14+MHCIIhigh monocyte	0.00319986	1
TCF12	-0.331957	CD14+MHCIIhigh monocyte	0.00532722	1
RPS27L	0.328502	CD14+MHCIIhigh monocyte	0.00585448	1
USP3	-0.384374	CD14+MHCIIhigh monocyte	0.00111115	1
USP3-AS1	-0.335191	CD14+MHCIIhigh monocyte	0.0048719	1
DENND4A	-0.31167	CD14+MHCIIhigh monocyte	0.00913643	1
MAP2K1	-0.508033	CD14+MHCIIhigh monocyte	8.34576e-06	0.0356865
ARIH1	-0.322307	CD14+MHCIIhigh monocyte	0.00691621	1
UBE2Q2	-0.321831	CD14+MHCIIhigh monocyte	0.00700422	1
SCAPER	-0.327662	CD14+MHCIIhigh monocyte	0.00598957	1
IREB2	-0.341442	CD14+MHCIIhigh monocyte	0.00408858	1
IDH2	0.308325	CD14+MHCIIhigh monocyte	0.00995249	1
LUC7L	-0.32534	CD14+MHCIIhigh monocyte	0.00637687	1
RPS2	0.390131	CD14+MHCIIhigh monocyte	0.000920284	1
MGRN1	-0.413269	CD14+MHCIIhigh monocyte	0.000416619	1
GLYR1	-0.309604	CD14+MHCIIhigh monocyte	0.00963313	1
TXNDC11	-0.395504	CD14+MHCIIhigh monocyte	0.000769464	1
SNX29	-0.325176	CD14+MHCIIhigh monocyte	0.00640513	1
NDE1	-0.329252	CD14+MHCIIhigh monocyte	0.00573635	1
ABCC1	-0.327844	CD14+MHCIIhigh monocyte	0.00595997	1
RPS15A	0.336032	CD14+MHCIIhigh monocyte	0.00475935	1
CDR2	-0.371324	CD14+MHCIIhigh monocyte	0.00168241	1
TNRC6A	-0.337768	CD14+MHCIIhigh monocyte	0.00453417	1
PPP4C	0.393969	CD14+MHCIIhigh monocyte	0.000810086	1
FTO	-0.332139	CD14+MHCIIhigh monocyte	0.00530053	1
CMIP	-0.48272	CD14+MHCIIhigh monocyte	2.66164e-05	0.113599
CRISPLD2	-0.460971	CD14+MHCIIhigh monocyte	6.71816e-05	0.285992
METTL16	-0.382546	CD14+MHCIIhigh monocyte	0.00117883	1
MINK1	-0.469341	CD14+MHCIIhigh monocyte	4.73915e-05	0.20203
PIK3R5	-0.364617	CD14+MHCIIhigh monocyte	0.0020687	1
MAP2K4	-0.3298	CD14+MHCIIhigh monocyte	0.00565125	1
NCOR1	-0.404551	CD14+MHCIIhigh monocyte	0.000565373	1	yes
FLII	0.325706	CD14+MHCIIhigh monocyte	0.00631445	1
FAM222B	-0.532249	CD14+MHCIIhigh monocyte	2.5147e-06	0.0107654
NF1	-0.429645	CD14+MHCIIhigh monocyte	0.000229493	0.968459
AP2B1	-0.332779	CD14+MHCIIhigh monocyte	0.00520803	1
AATF	-0.322526	CD14+MHCIIhigh monocyte	0.00687592	1
WIPF2	-0.342502	CD14+MHCIIhigh monocyte	0.00396744	1
LINC00854	-0.521448	CD14+MHCIIhigh monocyte	4.34327e-06	0.0185849
AC008105.3	-0.353943	CD14+MHCIIhigh monocyte	0.0028489	1
KANSL1	-0.43012	CD14+MHCIIhigh monocyte	0.000225453	0.951638
CDC27	-0.537878	CD14+MHCIIhigh monocyte	1.87722e-06	0.00803824
ZNF652	-0.347309	CD14+MHCIIhigh monocyte	0.00345717	1
TEX14	-0.407402	CD14+MHCIIhigh monocyte	0.000512112	1
SMURF2	-0.338481	CD14+MHCIIhigh monocyte	0.0044445	1
SLC39A11	-0.362698	CD14+MHCIIhigh monocyte	0.00219297	1
CD300LB	-0.35652	CD14+MHCIIhigh monocyte	0.00263968	1
RPTOR	-0.337056	CD14+MHCIIhigh monocyte	0.00462545	1
SLC16A3	-0.33669	CD14+MHCIIhigh monocyte	0.00467288	1
FOXK2	-0.325304	CD14+MHCIIhigh monocyte	0.00638314	1
LPIN2	-0.420945	CD14+MHCIIhigh monocyte	0.000316215	1
EPB41L3	-0.407091	CD14+MHCIIhigh monocyte	0.000517686	1
NAPG	-0.347108	CD14+MHCIIhigh monocyte	0.00347728	1
LDLRAD4	-0.33892	CD14+MHCIIhigh monocyte	0.00439009	1
MAPRE2	-0.404935	CD14+MHCIIhigh monocyte	0.000557921	1
GALNT1	-0.339633	CD14+MHCIIhigh monocyte	0.00430295	1
EPG5	-0.413141	CD14+MHCIIhigh monocyte	0.000418515	1
PSTPIP2	-0.372275	CD14+MHCIIhigh monocyte	0.00163327	1
C18orf25	-0.325414	CD14+MHCIIhigh monocyte	0.00636434	1
DYM	-0.34358	CD14+MHCIIhigh monocyte	0.00384748	1
TCF4	-0.488404	CD14+MHCIIhigh monocyte	2.06774e-05	0.088334
SEC11C	0.38812	CD14+MHCIIhigh monocyte	0.000983269	1
PHLPP1	-0.43818	CD14+MHCIIhigh monocyte	0.000166148	0.704135
FKBP1A	-0.316074	CD14+MHCIIhigh monocyte	0.00815115	1
SIRPB2	-0.316093	CD14+MHCIIhigh monocyte	0.00814726	1
C20orf194	-0.328447	CD14+MHCIIhigh monocyte	0.00586321	1
RNF24	-0.388139	CD14+MHCIIhigh monocyte	0.000982679	1
RASSF2	-0.340711	CD14+MHCIIhigh monocyte	0.00417402	1
SLC23A2	-0.319839	CD14+MHCIIhigh monocyte	0.00738395	1
PLCB1	-0.393384	CD14+MHCIIhigh monocyte	0.000826065	1
RIN2	-0.315782	CD14+MHCIIhigh monocyte	0.00821355	1
RALGAPA2	-0.367102	CD14+MHCIIhigh monocyte	0.00191714	1
CHMP4B	-0.410052	CD14+MHCIIhigh monocyte	0.000466747	1
PHF20	-0.312419	CD14+MHCIIhigh monocyte	0.00896181	1
RPRD1B	-0.325779	CD14+MHCIIhigh monocyte	0.00630203	1
RALGAPB	-0.311523	CD14+MHCIIhigh monocyte	0.00917084	1
STK4	-0.351951	CD14+MHCIIhigh monocyte	0.00302065	1
NCOA3	-0.32768	CD14+MHCIIhigh monocyte	0.0059866	1
B4GALT5	-0.309093	CD14+MHCIIhigh monocyte	0.00975979	1
RAB22A	-0.406708	CD14+MHCIIhigh monocyte	0.000524647	1
RGS19	0.355277	CD14+MHCIIhigh monocyte	0.0027388	1
AC005258.1	-0.39353	CD14+MHCIIhigh monocyte	0.000822044	1
GADD45B	0.32344	CD14+MHCIIhigh monocyte	0.00671026	1
GNA15	-0.402102	CD14+MHCIIhigh monocyte	0.000615096	1
MRPL54	0.321612	CD14+MHCIIhigh monocyte	0.00704517	1
ICAM3	0.325797	CD14+MHCIIhigh monocyte	0.00629893	1
JUNB	0.34305	CD14+MHCIIhigh monocyte	0.00390603	1
ADGRE2	-0.387426	CD14+MHCIIhigh monocyte	0.00100592	1
JUND	-0.347272	CD14+MHCIIhigh monocyte	0.00346082	1	yes
CRTC1	-0.489921	CD14+MHCIIhigh monocyte	1.93153e-05	0.0825344
TYROBP	-0.408791	CD14+MHCIIhigh monocyte	0.000487857	1
SAMD4B	-0.331134	CD14+MHCIIhigh monocyte	0.0054488	1
RPS16	0.359115	CD14+MHCIIhigh monocyte	0.00244296	1
RPS19	0.449036	CD14+MHCIIhigh monocyte	0.000108801	0.462189
ERCC1	-0.385616	CD14+MHCIIhigh monocyte	0.00106716	1	yes
FTL	-0.347821	CD14+MHCIIhigh monocyte	0.00340644	1
RPL13A	0.33956	CD14+MHCIIhigh monocyte	0.00431181	1
LAIR1	0.344969	CD14+MHCIIhigh monocyte	0.00369772	1
FCAR	-0.335137	CD14+MHCIIhigh monocyte	0.00487932	1
ZNF524	0.439971	CD14+MHCIIhigh monocyte	0.00015509	0.658204
BCL2L13	-0.320278	CD14+MHCIIhigh monocyte	0.00729883	1
BID	-0.322252	CD14+MHCIIhigh monocyte	0.00692632	1
PI4KA	-0.418222	CD14+MHCIIhigh monocyte	0.000348975	1
PITPNB	-0.396034	CD14+MHCIIhigh monocyte	0.000755875	1
MTMR3	-0.371123	CD14+MHCIIhigh monocyte	0.00169297	1
LGALS2	-0.437741	CD14+MHCIIhigh monocyte	0.000168964	0.715563
MKL1	-0.357836	CD14+MHCIIhigh monocyte	0.00253823	1
SNU13	0.333199	CD14+MHCIIhigh monocyte	0.00514803	1
TSPO	-0.326163	CD14+MHCIIhigh monocyte	0.00623719	1
APP	-0.362771	CD14+MHCIIhigh monocyte	0.00218812	1	yes
SOD1	0.324134	CD14+MHCIIhigh monocyte	0.00658671	1	yes
SYNJ1	-0.355058	CD14+MHCIIhigh monocyte	0.00275664	1
RUNX1	-0.398684	CD14+MHCIIhigh monocyte	0.00069114	1
ZBTB21	-0.337915	CD14+MHCIIhigh monocyte	0.00451565	1
MT-CO1	-0.325395	CD14+MHCIIhigh monocyte	0.00636747	1	yes
MT-CO2	-0.407055	CD14+MHCIIhigh monocyte	0.000518345	1
MT-ATP6	-0.337641	CD14+MHCIIhigh monocyte	0.00455044	1
MT-CO3	-0.318341	CD14+MHCIIhigh monocyte	0.00768141	1
RERE	-0.382345	CD14+MHCIIlow monocyte	0.00153417	1
ENO1	-0.363382	CD14+MHCIIlow monocyte	0.00270897	1
HNRNPR	-0.436852	CD14+MHCIIlow monocyte	0.000245146	0.844038
RPL11	0.426849	CD14+MHCIIlow monocyte	0.000351417	1
MACO1	-0.315182	CD14+MHCIIlow monocyte	0.00994641	1
SMAP2	0.344524	CD14+MHCIIlow monocyte	0.00461526	1
NEGR1	-0.40467	CD14+MHCIIlow monocyte	0.000751311	1
FUBP1	-0.370838	CD14+MHCIIlow monocyte	0.00217502	1
ZNF326	-0.368791	CD14+MHCIIlow monocyte	0.00231131	1
RPL5	0.322115	CD14+MHCIIlow monocyte	0.00835001	1
FAM102B	-0.381906	CD14+MHCIIlow monocyte	0.00155507	1
STXBP3	-0.341621	CD14+MHCIIlow monocyte	0.00499577	1
APH1A	0.369271	CD14+MHCIIlow monocyte	0.00227865	1
PSMD4	0.453893	CD14+MHCIIlow monocyte	0.000129307	0.445979
S100A9	-0.366473	CD14+MHCIIlow monocyte	0.00247485	1
S100A8	-0.412982	CD14+MHCIIlow monocyte	0.000568579	1
S100A6	-0.373072	CD14+MHCIIlow monocyte	0.00203447	1
SSR2	0.339553	CD14+MHCIIlow monocyte	0.00528341	1
IFI16	0.344315	CD14+MHCIIlow monocyte	0.00464175	1
TAGLN2	-0.356657	CD14+MHCIIlow monocyte	0.00328778	1
IVNS1ABP	-0.359456	CD14+MHCIIlow monocyte	0.00303474	1
NEK7	-0.353274	CD14+MHCIIlow monocyte	0.00361862	1
RAB3GAP2	-0.324788	CD14+MHCIIlow monocyte	0.00779714	1
CEP170	-0.338029	CD14+MHCIIlow monocyte	0.00550476	1
ACP1	0.331743	CD14+MHCIIlow monocyte	0.00650613	1
ITGB1BP1	0.316268	CD14+MHCIIlow monocyte	0.00968008	1
PDIA6	0.349515	CD14+MHCIIlow monocyte	0.00402059	1
BIRC6	-0.431944	CD14+MHCIIlow monocyte	0.000292926	1
PRKD3	-0.338321	CD14+MHCIIlow monocyte	0.00546169	1
PRKCE	-0.413441	CD14+MHCIIlow monocyte	0.00055977	1
TET3	-0.472898	CD14+MHCIIlow monocyte	6.08227e-05	0.210142
KCMF1	-0.489083	CD14+MHCIIlow monocyte	3.08656e-05	0.106702
VAMP5	0.326459	CD14+MHCIIlow monocyte	0.00746809	1
ARID5A	0.415947	CD14+MHCIIlow monocyte	0.000513867	1
TMEM131	-0.376142	CD14+MHCIIlow monocyte	0.00185464	1
RPL31	0.406904	CD14+MHCIIlow monocyte	0.000697569	1		yes
DDX18	0.412564	CD14+MHCIIlow monocyte	0.000576696	1
AC012447.1	-0.471666	CD14+MHCIIlow monocyte	6.39575e-05	0.220909
WDR33	0.331221	CD14+MHCIIlow monocyte	0.00659608	1
DARS	-0.33876	CD14+MHCIIlow monocyte	0.00539763	1
RIF1	-0.372571	CD14+MHCIIlow monocyte	0.00206526	1
NFE2L2	-0.350747	CD14+MHCIIlow monocyte	0.00388468	1	yes
SSFA2	-0.396337	CD14+MHCIIlow monocyte	0.000986431	1
KLF7	-0.359414	CD14+MHCIIlow monocyte	0.00303838	1
RPL37A	0.431756	CD14+MHCIIlow monocyte	0.000294915	1
CAB39	-0.333038	CD14+MHCIIlow monocyte	0.00628769	1
SUMF1	-0.404294	CD14+MHCIIlow monocyte	0.000760712	1
RPL15	0.33665	CD14+MHCIIlow monocyte	0.00571188	1
NR1D2	-0.350517	CD14+MHCIIlow monocyte	0.0039097	1
UBP1	-0.329842	CD14+MHCIIlow monocyte	0.00683881	1
ACAA1	0.33003	CD14+MHCIIlow monocyte	0.00680525	1
TWF2	0.334311	CD14+MHCIIlow monocyte	0.00607909	1
PSMD6	0.322449	CD14+MHCIIlow monocyte	0.00827908	1
SEC61A1	0.32176	CD14+MHCIIlow monocyte	0.00842596	1
SLC25A36	-0.345986	CD14+MHCIIlow monocyte	0.00443352	1
RNF7	0.329529	CD14+MHCIIlow monocyte	0.00689505	1
PPM1L	-0.419602	CD14+MHCIIlow monocyte	0.000453047	1
LPP	-0.393037	CD14+MHCIIlow monocyte	0.00109661	1
IL1RAP	-0.343876	CD14+MHCIIlow monocyte	0.00469783	1
RPL35A	0.417033	CD14+MHCIIlow monocyte	0.000495062	1
STX18	-0.365909	CD14+MHCIIlow monocyte	0.00251617	1
LAP3	0.375871	CD14+MHCIIlow monocyte	0.00186995	1
AREG	0.351019	CD14+MHCIIlow monocyte	0.00385528	1
LRBA	-0.321865	CD14+MHCIIlow monocyte	0.00840356	1
FBXW7	-0.325749	CD14+MHCIIlow monocyte	0.00760642	1
DAP	0.462017	CD14+MHCIIlow monocyte	9.41788e-05	0.325011
TRIO	-0.389257	CD14+MHCIIlow monocyte	0.0012364	1
ZFR	-0.315954	CD14+MHCIIlow monocyte	0.00975626	1
ARL15	-0.326605	CD14+MHCIIlow monocyte	0.00743989	1
VCAN	-0.388088	CD14+MHCIIlow monocyte	0.00128279	1
MEF2C	-0.392766	CD14+MHCIIlow monocyte	0.00110615	1
ARRDC3	-0.333664	CD14+MHCIIlow monocyte	0.00618432	1
PPIP5K2	-0.337465	CD14+MHCIIlow monocyte	0.00558868	1
APC	-0.324705	CD14+MHCIIlow monocyte	0.00781392	1
KDM3B	-0.344294	CD14+MHCIIlow monocyte	0.00464441	1
AC022217.3	-0.388861	CD14+MHCIIlow monocyte	0.00125196	1
HK3	0.322094	CD14+MHCIIlow monocyte	0.00835446	1
UIMC1	-0.345756	CD14+MHCIIlow monocyte	0.00446165	1
NHP2	0.371527	CD14+MHCIIlow monocyte	0.00213077	1
JARID2	-0.353253	CD14+MHCIIlow monocyte	0.00362075	1
MYLIP	-0.418307	CD14+MHCIIlow monocyte	0.000473801	1
NUP153	-0.341704	CD14+MHCIIlow monocyte	0.00498444	1
TRIM38	-0.462915	CD14+MHCIIlow monocyte	9.08912e-05	0.313847
PSMB9	0.333622	CD14+MHCIIlow monocyte	0.00619117	1
BTBD9	-0.328798	CD14+MHCIIlow monocyte	0.00702787	1
MRPL14	0.450051	CD14+MHCIIlow monocyte	0.000149812	0.516251
SENP6	-0.319672	CD14+MHCIIlow monocyte	0.00888501	1
CRYBG1	0.415822	CD14+MHCIIlow monocyte	0.000516079	1
TNFAIP3	0.345067	CD14+MHCIIlow monocyte	0.004547	1
PHACTR2	-0.350643	CD14+MHCIIlow monocyte	0.00389604	1
SCAF8	-0.328234	CD14+MHCIIlow monocyte	0.00713186	1
COX19	0.321322	CD14+MHCIIlow monocyte	0.0085206	1
JAZF1	-0.331701	CD14+MHCIIlow monocyte	0.00651328	1
EIF4H	0.404398	CD14+MHCIIlow monocyte	0.00075809	1
PTPN12	-0.324371	CD14+MHCIIlow monocyte	0.00788136	1
COPS6	0.443598	CD14+MHCIIlow monocyte	0.000191075	0.658255
TFEC	0.319567	CD14+MHCIIlow monocyte	0.00890853	1
SND1	-0.378586	CD14+MHCIIlow monocyte	0.00172185	1
ATP6V1F	0.347113	CD14+MHCIIlow monocyte	0.00429768	1
GSTK1	0.343292	CD14+MHCIIlow monocyte	0.00477352	1
ZNF467	0.344733	CD14+MHCIIlow monocyte	0.0045889	1
RP2	-0.355718	CD14+MHCIIlow monocyte	0.00337686	1
RPS4X	0.330114	CD14+MHCIIlow monocyte	0.00679038	1
G6PD	0.348032	CD14+MHCIIlow monocyte	0.00418973	1
FUNDC2	0.38435	CD14+MHCIIlow monocyte	0.00144178	1
ATP6V1B2	0.328715	CD14+MHCIIlow monocyte	0.00704319	1
KIF13B	-0.317103	CD14+MHCIIlow monocyte	0.00947944	1
ARFGEF1	-0.319672	CD14+MHCIIlow monocyte	0.00888501	1
RIPK2	-0.317959	CD14+MHCIIlow monocyte	0.00927756	1
UBR5	-0.330135	CD14+MHCIIlow monocyte	0.00678667	1
EFR3A	-0.351833	CD14+MHCIIlow monocyte	0.00376828	1
DENND3	0.33168	CD14+MHCIIlow monocyte	0.00651686	1
MAF1	0.353587	CD14+MHCIIlow monocyte	0.00358679	1
RPS6	0.400514	CD14+MHCIIlow monocyte	0.000861344	1
BAG1	0.331868	CD14+MHCIIlow monocyte	0.0064847	1
UBAP1	-0.369689	CD14+MHCIIlow monocyte	0.00225059	1
ANXA1	-0.345944	CD14+MHCIIlow monocyte	0.00443862	1
PCSK5	-0.335439	CD14+MHCIIlow monocyte	0.00589953	1
NFIL3	-0.376977	CD14+MHCIIlow monocyte	0.00180824	1
TGFBR1	-0.328422	CD14+MHCIIlow monocyte	0.00709705	1
FBXW5	0.416929	CD14+MHCIIlow monocyte	0.000496842	1
RPLP2	0.381405	CD14+MHCIIlow monocyte	0.00157928	1
EIF3F	0.355571	CD14+MHCIIlow monocyte	0.00339091	1
RPL27A	0.320152	CD14+MHCIIlow monocyte	0.00877754	1
DENND5A	-0.315725	CD14+MHCIIlow monocyte	0.00981246	1
AMBRA1	-0.357409	CD14+MHCIIlow monocyte	0.00321802	1
DNAJC4	0.350705	CD14+MHCIIlow monocyte	0.00388922	1
SF3B2	0.323661	CD14+MHCIIlow monocyte	0.00802635	1
FOLR3	0.416093	CD14+MHCIIlow monocyte	0.000511299	1
FCHSD2	-0.374367	CD14+MHCIIlow monocyte	0.0019568	1
UVRAG	-0.373615	CD14+MHCIIlow monocyte	0.00200157	1
AP003086.2	-0.385874	CD14+MHCIIlow monocyte	0.00137492	1
YME1L1	0.365241	CD14+MHCIIlow monocyte	0.00256593	1
MAPK8	-0.333225	CD14+MHCIIlow monocyte	0.00625652	1	yes
CCDC6	-0.362526	CD14+MHCIIlow monocyte	0.00277723	1
ZMIZ1	-0.365867	CD14+MHCIIlow monocyte	0.00251925	1
ERC1	-0.322491	CD14+MHCIIlow monocyte	0.00827025	1
HEBP1	0.371214	CD14+MHCIIlow monocyte	0.00215078	1
FGD4	-0.373093	CD14+MHCIIlow monocyte	0.00203319	1
ARID2	-0.315829	CD14+MHCIIlow monocyte	0.00978688	1
COX14	0.368123	CD14+MHCIIlow monocyte	0.00235743	1
DIP2B	-0.357221	CD14+MHCIIlow monocyte	0.00323533	1
BIN2	0.347615	CD14+MHCIIlow monocyte	0.00423849	1
TMBIM4	0.363382	CD14+MHCIIlow monocyte	0.00270897	1
LYZ	-0.402247	CD14+MHCIIlow monocyte	0.000813791	1
ISCU	0.419873	CD14+MHCIIlow monocyte	0.000448802	1
HECTD4	-0.324663	CD14+MHCIIlow monocyte	0.00782232	1
PEBP1	0.392724	CD14+MHCIIlow monocyte	0.00110763	1
SPPL3	-0.354005	CD14+MHCIIlow monocyte	0.00354474	1
RAN	0.454165	CD14+MHCIIlow monocyte	0.000127961	0.441464
XPO4	-0.333789	CD14+MHCIIlow monocyte	0.00616383	1
GTF3A	0.330615	CD14+MHCIIlow monocyte	0.00670178	1
ELF1	-0.349682	CD14+MHCIIlow monocyte	0.00400192	1
KPNA3	-0.371736	CD14+MHCIIlow monocyte	0.00211752	1
WDFY2	-0.323368	CD14+MHCIIlow monocyte	0.00808673	1
STK24	-0.320528	CD14+MHCIIlow monocyte	0.00869423	1
NEMF	-0.405589	CD14+MHCIIlow monocyte	0.000728773	1
FBXO34	-0.343772	CD14+MHCIIlow monocyte	0.00471127	1
PPM1A	-0.327294	CD14+MHCIIlow monocyte	0.00730818	1
HIF1A	-0.415383	CD14+MHCIIlow monocyte	0.000523886	1	yes
ZBTB1	-0.350517	CD14+MHCIIlow monocyte	0.0039097	1
RBM25	-0.344921	CD14+MHCIIlow monocyte	0.00456529	1
NUMB	-0.328109	CD14+MHCIIlow monocyte	0.00715515	1
AL691403.1	-0.386354	CD14+MHCIIlow monocyte	0.00135444	1
FOS	-0.3898	CD14+MHCIIlow monocyte	0.00121538	1	yes
INO80	-0.374012	CD14+MHCIIlow monocyte	0.00197783	1
EID1	0.352794	CD14+MHCIIlow monocyte	0.00366791	1
MYO5A	-0.380444	CD14+MHCIIlow monocyte	0.00162662	1
SCAMP2	0.452264	CD14+MHCIIlow monocyte	0.000137661	0.474656
PDE8A	-0.318419	CD14+MHCIIlow monocyte	0.00917079	1
UBE2I	0.413504	CD14+MHCIIlow monocyte	0.000558578	1	yes
RNPS1	0.486264	CD14+MHCIIlow monocyte	3.48227e-05	0.120347
ELOB	-0.393768	CD14+MHCIIlow monocyte	0.00107129	1
CREBBP	-0.360229	CD14+MHCIIlow monocyte	0.002968	1	yes
CARHSP1	0.451742	CD14+MHCIIlow monocyte	0.000140442	0.484105
ARHGAP17	-0.374638	CD14+MHCIIlow monocyte	0.00194086	1
MAZ	0.360813	CD14+MHCIIlow monocyte	0.00291836	1
MVP	0.360333	CD14+MHCIIlow monocyte	0.00295908	1
KAT8	0.330302	CD14+MHCIIlow monocyte	0.00675704	1
SIAH1	-0.373887	CD14+MHCIIlow monocyte	0.0019853	1
MT2A	0.381175	CD14+MHCIIlow monocyte	0.00159048	1
MT1X	0.34419	CD14+MHCIIlow monocyte	0.00465771	1
NFATC3	-0.351123	CD14+MHCIIlow monocyte	0.00384403	1
PSMB6	0.327712	CD14+MHCIIlow monocyte	0.00722935	1
ASGR1	0.336483	CD14+MHCIIlow monocyte	0.00573745	1
PIK3R5	-0.322825	CD14+MHCIIlow monocyte	0.00819992	1
MAP2K4	-0.402665	CD14+MHCIIlow monocyte	0.000802694	1
ZSWIM7	0.324997	CD14+MHCIIlow monocyte	0.00775533	1
RPL23A	0.360834	CD14+MHCIIlow monocyte	0.0029166	1
NF1	-0.330886	CD14+MHCIIlow monocyte	0.00665421	1
LINC00854	-0.364134	CD14+MHCIIlow monocyte	0.00265027	1
ZNF652	-0.319212	CD14+MHCIIlow monocyte	0.00898888	1
TEX14	-0.425408	CD14+MHCIIlow monocyte	0.000369791	1
SLC39A11	-0.382178	CD14+MHCIIlow monocyte	0.0015421	1
TMEM104	-0.376142	CD14+MHCIIlow monocyte	0.00185464	1
FOXK2	-0.337298	CD14+MHCIIlow monocyte	0.00561376	1
EPB41L3	-0.343667	CD14+MHCIIlow monocyte	0.00472474	1
RAB31	-0.342853	CD14+MHCIIlow monocyte	0.004831	1
GALNT1	-0.399177	CD14+MHCIIlow monocyte	0.000899714	1
PHLPP1	-0.418203	CD14+MHCIIlow monocyte	0.000475512	1
ZNF516	-0.340953	CD14+MHCIIlow monocyte	0.00508719	1
RBCK1	0.40563	CD14+MHCIIlow monocyte	0.000727763	1
RASSF2	-0.407698	CD14+MHCIIlow monocyte	0.000679339	1
TMEM230	0.363111	CD14+MHCIIlow monocyte	0.00273045	1
TRMT6	0.336692	CD14+MHCIIlow monocyte	0.0057055	1
RGS19	0.331346	CD14+MHCIIlow monocyte	0.00657439	1
ARHGAP45	0.50224	CD14+MHCIIlow monocyte	1.73303e-05	0.0599455
POLR2E	0.36121	CD14+MHCIIlow monocyte	0.0028851	1
SAFB	-0.338279	CD14+MHCIIlow monocyte	0.00546782	1
RPS28	0.368624	CD14+MHCIIlow monocyte	0.00232276	1
PRDX2	0.324183	CD14+MHCIIlow monocyte	0.00791951	1
FAM32A	0.440026	CD14+MHCIIlow monocyte	0.000218162	0.751349
JUND	-0.462498	CD14+MHCIIlow monocyte	9.24069e-05	0.318989	yes
ECH1	0.329863	CD14+MHCIIlow monocyte	0.00683507	1
RPL13A	0.491464	CD14+MHCIIlow monocyte	2.78532e-05	0.0963165
RPS11	0.355885	CD14+MHCIIlow monocyte	0.00336087	1
NR1H2	0.372153	CD14+MHCIIlow monocyte	0.00209125	1
LILRA2	0.320319	CD14+MHCIIlow monocyte	0.00874043	1
RPL28	0.333789	CD14+MHCIIlow monocyte	0.00616383	1
TXN2	0.317228	CD14+MHCIIlow monocyte	0.00944966	1
LGALS1	-0.392265	CD14+MHCIIlow monocyte	0.00112397	1		yes
ATF4	0.347761	CD14+MHCIIlow monocyte	0.00422137	1
PACSIN2	-0.330343	CD14+MHCIIlow monocyte	0.00674965	1
TSPO	-0.33287	CD14+MHCIIlow monocyte	0.00631551	1
IFNAR1	0.362568	CD14+MHCIIlow monocyte	0.00277386	1
PRMT2	0.378669	CD14+MHCIIlow monocyte	0.00171746	1
MT-CO1	-0.32105	CD14+MHCIIlow monocyte	0.00857966	1	yes
MT-CO2	-0.345672	CD14+MHCIIlow monocyte	0.00447192	1
MT-ND4	-0.390134	CD14+MHCIIlow monocyte	0.0012026	1
UBE4B	-0.39868	CD16+ monocyte	0.000914375	1
KIF1B	-0.38122	CD16+ monocyte	0.00158829	1
AGTRAP	0.398597	CD16+ monocyte	0.00091686	1
MIIP	0.449891	CD16+ monocyte	0.000150725	0.748352
TNFRSF1B	-0.375644	CD16+ monocyte	0.00188284	1
PRDM2	-0.352524	CD16+ monocyte	0.00369591	1
CROCC	-0.324307	CD16+ monocyte	0.00789417	1
SYF2	0.389365	CD16+ monocyte	0.00123219	1
MACO1	-0.395025	CD16+ monocyte	0.00102898	1
PHACTR4	-0.378693	CD16+ monocyte	0.00171622	1
TAF12	0.378755	CD16+ monocyte	0.00171294	1
ZCCHC17	-0.325456	CD16+ monocyte	0.00766413	1
KPNA6	-0.34087	CD16+ monocyte	0.00509866	1
YARS	-0.348848	CD16+ monocyte	0.00409595	1
AGO3	-0.34726	CD16+ monocyte	0.00428023	1
TRAPPC3	0.36117	CD16+ monocyte	0.00288844	1
HIVEP3	-0.335648	CD16+ monocyte	0.00586677	1
MKNK1	-0.316935	CD16+ monocyte	0.00951952	1
TXNDC12	0.341663	CD16+ monocyte	0.00499003	1
ZYG11B	-0.329215	CD16+ monocyte	0.00695175	1
TMEM59	0.349641	CD16+ monocyte	0.00400647	1
LEPROT	0.333768	CD16+ monocyte	0.00616724	1
ANKRD13C	-0.536461	CD16+ monocyte	3.43601e-06	0.0172797
BCL10	-0.399912	CD16+ monocyte	0.000878424	1
GBP2	-0.394921	CD16+ monocyte	0.00103243	1
CDC14A	-0.327231	CD16+ monocyte	0.00732014	1
FAM102B	-0.341371	CD16+ monocyte	0.00502981	1
DRAM2	0.405217	CD16+ monocyte	0.000737808	1
CAPZA1	-0.332996	CD16+ monocyte	0.00629463	1
RHOC	-0.455405	CD16+ monocyte	0.000121975	0.606704
MAN1A2	-0.498846	CD16+ monocyte	2.01583e-05	0.101033
NBPF26	-0.48786	CD16+ monocyte	3.25272e-05	0.162798
NBPF12	-0.405656	CD16+ monocyte	0.000727149	1
NBPF11	-0.412297	CD16+ monocyte	0.000581931	1
RPRD2	-0.381408	CD16+ monocyte	0.00157913	1
ARNT	-0.373534	CD16+ monocyte	0.00200644	1
CDC42SE1	-0.329487	CD16+ monocyte	0.00690262	1
PI4KB	-0.39348	CD16+ monocyte	0.00108122	1
S100A9	0.391454	CD16+ monocyte	0.00115334	1
S100A8	0.424954	CD16+ monocyte	0.000375755	1
GATAD2B	-0.50154	CD16+ monocyte	1.78811e-05	0.089638
SLC39A1	0.445526	CD16+ monocyte	0.000177767	0.881369
KHDC4	-0.403546	CD16+ monocyte	0.000779721	1
DUSP23	0.335439	CD16+ monocyte	0.0058995	1
FCGR3A	-0.330114	CD16+ monocyte	0.00679042	1
UHMK1	-0.350289	CD16+ monocyte	0.00393476	1
MGST3	0.339867	CD16+ monocyte	0.00523885	1
POU2F1	-0.337904	CD16+ monocyte	0.00552327	1
KLHL20	-0.40221	CD16+ monocyte	0.000814792	1
RC3H1	-0.42155	CD16+ monocyte	0.000423383	1
MR1	0.342394	CD16+ monocyte	0.00489179	1
IER5	0.318877	CD16+ monocyte	0.00906529	1
AL157402.2	-0.493917	CD16+ monocyte	2.50361e-05	0.125406
IPO9	-0.320632	CD16+ monocyte	0.00867138	1
MIR29B2CHG	-0.365389	CD16+ monocyte	0.00255482	1
LPGAT1	-0.427669	CD16+ monocyte	0.000341332	1
RPS6KC1	-0.344044	CD16+ monocyte	0.00467631	1
DISC1	-0.350163	CD16+ monocyte	0.00394855	1
AKT3	-0.351646	CD16+ monocyte	0.00378808	1		yes
SMYD3	-0.372177	CD16+ monocyte	0.00208979	1
NLRP3	0.399328	CD16+ monocyte	0.000895323	1
ACP1	0.34559	CD16+ monocyte	0.00448212	1
NBAS	-0.377628	CD16+ monocyte	0.00177285	1
UBXN2A	-0.353985	CD16+ monocyte	0.0035467	1
LINC00486	-0.364428	CD16+ monocyte	0.00262761	1
CEBPZ	-0.423742	CD16+ monocyte	0.000392112	1
ATL2	-0.398325	CD16+ monocyte	0.000924978	1
SLC8A1-AS1	-0.459999	CD16+ monocyte	0.000101969	0.507604
PRKCE	-0.381993	CD16+ monocyte	0.00155092	1
AC018682.1	-0.485709	CD16+ monocyte	3.5654e-05	0.178306
PSME4	-0.370443	CD16+ monocyte	0.00220071	1
XPO1	-0.413195	CD16+ monocyte	0.000564463	1
COMMD1	-0.382765	CD16+ monocyte	0.00151435	1
EXOC6B	-0.347803	CD16+ monocyte	0.00421638	1
RNF181	0.329132	CD16+ monocyte	0.00696692	1
ST3GAL5	-0.393083	CD16+ monocyte	0.00109502	1
CIAO1	-0.440639	CD16+ monocyte	0.00021328	1
RNF149	-0.320465	CD16+ monocyte	0.00870824	1
MIR4435-2HG	-0.397531	CD16+ monocyte	0.000949083	1
CCDC93	-0.330907	CD16+ monocyte	0.00665059	1
SAP130	-0.412569	CD16+ monocyte	0.000576599	1
KYNU	-0.322156	CD16+ monocyte	0.00834127	1
GTDC1	-0.358726	CD16+ monocyte	0.00309896	1
AC009313.1	-0.408475	CD16+ monocyte	0.0006619	1
GCA	0.413237	CD16+ monocyte	0.000563662	1
TTC21B	-0.362507	CD16+ monocyte	0.00277876	1
STK39	-0.444962	CD16+ monocyte	0.000181568	0.900032
SLC25A12	-0.319838	CD16+ monocyte	0.00884769	1
MAP3K20	-0.405718	CD16+ monocyte	0.000725638	1
GPR155	-0.317708	CD16+ monocyte	0.00933649	1
AC010894.3	-0.451353	CD16+ monocyte	0.00014255	0.708046
AGPS	-0.323368	CD16+ monocyte	0.00808686	1
ANKRD44	-0.348367	CD16+ monocyte	0.00415096	1
PLCL1	-0.33924	CD16+ monocyte	0.00532818	1
FAM117B	-0.377795	CD16+ monocyte	0.00176386	1
NDUFS1	-0.423241	CD16+ monocyte	0.000399068	1
KLF7	-0.320109	CD16+ monocyte	0.00878703	1
AC009226.1	-0.468019	CD16+ monocyte	7.41301e-05	0.369687
PLEKHM3	-0.438488	CD16+ monocyte	0.000230883	1
KANSL1L	-0.386984	CD16+ monocyte	0.00132799	1
SP110	-0.390556	CD16+ monocyte	0.00118667	1
CAB39	-0.406554	CD16+ monocyte	0.000705759	1
PTMA	-0.412861	CD16+ monocyte	0.000570906	1
SNED1	-0.397657	CD16+ monocyte	0.000945239	1
AC005237.1	-0.439323	CD16+ monocyte	0.000223895	1
ITPR1	-0.336609	CD16+ monocyte	0.00571823	1
THUMPD3-AS1	-0.350874	CD16+ monocyte	0.00387097	1
TADA3	0.315034	CD16+ monocyte	0.00998303	1
ATG7	-0.373492	CD16+ monocyte	0.00200896	1
NR2C2	-0.321488	CD16+ monocyte	0.0084846	1
TBC1D5	-0.369566	CD16+ monocyte	0.00225883	1
UBE2E2	-0.317499	CD16+ monocyte	0.00938565	1
UBE2E1	-0.375038	CD16+ monocyte	0.00191761	1
TGFBR2	-0.322762	CD16+ monocyte	0.0082132	1
UBP1	-0.334855	CD16+ monocyte	0.00599202	1
LRRFIP2	-0.339721	CD16+ monocyte	0.00525957	1
OXSR1	-0.348702	CD16+ monocyte	0.00411262	1
RPSA	-0.374161	CD16+ monocyte	0.00196899	1
ULK4	-0.42038	CD16+ monocyte	0.000440976	1
AC006059.1	-0.482973	CD16+ monocyte	4.00334e-05	0.200047
LIMD1	-0.488424	CD16+ monocyte	3.17507e-05	0.158944
PBRM1	-0.40551	CD16+ monocyte	0.000730686	1
FAM208A	0.39749	CD16+ monocyte	0.000950367	1
PXK	-0.486628	CD16+ monocyte	3.42857e-05	0.171497
RYBP	-0.393333	CD16+ monocyte	0.00108629	1
GBE1	-0.4737	CD16+ monocyte	5.88582e-05	0.293702
CBLB	-0.323221	CD16+ monocyte	0.0081172	1
ZBTB20	-0.371174	CD16+ monocyte	0.00215331	1
GSK3B	-0.402669	CD16+ monocyte	0.000802579	1	yes
CSTA	0.43454	CD16+ monocyte	0.000266685	1
DIRC2	-0.408246	CD16+ monocyte	0.00066701	1
HEG1	-0.412861	CD16+ monocyte	0.000570906	1
TMCC1	-0.417205	CD16+ monocyte	0.000492136	1
RYK	-0.364052	CD16+ monocyte	0.00265659	1
MSL2	-0.335836	CD16+ monocyte	0.00583744	1
STAG1	-0.333581	CD16+ monocyte	0.00619801	1
NCK1	-0.320527	CD16+ monocyte	0.0086944	1
ARMC8	-0.317561	CD16+ monocyte	0.00937088	1
TFDP2	-0.389929	CD16+ monocyte	0.00121044	1
ATR	-0.397782	CD16+ monocyte	0.00094141	1	yes
ANKUB1	-0.491536	CD16+ monocyte	2.77658e-05	0.139051
SMC4	-0.37249	CD16+ monocyte	0.00207028	1
PHC3	-0.329926	CD16+ monocyte	0.00682391	1
DCUN1D1	-0.351646	CD16+ monocyte	0.00378808	1
YEATS2	-0.440325	CD16+ monocyte	0.000215765	1
SENP2	-0.371529	CD16+ monocyte	0.00213062	1
IGF2BP2	-0.353338	CD16+ monocyte	0.0036121	1
DGKG	-0.336212	CD16+ monocyte	0.00577918	1
ST6GAL1	-0.328297	CD16+ monocyte	0.0071203	1
OPA1	-0.323681	CD16+ monocyte	0.00802218	1
RNF168	-0.479673	CD16+ monocyte	4.5977e-05	0.229655
SENP5	-0.345778	CD16+ monocyte	0.00445899	1
TNIP2	0.323785	CD16+ monocyte	0.00800072	1
STIM2	-0.425747	CD16+ monocyte	0.000365379	1
KLHL5	-0.517121	CD16+ monocyte	8.76074e-06	0.044014
RBM47	-0.383872	CD16+ monocyte	0.0014633	1
SLC30A9	-0.38452	CD16+ monocyte	0.00143417	1
MRPL1	-0.353296	CD16+ monocyte	0.00361636	1
TBCK	-0.352315	CD16+ monocyte	0.00371767	1
SEC24B	-0.427732	CD16+ monocyte	0.000340573	1
NOCT	-0.413216	CD16+ monocyte	0.000564063	1
MGST2	0.397615	CD16+ monocyte	0.000946519	1
LRBA	-0.331763	CD16+ monocyte	0.00650257	1
RAPGEF2	-0.385689	CD16+ monocyte	0.00138286	1
SH3RF1	-0.378004	CD16+ monocyte	0.00175268	1
MRPL36	0.39018	CD16+ monocyte	0.00120088	1
MTMR12	-0.323472	CD16+ monocyte	0.00806525	1
ZFR	-0.382703	CD16+ monocyte	0.00151728	1
ARL15	-0.346947	CD16+ monocyte	0.00431746	1
SLC38A9	-0.392059	CD16+ monocyte	0.00113133	1
ZSWIM6	-0.36424	CD16+ monocyte	0.00264206	1
NLN	-0.402941	CD16+ monocyte	0.00079544	1
SREK1	-0.341287	CD16+ monocyte	0.00504123	1
TAF9	0.320506	CD16+ monocyte	0.00869901	1
SCAMP1	-0.354278	CD16+ monocyte	0.00351751	1
TENT2	-0.335105	CD16+ monocyte	0.00595222	1
SSBP2	-0.363091	CD16+ monocyte	0.00273196	1
MEF2C	-0.399098	CD16+ monocyte	0.000902042	1
FAM172A	-0.443855	CD16+ monocyte	0.000189247	0.937528
LNPEP	-0.384917	CD16+ monocyte	0.00141658	1
YTHDC2	-0.367122	CD16+ monocyte	0.00242802	1
AC116366.3	-0.347281	CD16+ monocyte	0.00427776	1
FAM13B	-0.321571	CD16+ monocyte	0.00846656	1
KDM3B	-0.432535	CD16+ monocyte	0.000286753	1
CD14	0.330343	CD16+ monocyte	0.00674968	1
FBXO38	-0.422489	CD16+ monocyte	0.000409713	1
FBXW11	-0.327043	CD16+ monocyte	0.00735591	1
AC022217.3	-0.410606	CD16+ monocyte	0.000616176	1
CPEB4	-0.366078	CD16+ monocyte	0.00250371	1
TMED9	0.399871	CD16+ monocyte	0.000879621	1
HNRNPAB	0.355844	CD16+ monocyte	0.00336473	1
MAML1	-0.321864	CD16+ monocyte	0.00840371	1
EXOC2	-0.358747	CD16+ monocyte	0.0030971	1
NEDD9	-0.326417	CD16+ monocyte	0.00747625	1
RANBP9	-0.36259	CD16+ monocyte	0.00277203	1
KDM1B	-0.319713	CD16+ monocyte	0.00887581	1
CDKAL1	-0.332703	CD16+ monocyte	0.00634344	1
HIST1H2AC	-0.377732	CD16+ monocyte	0.00176723	1
PPP1R11	0.515304	CD16+ monocyte	9.53817e-06	0.0479007
HLA-E	-0.361462	CD16+ monocyte	0.00286413	1
BAG6	0.387298	CD16+ monocyte	0.00131502	1
HLA-DRB1	0.415388	CD16+ monocyte	0.000523794	1
HLA-DQB1	0.487672	CD16+ monocyte	3.27899e-05	0.164081
TAPBP	0.419628	CD16+ monocyte	0.000452634	1
ZFAND3	-0.425079	CD16+ monocyte	0.000374099	1
PRIM2	-0.362757	CD16+ monocyte	0.00275862	1
FAM135A	-0.360251	CD16+ monocyte	0.00296607	1
AKIRIN2	0.352691	CD16+ monocyte	0.00367858	1
ASCC3	-0.418709	CD16+ monocyte	0.000467264	1
ARMC2	-0.351333	CD16+ monocyte	0.00382149	1
HDAC2	-0.386191	CD16+ monocyte	0.00136139	1	yes
MAN1A1	-0.374307	CD16+ monocyte	0.00196034	1
SGK1	0.327085	CD16+ monocyte	0.00734794	1
NHSL1	-0.358455	CD16+ monocyte	0.00312317	1
FUCA2	-0.366705	CD16+ monocyte	0.00245805	1
PHACTR2	-0.367477	CD16+ monocyte	0.00240275	1
SF3B5	0.337256	CD16+ monocyte	0.00562	1
UST	-0.388467	CD16+ monocyte	0.00126757	1
TIAM2	-0.401082	CD16+ monocyte	0.000845488	1
AGPAT4	-0.365827	CD16+ monocyte	0.00252219	1
RPS6KA2	-0.402043	CD16+ monocyte	0.000819275	1
FAM120B	-0.357202	CD16+ monocyte	0.00323712	1
BRAT1	-0.34962	CD16+ monocyte	0.0040088	1
UMAD1	-0.380134	CD16+ monocyte	0.00164218	1
SNX13	-0.416892	CD16+ monocyte	0.000497467	1
FAM126A	-0.426082	CD16+ monocyte	0.000361089	1
ZNRF2	-0.351772	CD16+ monocyte	0.00377479	1
RALA	-0.366475	CD16+ monocyte	0.0024747	1
CDK13	-0.42769	CD16+ monocyte	0.000341079	1
LANCL2	-0.359541	CD16+ monocyte	0.00302732	1
VOPP1	-0.346529	CD16+ monocyte	0.00436755	1
AC027644.4	-0.34465	CD16+ monocyte	0.00459934	1
MDH2	0.417122	CD16+ monocyte	0.000493552	1
CDK14	-0.486983	CD16+ monocyte	3.37702e-05	0.168952
ANKIB1	-0.385084	CD16+ monocyte	0.00140922	1
ZCWPW1	-0.38759	CD16+ monocyte	0.00130301	1
SPDYE2	-0.42817	CD16+ monocyte	0.000335301	1
ARMC10	0.440764	CD16+ monocyte	0.000212294	1
LINC01004	-0.337674	CD16+ monocyte	0.00555742	1
IMMP2L	-0.42015	CD16+ monocyte	0.000444509	1
AHCYL2	-0.497238	CD16+ monocyte	2.16431e-05	0.108454
LINC00513	-0.459436	CD16+ monocyte	0.00010425	0.518855
MKLN1	-0.326041	CD16+ monocyte	0.00754928	1
EXOC4	-0.390765	CD16+ monocyte	0.00117884	1
CNOT4	-0.371299	CD16+ monocyte	0.00214528	1
LUC7L2	-0.449619	CD16+ monocyte	0.00015229	0.755969
TBXAS1	-0.358434	CD16+ monocyte	0.00312504	1
GIMAP1	0.403003	CD16+ monocyte	0.0007938	1
LMBR1	-0.401479	CD16+ monocyte	0.000834571	1
DHRSX	-0.353442	CD16+ monocyte	0.00360148	1
TMSB4X	-0.398283	CD16+ monocyte	0.000926233	1
PIGA	-0.375184	CD16+ monocyte	0.00190917	1
AP1S2	0.367728	CD16+ monocyte	0.00238506	1
SH3KBP1	-0.337152	CD16+ monocyte	0.00563575	1
MED14	-0.456449	CD16+ monocyte	0.000117135	0.582863
KDM6A	-0.444711	CD16+ monocyte	0.000183281	0.908157
OTUD5	-0.315974	CD16+ monocyte	0.00975143	1
IGBP1	-0.375832	CD16+ monocyte	0.00187216	1
ABCB7	-0.389971	CD16+ monocyte	0.00120884	1
TSC22D3	-0.4487	CD16+ monocyte	0.000157698	0.782499
ENOX2	-0.365744	CD16+ monocyte	0.00252837	1
HPRT1	0.33122	CD16+ monocyte	0.0065961	1
BCAP31	0.329028	CD16+ monocyte	0.00698594	1
TNKS	-0.373221	CD16+ monocyte	0.00202541	1
PPP3CC	-0.404758	CD16+ monocyte	0.000749125	1
KIF13B	-0.390368	CD16+ monocyte	0.00119375	1
EIF4EBP1	0.31942	CD16+ monocyte	0.00894174	1
MRPL15	0.340306	CD16+ monocyte	0.0051771	1
COPS5	0.339595	CD16+ monocyte	0.0052774	1
RPL7	0.417581	CD16+ monocyte	0.000485807	1
PAG1	-0.371759	CD16+ monocyte	0.00211605	1
CPQ	-0.342666	CD16+ monocyte	0.00485574	1
STK3	-0.470881	CD16+ monocyte	6.60318e-05	0.329433
EXT1	-0.372678	CD16+ monocyte	0.00205866	1
SNTB1	-0.396759	CD16+ monocyte	0.000973097	1
ZHX2	-0.318606	CD16+ monocyte	0.00912763	1
CCDC26	-0.386003	CD16+ monocyte	0.00136941	1
ASAP1	-0.388948	CD16+ monocyte	0.00124853	1
TRAPPC9	-0.400936	CD16+ monocyte	0.000849543	1
AGO2	-0.466161	CD16+ monocyte	7.98723e-05	0.398004
TSTA3	0.430384	CD16+ monocyte	0.000309812	1
RIC1	-0.329842	CD16+ monocyte	0.00683884	1
SNAPC3	-0.361462	CD16+ monocyte	0.00286413	1
CNTLN	-0.40104	CD16+ monocyte	0.000846645	1
DENND4C	-0.366642	CD16+ monocyte	0.00246258	1
SMIM27	0.316956	CD16+ monocyte	0.00951453	1
UBAP2	-0.391913	CD16+ monocyte	0.00113661	1
UBAP1	-0.343355	CD16+ monocyte	0.00476528	1
FGD3	-0.424891	CD16+ monocyte	0.000376586	1
TRMO	-0.320611	CD16+ monocyte	0.00867598	1
ABCA1	-0.321885	CD16+ monocyte	0.00839924	1
SUSD1	-0.330239	CD16+ monocyte	0.00676817	1
PSMD5	-0.325143	CD16+ monocyte	0.00772628	1
NDUFA8	0.357264	CD16+ monocyte	0.00323134	1
RABGAP1	-0.368208	CD16+ monocyte	0.00235147	1
SLC27A4	-0.426771	CD16+ monocyte	0.000352386	1
ODF2	-0.328777	CD16+ monocyte	0.00703175	1
PRRC2B	-0.321927	CD16+ monocyte	0.0083903	1
MED27	-0.451791	CD16+ monocyte	0.000140178	0.696545
VAV2	-0.381304	CD16+ monocyte	0.00158422	1
PAXX	0.356763	CD16+ monocyte	0.00327787	1
IFITM2	-0.332077	CD16+ monocyte	0.00644914	1
TALDO1	0.348284	CD16+ monocyte	0.0041606	1
OSBPL5	-0.33191	CD16+ monocyte	0.00647759	1
STIM1	-0.317353	CD16+ monocyte	0.0094202	1
HBB	-0.373764	CD16+ monocyte	0.00199264	1
CTR9	-0.440806	CD16+ monocyte	0.000211966	1
USP47	-0.362277	CD16+ monocyte	0.00279735	1
PIK3C2A	-0.330176	CD16+ monocyte	0.00677929	1
AMBRA1	-0.446612	CD16+ monocyte	0.000170652	0.846262
PTPRJ	-0.377398	CD16+ monocyte	0.00178529	1
UBE2L6	0.377523	CD16+ monocyte	0.00177849	1
PATL1	-0.396821	CD16+ monocyte	0.00097113	1
MS4A6A	0.356763	CD16+ monocyte	0.00327787	1
AHNAK	0.363467	CD16+ monocyte	0.00270224	1
SLC3A2	0.366914	CD16+ monocyte	0.00244299	1
NUDT22	0.39513	CD16+ monocyte	0.00102553	1
DNAJC4	0.364804	CD16+ monocyte	0.00259891	1
FAM89B	0.338008	CD16+ monocyte	0.0055078	1
MAP3K11	0.320632	CD16+ monocyte	0.00867138	1
PACS1	-0.316601	CD16+ monocyte	0.00959963	1
NDUFV1	-0.333309	CD16+ monocyte	0.00624271	1
ARAP1	-0.413133	CD16+ monocyte	0.000565666	1
FAM168A	-0.494335	CD16+ monocyte	2.45837e-05	0.123164
RAB6A	-0.349788	CD16+ monocyte	0.00399017	1
KCNE3	-0.364992	CD16+ monocyte	0.00258466	1
ACER3	-0.374202	CD16+ monocyte	0.00196652	1
GAB2	-0.349077	CD16+ monocyte	0.00406986	1
AP003086.2	-0.460334	CD16+ monocyte	0.00010064	0.501084
HIKESHI	0.355573	CD16+ monocyte	0.00339078	1
SMCO4	0.345255	CD16+ monocyte	0.00452349	1
CASP4	0.321613	CD16+ monocyte	0.00845756	1
CWF19L2	-0.455614	CD16+ monocyte	0.000120993	0.601938
CUL5	-0.334291	CD16+ monocyte	0.00608245	1
ATM	-0.463466	CD16+ monocyte	8.89262e-05	0.442853	yes
PCSK7	0.389846	CD16+ monocyte	0.00121364	1
UBASH3B	-0.393856	CD16+ monocyte	0.0010683	1
LARP4B	-0.334207	CD16+ monocyte	0.00609594	1
CAMK1D	-0.396132	CD16+ monocyte	0.00099297	1
MINDY3	-0.430238	CD16+ monocyte	0.000311439	1
PLXDC2	-0.431971	CD16+ monocyte	0.00029264	1
PIP4K2A	-0.514803	CD16+ monocyte	9.76369e-06	0.0490137
APBB1IP	-0.340744	CD16+ monocyte	0.005116	1
ZNF438	-0.422301	CD16+ monocyte	0.000412414	1		yes
MAPK8	-0.3581	CD16+ monocyte	0.00315509	1	yes
TIMM23B	-0.341559	CD16+ monocyte	0.0050042	1
SGMS1	-0.421466	CD16+ monocyte	0.000424618	1
SRGN	0.39277	CD16+ monocyte	0.00110602	1
MCU	-0.518687	CD16+ monocyte	8.1384e-06	0.0408955
CHCHD1	0.369086	CD16+ monocyte	0.00229123	1
ADK	-0.34891	CD16+ monocyte	0.00408882	1
KAT6B	-0.377607	CD16+ monocyte	0.00177398	1
ZMIZ1	-0.394858	CD16+ monocyte	0.00103451	1
PAPSS2	-0.502814	CD16+ monocyte	1.68898e-05	0.0846853
PCGF5	-0.391913	CD16+ monocyte	0.00113661	1
CPEB3	-0.415033	CD16+ monocyte	0.000530192	1
EXOC6	-0.370213	CD16+ monocyte	0.0022158	1
ENTPD1-AS1	-0.523198	CD16+ monocyte	6.56875e-06	0.0330211
PIK3AP1	-0.410167	CD16+ monocyte	0.000625348	1
LCOR	-0.371529	CD16+ monocyte	0.00213062	1
FRAT2	0.513633	CD16+ monocyte	1.03094e-05	0.0517324
OGA	-0.392582	CD16+ monocyte	0.00111267	1
GBF1	-0.454611	CD16+ monocyte	0.000125776	0.625485
SUFU	-0.504172	CD16+ monocyte	1.58898e-05	0.0796876
NT5C2	-0.385439	CD16+ monocyte	0.00139372	1
GRK5	-0.361442	CD16+ monocyte	0.00286586	1
INPP5F	-0.485229	CD16+ monocyte	3.63893e-05	0.181946
ADIPOR2	-0.351876	CD16+ monocyte	0.00376374	1
YBX3	0.407786	CD16+ monocyte	0.000677339	1
BORCS5	-0.36282	CD16+ monocyte	0.0027536	1
ARHGDIB	-0.38901	CD16+ monocyte	0.00124607	1
EPS8	-0.358747	CD16+ monocyte	0.0030971	1	yes
ETNK1	-0.393313	CD16+ monocyte	0.00108701	1
LRMP	-0.438091	CD16+ monocyte	0.000234272	1
FGFR1OP2	0.449285	CD16+ monocyte	0.000154237	0.765478
MED21	-0.336901	CD16+ monocyte	0.00567368	1
CCDC91	-0.343814	CD16+ monocyte	0.0047058	1
TFCP2	-0.324746	CD16+ monocyte	0.00780563	1
PRR13	-0.335586	CD16+ monocyte	0.00587657	1
BAZ2A	-0.341162	CD16+ monocyte	0.0050584	1		yes
NACA	-0.355009	CD16+ monocyte	0.00344546	1
LYZ	0.321885	CD16+ monocyte	0.00839924	1
GLIPR1	0.339032	CD16+ monocyte	0.00535826	1
ATP2B1-AS1	0.352503	CD16+ monocyte	0.00369808	1
CRADD	-0.341559	CD16+ monocyte	0.0050042	1		yes
SNRPF	0.346843	CD16+ monocyte	0.00432994	1
CDK17	-0.450413	CD16+ monocyte	0.000147757	0.733763
SCYL2	-0.368292	CD16+ monocyte	0.00234567	1
CRY1	-0.344441	CD16+ monocyte	0.00462575	1
SH2B3	-0.341078	CD16+ monocyte	0.00506987	1
ATXN2	-0.562108	CD16+ monocyte	9.04849e-07	0.00455229
ALDH2	0.395923	CD16+ monocyte	0.000999675	1
TRIAP1	-0.322783	CD16+ monocyte	0.00820882	1
SPPL3	-0.359228	CD16+ monocyte	0.00305469	1
KDM2B	-0.38122	CD16+ monocyte	0.00158829	1
CHFR	-0.466892	CD16+ monocyte	7.75669e-05	0.386748
XPO4	-0.410898	CD16+ monocyte	0.000610129	1
LATS2	-0.376207	CD16+ monocyte	0.00185097	1
SAP18	-0.444878	CD16+ monocyte	0.000182137	0.902672
FRY	-0.46378	CD16+ monocyte	8.78268e-05	0.437465
SUPT20H	0.321216	CD16+ monocyte	0.00854344	1
KPNA3	-0.491244	CD16+ monocyte	2.81195e-05	0.140794
WDFY2	-0.483558	CD16+ monocyte	3.90575e-05	0.19521
DIS3	-0.315828	CD16+ monocyte	0.00978714	1
KLF12	-0.538382	CD16+ monocyte	3.12093e-06	0.0156983
KCTD12	0.416286	CD16+ monocyte	0.000507922	1
UBAC2	-0.341935	CD16+ monocyte	0.00495334	1
ARHGEF7	-0.332808	CD16+ monocyte	0.00632597	1
DAD1	0.334813	CD16+ monocyte	0.00599868	1
RBM23	-0.368083	CD16+ monocyte	0.00236019	1
DHRS4L2	0.330636	CD16+ monocyte	0.00669814	1
IRF9	0.355447	CD16+ monocyte	0.00340286	1
MIA2	-0.334541	CD16+ monocyte	0.00604211	1
NEMF	-0.394524	CD16+ monocyte	0.00104567	1
TMX1	0.360648	CD16+ monocyte	0.00293232	1
GNG2	-0.389094	CD16+ monocyte	0.00124279	1
SAMD4A	-0.372218	CD16+ monocyte	0.00208718	1
PPM1A	-0.409415	CD16+ monocyte	0.000641361	1
ZBTB1	-0.326145	CD16+ monocyte	0.00752893	1
GPHN	-0.426291	CD16+ monocyte	0.000358431	1
RAD51B	-0.437464	CD16+ monocyte	0.000239716	1
ERH	0.42132	CD16+ monocyte	0.000426788	1
SNW1	0.353067	CD16+ monocyte	0.00363985	1
LINC02328	-0.385773	CD16+ monocyte	0.00137926	1
CALM1	-0.402774	CD16+ monocyte	0.000799826	1
RPS6KA5	-0.507179	CD16+ monocyte	1.38675e-05	0.0695595
CCDC88C	-0.388384	CD16+ monocyte	0.00127091	1
NDUFB1	0.332954	CD16+ monocyte	0.00630159	1
RIN3	-0.354591	CD16+ monocyte	0.00348647	1
SETD3	-0.407076	CD16+ monocyte	0.000693587	1
WARS	-0.32224	CD16+ monocyte	0.0083235	1
AL157871.4	-0.474912	CD16+ monocyte	5.60033e-05	0.279569
MARK3	-0.393793	CD16+ monocyte	0.00107044	1
EMC7	0.451687	CD16+ monocyte	0.00014074	0.699194
SPRED1	-0.326333	CD16+ monocyte	0.00749243	1
TTBK2	-0.328735	CD16+ monocyte	0.00703941	1
SPG11	-0.34229	CD16+ monocyte	0.00490572	1
TCF12	-0.37013	CD16+ monocyte	0.00222131	1
MINDY2	-0.351187	CD16+ monocyte	0.00383717	1
USP3-AS1	-0.521319	CD16+ monocyte	7.18485e-06	0.0361111
HERC1	-0.324746	CD16+ monocyte	0.00780563	1
FAM96A	0.325185	CD16+ monocyte	0.00771796	1
AC069368.1	-0.466369	CD16+ monocyte	7.92072e-05	0.394848
DENND4A	-0.482368	CD16+ monocyte	4.1068e-05	0.205176
RAB11A	-0.365201	CD16+ monocyte	0.00256891	1
SMAD3	-0.404215	CD16+ monocyte	0.000762703	1
MAP2K5	-0.370422	CD16+ monocyte	0.00220208	1
CLK3	0.422239	CD16+ monocyte	0.000413319	1
IDH3A	-0.355343	CD16+ monocyte	0.00341296	1
WHAMM	-0.319942	CD16+ monocyte	0.00882432	1
ZNF592	-0.524222	CD16+ monocyte	6.25441e-06	0.0314472
PDE8A	-0.474348	CD16+ monocyte	5.7316e-05	0.286064
AC013394.1	-0.383434	CD16+ monocyte	0.00148334	1
STUB1	0.357515	CD16+ monocyte	0.00320829	1	yes
RPS2	0.359123	CD16+ monocyte	0.00306387	1
ABCC1	-0.452167	CD16+ monocyte	0.000138174	0.686725
TNRC6A	-0.338238	CD16+ monocyte	0.00547392	1
ARHGAP17	-0.360543	CD16+ monocyte	0.00294117	1
NSMCE1	0.325832	CD16+ monocyte	0.00759012	1
AC009093.2	-0.320882	CD16+ monocyte	0.00861634	1
ITGAL	-0.32886	CD16+ monocyte	0.00701645	1
BCKDK	0.343981	CD16+ monocyte	0.00468433	1
ITFG1	-0.321363	CD16+ monocyte	0.00851171	1
FTO	-0.322219	CD16+ monocyte	0.00832794	1
NUP93	-0.321759	CD16+ monocyte	0.00842611	1
CBFB	-0.397845	CD16+ monocyte	0.000939501	1
NUTF2	0.394503	CD16+ monocyte	0.00104637	1
NFATC3	-0.483955	CD16+ monocyte	3.84079e-05	0.192001
TANGO6	-0.358726	CD16+ monocyte	0.00309896	1
NFAT5	-0.382682	CD16+ monocyte	0.00151826	1
WWOX	-0.514552	CD16+ monocyte	9.8783e-06	0.0495792
COTL1	-0.336943	CD16+ monocyte	0.00566735	1
ABR	-0.328672	CD16+ monocyte	0.00705092	1
METTL16	-0.393145	CD16+ monocyte	0.00109283	1
RAP1GAP2	-0.401186	CD16+ monocyte	0.000842603	1
CXCL16	-0.352085	CD16+ monocyte	0.00374174	1		yes
PSMB6	0.370339	CD16+ monocyte	0.00220756	1
PFN1	-0.369796	CD16+ monocyte	0.00224347	1
RPAIN	0.31706	CD16+ monocyte	0.00948963	1
ACADVL	0.425225	CD16+ monocyte	0.000372176	1
SAT2	0.34749	CD16+ monocyte	0.00425311	1
MAP2K4	-0.478942	CD16+ monocyte	4.73996e-05	0.236714
KSR1	-0.330698	CD16+ monocyte	0.00668714	1
LGALS9	-0.34866	CD16+ monocyte	0.0041174	1
FAM222B	-0.33688	CD16+ monocyte	0.00567686	1
ABHD15-AS1	-0.417143	CD16+ monocyte	0.000493198	1
CRLF3	-0.322031	CD16+ monocyte	0.00836798	1
EVI2A	0.35315	CD16+ monocyte	0.00363129	1
STAT5B	-0.352524	CD16+ monocyte	0.00369591	1	yes
SLC25A39	0.347741	CD16+ monocyte	0.0042237	1
GPATCH8	-0.317812	CD16+ monocyte	0.00931199	1
NME2	0.375309	CD16+ monocyte	0.00190195	1
SCPEP1	0.335878	CD16+ monocyte	0.00583094	1
TEX14	-0.439845	CD16+ monocyte	0.000219626	1
BCAS3	-0.368605	CD16+ monocyte	0.00232405	1
PSMD12	-0.32437	CD16+ monocyte	0.00788147	1
ARSG	-0.371926	CD16+ monocyte	0.00210551	1		yes
FAM20A	-0.347114	CD16+ monocyte	0.00429757	1
CD300A	0.352524	CD16+ monocyte	0.00369591	1
CD300C	0.438488	CD16+ monocyte	0.000230883	1
AC011933.4	-0.412778	CD16+ monocyte	0.000572527	1
GAA	0.453817	CD16+ monocyte	0.000129686	0.644668
AP001011.1	-0.508955	CD16+ monocyte	1.2789e-05	0.0641626
NPC1	-0.341329	CD16+ monocyte	0.00503552	1
MAPRE2	-0.442498	CD16+ monocyte	0.00019907	0.985995
SETBP1	-0.429131	CD16+ monocyte	0.000324013	1
EPG5	-0.35315	CD16+ monocyte	0.00363129	1
DYM	-0.613131	CD16+ monocyte	4.43359e-08	0.000223143
WDR7	-0.466328	CD16+ monocyte	7.93398e-05	0.39543
AC104365.1	-0.517079	CD16+ monocyte	8.77793e-06	0.0440915
ZNF407	-0.389407	CD16+ monocyte	0.00123057	1
NFATC1	-0.366308	CD16+ monocyte	0.00248688	1
PRNP	0.392978	CD16+ monocyte	0.00109868	1
SLC23A2	-0.392456	CD16+ monocyte	0.00111713	1
DLGAP4	-0.357954	CD16+ monocyte	0.00316831	1
PPP1R16B	-0.361045	CD16+ monocyte	0.00289892	1		yes
STK4	-0.469878	CD16+ monocyte	6.87712e-05	0.343031
NCOA3	-0.334562	CD16+ monocyte	0.00603876	1
SMIM25	-0.434102	CD16+ monocyte	0.000270961	1
PPDPF	-0.375999	CD16+ monocyte	0.00186272	1
AC005786.3	-0.323702	CD16+ monocyte	0.00801788	1
AC008878.3	-0.315285	CD16+ monocyte	0.00992081	1
MYO1F	-0.386149	CD16+ monocyte	0.00136316	1
TMEM205	0.607742	CD16+ monocyte	6.25233e-08	0.000314617
ELOF1	0.362444	CD16+ monocyte	0.00278382	1
ASNA1	0.40127	CD16+ monocyte	0.000840301	1
DNASE2	0.383643	CD16+ monocyte	0.00147377	1		yes
EPS15L1	-0.375999	CD16+ monocyte	0.00186272	1
MRPL34	0.45411	CD16+ monocyte	0.000128233	0.637572
REX1BD	0.318564	CD16+ monocyte	0.00913725	1
PDCD5	0.408496	CD16+ monocyte	0.000661437	1
TYROBP	0.35173	CD16+ monocyte	0.00377922	1
SIPA1L3	-0.447426	CD16+ monocyte	0.000165488	0.820986
SPINT2	0.464552	CD16+ monocyte	8.51684e-05	0.424309
BLVRB	0.515032	CD16+ monocyte	9.65971e-06	0.0485014
RPS19	-0.441599	CD16+ monocyte	0.000205824	1
OPA3	-0.318	CD16+ monocyte	0.00926804	1
CALM3	-0.368543	CD16+ monocyte	0.00232836	1
DHX34	-0.338008	CD16+ monocyte	0.0055078	1
IRF3	0.393459	CD16+ monocyte	0.00108195	1
EMC10	0.333977	CD16+ monocyte	0.0061332	1
C22orf39	0.390577	CD16+ monocyte	0.00118588	1
SDF2L1	0.322908	CD16+ monocyte	0.00818255	1
MTMR3	-0.364428	CD16+ monocyte	0.00262761	1
HMGXB4	-0.330677	CD16+ monocyte	0.00669081	1
RBFOX2	-0.341245	CD16+ monocyte	0.00504694	1
CSF2RB	-0.446988	CD16+ monocyte	0.00016825	0.834522
CYTH4	0.384332	CD16+ monocyte	0.00144258	1
SH3BP1	0.384938	CD16+ monocyte	0.00141565	1
SREBF2	-0.383705	CD16+ monocyte	0.00147091	1
PACSIN2	-0.366266	CD16+ monocyte	0.00248993	1
AP000311.1	-0.47771	CD16+ monocyte	4.98903e-05	0.249102
DOPEY2	-0.36376	CD16+ monocyte	0.00267933	1
MORC3	-0.406241	CD16+ monocyte	0.000713155	1
MT-ND4L	-0.380948	CD16+ monocyte	0.00160161	1
ISG15	0.366264	CD16+ NK	0.00105281	1
SSU72	0.459757	CD16+ NK	2.59446e-05	0.0837491
MIB2	0.356348	CD16+ NK	0.00146812	1
CDK11A	-0.312673	CD16+ NK	0.00562983	1
AKR7A2	0.422276	CD16+ NK	0.000130554	0.417905
DDOST	0.390515	CD16+ NK	0.000446044	1
SYTL1	0.318735	CD16+ NK	0.00472464	1
RCC1	-0.364239	CD16+ NK	0.00112776	1
ZBTB8OS	0.348286	CD16+ NK	0.00190912	1
SFPQ	0.412991	CD16+ NK	0.000189368	0.603707
MAP7D1	0.296273	CD16+ NK	0.0088893	1
LSM10	0.344065	CD16+ NK	0.00218471	1
MRPS15	0.376194	CD16+ NK	0.000746616	1
MEAF6	0.422999	CD16+ NK	0.000126768	0.406039
C1orf122	0.338476	CD16+ NK	0.00260441	1
AKIRIN1	0.395802	CD16+ NK	0.00036661	1
PRDX1	0.371538	CD16+ NK	0.000878344	1	yes
UQCRH	0.328546	CD16+ NK	0.00353105	1
EFCAB14	0.375404	CD16+ NK	0.000767594	1
CMPK1	0.389305	CD16+ NK	0.000466306	1
MAGOH	0.355165	CD16+ NK	0.00152649	1
SERBP1	0.339909	CD16+ NK	0.00249039	1
GNG5	0.298127	CD16+ NK	0.00845243	1
DR1	0.332834	CD16+ NK	0.00309991	1
PSMA5	0.345538	CD16+ NK	0.00208474	1
LAMTOR5	0.355572	CD16+ NK	0.00150616	1
RHOC	0.304203	CD16+ NK	0.00714997	1
POLR3GL	0.379797	CD16+ NK	0.000657292	1
SF3B4	0.304769	CD16+ NK	0.00703824	1
APH1A	0.309674	CD16+ NK	0.00613174	1
MCL1	0.332899	CD16+ NK	0.00309368	1
CDC42SE1	0.395394	CD16+ NK	0.00037224	1
PSMB4	0.401904	CD16+ NK	0.000291151	0.92557
ILF2	0.301731	CD16+ NK	0.00765698	1
JTB	0.359846	CD16+ NK	0.00130719	1
HAX1	0.373261	CD16+ NK	0.000827318	1
DPM3	0.386636	CD16+ NK	0.000514025	1
FDPS	0.378232	CD16+ NK	0.000694816	1
LAMTOR2	0.340238	CD16+ NK	0.00246488	1
SH2D2A	0.317381	CD16+ NK	0.00491485	1
DUSP23	0.348918	CD16+ NK	0.00187071	1
TSTD1	0.412649	CD16+ NK	0.000191941	0.611715
NDUFS2	0.39233	CD16+ NK	0.000417156	1
TMCO1	0.424367	CD16+ NK	0.000119885	0.384112
MPC2	0.335161	CD16+ NK	0.00288608	1
UCHL5	0.346077	CD16+ NK	0.00204918	1
MDM4	0.319419	CD16+ NK	0.00463111	1
CAPN2	0.324759	CD16+ NK	0.00395559	1
RNF187	0.372577	CD16+ NK	0.000847241	1
RAB4A	0.320734	CD16+ NK	0.00445586	1
COX20	0.355178	CD16+ NK	0.00152583	1
ACP1	0.376338	CD16+ NK	0.000742828	1
ITGB1BP1	0.335451	CD16+ NK	0.00286045	1
SF3B6	0.311384	CD16+ NK	0.00584093	1
EML4	-0.313791	CD16+ NK	0.00545223	1
COX7A2L	0.372209	CD16+ NK	0.000858148	1
SNRPG	0.450564	CD16+ NK	3.92487e-05	0.12642
POLE4	0.451761	CD16+ NK	3.72144e-05	0.119979
CD8A	0.329598	CD16+ NK	0.00342057	1
ANKRD36C	0.330348	CD16+ NK	0.00334375	1
DUSP2	0.298522	CD16+ NK	0.00836194	1
BIN1	0.322628	CD16+ NK	0.00421384	1
AC010894.3	-0.334385	CD16+ NK	0.00295584	1
HNRNPA3	0.363516	CD16+ NK	0.00115568	1
ITGA4	0.296707	CD16+ NK	0.00878532	1
ORMDL1	0.38511	CD16+ NK	0.000543254	1
HSPE1	0.382664	CD16+ NK	0.000593302	1
RNPEPL1	0.305755	CD16+ NK	0.00684703	1
SUMF1	-0.420777	CD16+ NK	0.000138736	0.44354
BRK1	0.310871	CD16+ NK	0.00592687	1
UBE2E1	-0.343026	CD16+ NK	0.00225779	1
CMTM6	0.402785	CD16+ NK	0.000281519	0.895512
SS18L2	0.467608	CD16+ NK	1.80453e-05	0.0583224
NKTR	0.336121	CD16+ NK	0.00280181	1
IP6K2	-0.294576	CD16+ NK	0.00930617	1
NDUFAF3	0.356585	CD16+ NK	0.00145669	1
MANF	0.314132	CD16+ NK	0.0053989	1
TMF1	0.396973	CD16+ NK	0.000350877	1
CLDND1	0.36654	CD16+ NK	0.00104294	1
COX17	0.292472	CD16+ NK	0.00984688	1
FAM162A	0.311318	CD16+ NK	0.00585189	1
H1FX	0.338318	CD16+ NK	0.00261724	1
CDV3	0.455641	CD16+ NK	3.12742e-05	0.100891
RNF7	0.35402	CD16+ NK	0.0015849	1
SELENOT	0.312239	CD16+ NK	0.00570015	1
RAP2B	0.371709	CD16+ NK	0.000873155	1
SSR3	0.384847	CD16+ NK	0.000548445	1
TTC14	0.41741	CD16+ NK	0.000158863	0.507568
DNAJC19	0.441161	CD16+ NK	5.92192e-05	0.190153
FYTTD1	0.339962	CD16+ NK	0.0024863	1
SLBP	0.449131	CD16+ NK	4.18213e-05	0.134665
MXD4	0.320708	CD16+ NK	0.0044593	1
MFSD10	0.35744	CD16+ NK	0.00141608	1
BLOC1S4	0.443923	CD16+ NK	5.25458e-05	0.168935
KLF3	0.299903	CD16+ NK	0.00805189	1
COMMD8	0.442621	CD16+ NK	5.55997e-05	0.178697
OCIAD2	0.300153	CD16+ NK	0.00799688	1
CCNI	0.337555	CD16+ NK	0.00268007	1
HNRNPDL	0.328428	CD16+ NK	0.00354368	1
OSTC	0.420566	CD16+ NK	0.000139922	0.44719
C4orf3	0.386478	CD16+ NK	0.00051698	1
NDUFC1	0.489926	CD16+ NK	6.11504e-06	0.0197822
LSM6	0.37572	CD16+ NK	0.000759139	1
PDCD6	0.311108	CD16+ NK	0.00588707	1
CCT5	0.330243	CD16+ NK	0.00335444	1
SUB1	0.30874	CD16+ NK	0.00629589	1
PTGER4	0.306755	CD16+ NK	0.00665796	1
ARL15	-0.320156	CD16+ NK	0.00453223	1
TMEM167A	0.35648	CD16+ NK	0.00146176	1
EPB41L4A-AS1	0.396499	CD16+ NK	0.000357165	1
CDC42SE2	0.403259	CD16+ NK	0.000276465	0.879712
VDAC1	0.347721	CD16+ NK	0.00194412	1
TMEM173	0.339133	CD16+ NK	0.00255154	1
TAF7	0.402667	CD16+ NK	0.000282796	0.89929
RBM22	0.339593	CD16+ NK	0.00251511	1
DUSP1	0.368119	CD16+ NK	0.000988172	1
ATP6V0E1	0.374024	CD16+ NK	0.000805599	1
CLTB	0.45063	CD16+ NK	3.91343e-05	0.126091
PRELID1	0.466385	CD16+ NK	1.91066e-05	0.0617142
LMAN2	0.298127	CD16+ NK	0.00845243	1
GRK6	0.41478	CD16+ NK	0.000176424	0.563145
TMED9	0.34175	CD16+ NK	0.00235053	1
NHP2	0.334004	CD16+ NK	0.00299068	1
BTN3A2	0.330098	CD16+ NK	0.00336918	1
PPP1R18	0.305439	CD16+ NK	0.00690771	1
DDX39B	0.421118	CD16+ NK	0.00013683	0.437582
NCR3	0.417068	CD16+ NK	0.000161051	0.514237
TAP1	0.31049	CD16+ NK	0.00599149	1
BRD2	0.301889	CD16+ NK	0.0076237	1
RPL7L1	0.365659	CD16+ NK	0.00107471	1
SNX3	0.364186	CD16+ NK	0.00112977	1
GTF3C6	0.490676	CD16+ NK	5.88892e-06	0.0190565
TNFAIP3	0.331255	CD16+ NK	0.00325281	1
SYNE1	0.320853	CD16+ NK	0.00444038	1		yes
MPC1	0.411597	CD16+ NK	0.000200058	0.637384
RNASET2	0.315303	CD16+ NK	0.00521983	1
PSMB1	0.397788	CD16+ NK	0.000340286	1
PDCD2	0.318052	CD16+ NK	0.00481983	1
KDELR2	0.35143	CD16+ NK	0.00172468	1
CYCS	0.301047	CD16+ NK	0.00780268	1
HOTAIRM1	0.33983	CD16+ NK	0.00249655	1
LSM5	0.302191	CD16+ NK	0.00756027	1
UPP1	0.316789	CD16+ NK	0.00500006	1
SEC61G	0.315185	CD16+ NK	0.0052377	1		yes
BCL7B	0.382191	CD16+ NK	0.000603461	1
TMEM243	0.472264	CD16+ NK	1.44884e-05	0.046841
TP53TG1	0.301967	CD16+ NK	0.00760711	1
ATP5MF	0.294366	CD16+ NK	0.00935904	1
ZNF655	0.375904	CD16+ NK	0.000754247	1
GNB2	0.302967	CD16+ NK	0.00739966	1
ARF5	0.36437	CD16+ NK	0.00112275	1
SND1	-0.337936	CD16+ NK	0.00264849	1
NRF1	-0.391581	CD16+ NK	0.000428874	1
BRAF	-0.294471	CD16+ NK	0.00933257	1
SSBP1	0.316921	CD16+ NK	0.00498101	1
TRBC2	0.301586	CD16+ NK	0.0076876	1
ZYX	0.500684	CD16+ NK	3.5304e-06	0.011435
GIMAP4	0.356125	CD16+ NK	0.00147899	1
TMUB1	0.409295	CD16+ NK	0.000218927	0.697065
RAB9A	0.338962	CD16+ NK	0.00256519	1
RBBP7	0.39187	CD16+ NK	0.000424316	1
SAT1	0.414661	CD16+ NK	0.000177255	0.565443
EBP	0.356453	CD16+ NK	0.00146303	1
WAS	0.298745	CD16+ NK	0.00831104	1
PQBP1	0.300376	CD16+ NK	0.00794794	1
NBDY	0.331348	CD16+ NK	0.00324371	1
FUNDC2	0.425077	CD16+ NK	0.000116449	0.373219
CNOT7	0.299876	CD16+ NK	0.0080577	1
ASAH1	0.319406	CD16+ NK	0.00463289	1
PDLIM2	0.400392	CD16+ NK	0.000308392	0.979762
AC044849.1	0.368776	CD16+ NK	0.00096613	1
SMIM19	0.375549	CD16+ NK	0.000763708	1
UBE2V2	0.296339	CD16+ NK	0.00887347	1
COPS5	0.514822	CD16+ NK	1.66611e-06	0.0053982
TRAM1	0.294826	CD16+ NK	0.00924371	1
RPL7	0.301086	CD16+ NK	0.00779421	1
PEX2	0.448802	CD16+ NK	4.2433e-05	0.136592
POLR2K	0.337713	CD16+ NK	0.00266696	1
ZNF706	0.426261	CD16+ NK	0.000110923	0.355842
PUF60	0.299127	CD16+ NK	0.00822484	1
GPAA1	0.311371	CD16+ NK	0.00584312	1
CYC1	0.311213	CD16+ NK	0.00586946	1
SHARPIN	0.292485	CD16+ NK	0.00984342	1
VPS28	0.338265	CD16+ NK	0.00262153	1
RFX3	-0.343631	CD16+ NK	0.00221498	1
STOML2	0.36057	CD16+ NK	0.00127597	1
CCDC107	0.319354	CD16+ NK	0.00464003	1
TOMM5	0.304808	CD16+ NK	0.0070305	1
ISCA1	0.367106	CD16+ NK	0.00102301	1
POLE3	0.297062	CD16+ NK	0.00870104	1
ATP6V1G1	0.376785	CD16+ NK	0.000731227	1
SET	0.308596	CD16+ NK	0.00632167	1
SURF1	0.300166	CD16+ NK	0.00799399	1
DPP7	0.333241	CD16+ NK	0.00306147	1
SSNA1	0.303506	CD16+ NK	0.00728982	1
RNH1	0.493819	CD16+ NK	5.02343e-06	0.0162659
TALDO1	0.364002	CD16+ NK	0.00113683	1
POLR2L	0.299508	CD16+ NK	0.00813943	1
ASCL2	0.389319	CD16+ NK	0.000466082	1
NAP1L4	0.358952	CD16+ NK	0.00134673	1
TAF10	0.336214	CD16+ NK	0.00279384	1
RPL27A	0.323075	CD16+ NK	0.00415843	1
TMEM9B	0.36107	CD16+ NK	0.0012548	1
EIF4G2	0.350575	CD16+ NK	0.00177318	1
PDE3B	-0.306268	CD16+ NK	0.00674943	1
C11orf58	0.338357	CD16+ NK	0.00261402	1
SVIP	0.300534	CD16+ NK	0.00791355	1
DGKZ	0.379166	CD16+ NK	0.0006722	1
NDUFS3	0.331137	CD16+ NK	0.00326455	1
UBE2L6	0.294892	CD16+ NK	0.00922734	1
TMEM109	0.321655	CD16+ NK	0.00433671	1
SDHAF2	0.38486	CD16+ NK	0.000548184	1
TMEM258	0.332202	CD16+ NK	0.00316028	1
UBXN1	0.364883	CD16+ NK	0.0011034	1
FERMT3	0.357019	CD16+ NK	0.00143594	1
FKBP2	0.373682	CD16+ NK	0.00081527	1
TRMT112	0.363397	CD16+ NK	0.00116031	1
SF1	0.304927	CD16+ NK	0.00700733	1
EHD1	0.380284	CD16+ NK	0.000646006	1
FIBP	0.547529	CD16+ NK	2.56062e-07	0.000830151
BRMS1	0.342973	CD16+ NK	0.00226155	1
GRK2	0.382572	CD16+ NK	0.000595265	1
RPS6KB2	0.376062	CD16+ NK	0.000750076	1
AIP	0.357124	CD16+ NK	0.00143096	1
CDK2AP2	0.315066	CD16+ NK	0.00525562	1
TCIRG1	0.298048	CD16+ NK	0.00847063	1
LAMTOR1	0.360241	CD16+ NK	0.00129007	1
NDUFC2	0.328467	CD16+ NK	0.00353947	1
CTSC	0.385584	CD16+ NK	0.000534025	1
ANKRD49	0.296891	CD16+ NK	0.00874153	1
TMEM123	0.315645	CD16+ NK	0.00516852	1
FDX1	0.397262	CD16+ NK	0.000347085	1
IL10RA	0.320853	CD16+ NK	0.00444038	1
CD3E	0.29697	CD16+ NK	0.00872282	1
ITGB1	0.32756	CD16+ NK	0.00363751	1
HNRNPH3	0.307925	CD16+ NK	0.0064424	1
ADK	-0.333425	CD16+ NK	0.00304424	1
ANXA11	0.37981	CD16+ NK	0.000656984	1
TSPAN14	0.327915	CD16+ NK	0.00359886	1
GHITM	0.31287	CD16+ NK	0.00559812	1
PGAM1	0.389174	CD16+ NK	0.000468559	1
BLOC1S2	0.491991	CD16+ NK	5.51104e-06	0.0178392
FBXL15	0.294484	CD16+ NK	0.00932927	1
SMC3	0.306334	CD16+ NK	0.006737	1
ADIPOR2	-0.376759	CD16+ NK	0.000731905	1
NDUFA9	0.310897	CD16+ NK	0.00592243	1
MLF2	0.331242	CD16+ NK	0.00325411	1
PHB2	0.374944	CD16+ NK	0.000780077	1
FKBP11	0.321879	CD16+ NK	0.0043082	1
TUBA1B	0.348352	CD16+ NK	0.00190508	1
COX14	0.296431	CD16+ NK	0.00885136	1
AC074032.1	-0.317802	CD16+ NK	0.00485504	1
ITGB7	0.375418	CD16+ NK	0.00076724	1
CNPY2	0.29939	CD16+ NK	0.00816586	1
CAND1	0.306268	CD16+ NK	0.00674943	1
SNRPF	0.296773	CD16+ NK	0.00876965	1
GNPTAB	0.331768	CD16+ NK	0.00320239	1
ISCU	0.32343	CD16+ NK	0.00411489	1
SRSF9	0.441187	CD16+ NK	5.91521e-05	0.189997
DYNLL1	0.375707	CD16+ NK	0.00075949	1
ORAI1	0.464899	CD16+ NK	2.04744e-05	0.0661119
RHOF	0.350114	CD16+ NK	0.0017998	1
TMED2	0.3208	CD16+ NK	0.00444725	1
UBC	0.298693	CD16+ NK	0.00832299	1
RAN	0.373839	CD16+ NK	0.000810793	1
DAD1	0.31579	CD16+ NK	0.00514695	1
PABPN1	0.324877	CD16+ NK	0.00394166	1
CHURC1	0.297588	CD16+ NK	0.00857748	1
VTI1B	0.348168	CD16+ NK	0.0019164	1
ERH	0.338147	CD16+ NK	0.00263121	1
MED6	0.326166	CD16+ NK	0.00379283	1
AHSA1	0.355677	CD16+ NK	0.00150095	1
RPS6KA5	-0.314106	CD16+ NK	0.00540299	1
CCNK	-0.330072	CD16+ NK	0.00337187	1
NSMCE3	0.360754	CD16+ NK	0.00126813	1
KLF13	0.319958	CD16+ NK	0.00455853	1
EMC7	0.542663	CD16+ NK	3.42644e-07	0.00111051
DUT	0.343289	CD16+ NK	0.00223909	1
GTF2A2	0.425235	CD16+ NK	0.000115698	0.370927
ANXA2	0.337239	CD16+ NK	0.00270646	1
PKM	0.330243	CD16+ NK	0.00335444	1
SCAMP2	0.392238	CD16+ NK	0.000418579	1
RCN2	0.331426	CD16+ NK	0.00323593	1
PSTPIP1	0.293893	CD16+ NK	0.00947898	1
MESD	0.39308	CD16+ NK	0.000405732	1
WHAMM	0.355178	CD16+ NK	0.00152583	1
ISG20	0.305124	CD16+ NK	0.00696887	1
CIB1	0.305965	CD16+ NK	0.00680684	1
STUB1	0.376023	CD16+ NK	0.000751117	1	yes
FAM173A	0.299442	CD16+ NK	0.0081541	1
NME3	0.41111	CD16+ NK	0.000203918	0.649479
MRPS34	0.316842	CD16+ NK	0.00499243	1
SPSB3	0.332334	CD16+ NK	0.00314762	1
NUBP2	0.316513	CD16+ NK	0.00504027	1
RSL1D1	0.356545	CD16+ NK	0.00145859	1
GSPT1	0.353652	CD16+ NK	0.00160413	1
BFAR	0.323391	CD16+ NK	0.0041197	1
NDUFAB1	0.389871	CD16+ NK	0.000456733	1
TUFM	0.298535	CD16+ NK	0.00835894	1
MAZ	0.330703	CD16+ NK	0.0033079	1
2023-09-01	0.372511	CD16+ NK	0.000849179	1
BCL7C	0.467582	CD16+ NK	1.80675e-05	0.0583762
FUS	0.333412	CD16+ NK	0.00304547	1
PYCARD	0.339054	CD16+ NK	0.00255783	1
MT2A	0.292814	CD16+ NK	0.00975719	1
MT1X	0.397722	CD16+ NK	0.000341129	1
HERPUD1	0.294458	CD16+ NK	0.00933588	1
POLR2C	0.392133	CD16+ NK	0.000420211	1
USB1	0.413964	CD16+ NK	0.000182221	0.581101
CKLF	0.303914	CD16+ NK	0.00720773	1
CMTM3	0.294353	CD16+ NK	0.00936236	1
TMEM208	0.384939	CD16+ NK	0.000546623	1
ATP6V0D1	0.401168	CD16+ NK	0.000299433	0.951599
TMEM170A	0.365686	CD16+ NK	0.00107375	1
GABARAPL2	0.457561	CD16+ NK	2.86727e-05	0.0925267
WWOX	-0.325955	CD16+ NK	0.00381678	1
EMC6	0.310397	CD16+ NK	0.00600718	1
ITGAE	0.293327	CD16+ NK	0.009624	1
ARRB2	0.293669	CD16+ NK	0.00953608	1
NUP88	-0.350075	CD16+ NK	0.0018021	1
C1QBP	0.448802	CD16+ NK	4.2433e-05	0.136592
DERL2	0.446066	CD16+ NK	4.78547e-05	0.153901
ACADVL	0.325679	CD16+ NK	0.00384843	1
SAT2	0.421487	CD16+ NK	0.000134804	0.431236
CCL4L2	0.315816	CD16+ NK	0.00514303	1
ZNHIT3	0.307004	CD16+ NK	0.00661141	1
CISD3	0.375404	CD16+ NK	0.000767594	1
MIEN1	0.33891	CD16+ NK	0.0025694	1
CDK5RAP3	0.422381	CD16+ NK	0.000129997	0.416252
ATP5MC1	0.346682	CD16+ NK	0.00200994	1
SNF8	0.392843	CD16+ NK	0.000409308	1
PHB	0.39717	CD16+ NK	0.000348288	1
SRSF1	0.389621	CD16+ NK	0.000460941	1
PSMC5	0.355585	CD16+ NK	0.0015055	1
AMZ2	0.31575	CD16+ NK	0.00515282	1
RPL38	0.377259	CD16+ NK	0.000719124	1
METTL23	0.348181	CD16+ NK	0.00191559	1
2023-09-09	0.297101	CD16+ NK	0.00869171	1
MCRIP1	0.442174	CD16+ NK	5.6686e-05	0.182132
ANAPC11	0.342211	CD16+ NK	0.00231668	1
CENPX	0.452011	CD16+ NK	3.68023e-05	0.118687
L3MBTL4	-0.302928	CD16+ NK	0.00740775	1
PSMG2	0.320748	CD16+ NK	0.00445413	1
RPL17	0.299048	CD16+ NK	0.00824261	1
TXNL1	0.299074	CD16+ NK	0.00823669	1
RBCK1	0.417081	CD16+ NK	0.000160967	0.514127
DDRGK1	0.292669	CD16+ NK	0.00979505	1
COMMD7	0.327731	CD16+ NK	0.00361885	1
SCAND1	0.348286	CD16+ NK	0.00190912	1
NORAD	0.312778	CD16+ NK	0.0056129	1
PIGT	0.406271	CD16+ NK	0.000246218	0.783713
ADRM1	0.447737	CD16+ NK	4.44727e-05	0.143069
RGS19	0.33983	CD16+ NK	0.00249655	1
BSG	0.363634	CD16+ NK	0.00115107	1
RNF126	0.358781	CD16+ NK	0.00135442	1
C19orf24	0.427484	CD16+ NK	0.000105469	0.33845
PLEKHJ1	0.370381	CD16+ NK	0.000914208	1
OAZ1	0.369631	CD16+ NK	0.000938143	1
MRPL54	0.33891	CD16+ NK	0.0025694	1
MAP2K2	0.3574	CD16+ NK	0.00141793	1
MYDGF	0.314619	CD16+ NK	0.00532381	1
PET100	0.348602	CD16+ NK	0.00188983	1
STXBP2	0.306676	CD16+ NK	0.00667272	1
CD320	0.32877	CD16+ NK	0.00350731	1
CDKN2D	0.33044	CD16+ NK	0.00333442	1
JUNB	0.308385	CD16+ NK	0.00635933	1
TECR	0.33503	CD16+ NK	0.0028978	1
RASAL3	0.298943	CD16+ NK	0.00826636	1
RAB8A	0.4215	CD16+ NK	0.000134732	0.431141
MRPL34	0.390528	CD16+ NK	0.000445828	1
PGLS	0.322799	CD16+ NK	0.00419257	1
FKBP8	0.334859	CD16+ NK	0.0029131	1
UBA52	0.305873	CD16+ NK	0.0068244	1
ZNF430	0.30298	CD16+ NK	0.00739696	1
PDCD5	0.482127	CD16+ NK	9.00272e-06	0.0291148
TMEM147	0.39379	CD16+ NK	0.000395174	1
PSMD8	0.296746	CD16+ NK	0.00877592	1
ACTN4	0.306544	CD16+ NK	0.00669738	1
SERTAD1	0.369368	CD16+ NK	0.000946675	1
SERTAD3	0.3059	CD16+ NK	0.00681938	1
ZNF428	0.369934	CD16+ NK	0.000928418	1
NOP53	0.329559	CD16+ NK	0.00342466	1
SELENOW	0.392475	CD16+ NK	0.000414929	1
BAX	0.351864	CD16+ NK	0.00170052	1	yes
RPL13A	0.414727	CD16+ NK	0.000176793	0.564146
RPS11	0.31767	CD16+ NK	0.00487366	1
NR1H2	0.437137	CD16+ NK	7.03604e-05	0.225857
LENG1	0.327205	CD16+ NK	0.00367652	1
LENG8	0.317407	CD16+ NK	0.00491109	1
PPP6R1	0.425248	CD16+ NK	0.000115635	0.370842
C22orf39	0.354494	CD16+ NK	0.00156049	1
RANBP1	0.325863	CD16+ NK	0.00382731	1
SDF2L1	0.574266	CD16+ NK	4.74429e-08	0.000153857
DDT	0.321379	CD16+ NK	0.00437215	1
XBP1	0.31116	CD16+ NK	0.00587826	1
GGA1	0.330651	CD16+ NK	0.00331319	1
SH3BP1	0.361096	CD16+ NK	0.00125369	1
TOMM22	0.33499	CD16+ NK	0.00290133	1
GTPBP1	-0.451432	CD16+ NK	3.77633e-05	0.121711
CBX6	0.386912	CD16+ NK	0.000508889	1
NDUFA6	0.298561	CD16+ NK	0.00835294	1
TSPO	0.385058	CD16+ NK	0.000544289	1
C22orf34	-0.306636	CD16+ NK	0.00668011	1
CRELD2	0.318078	CD16+ NK	0.00481614	1
ATP5PF	0.292604	CD16+ NK	0.0098123	1
CSTB	0.306768	CD16+ NK	0.0066555	1
MT-CYB	0.351364	CD16+ NK	0.00172837	1
SDF4	0.300525	CD56+ NK	0.00834522	1
UBE4B	-0.323736	CD56+ NK	0.0043343	1
SYTL1	0.32044	CD56+ NK	0.00477167	1
TXNDC12	0.357342	CD56+ NK	0.00152997	1
PKN2	-0.340614	CD56+ NK	0.00260581	1
AC245297.3	0.298829	CD56+ NK	0.00873729	1
S100A11	0.311645	CD56+ NK	0.00613572	1
SFT2D2	0.303657	CD56+ NK	0.00766153	1
RGS1	0.384068	CD56+ NK	0.000614561	1
ITPKB	-0.340861	CD56+ NK	0.002586	1
RNF187	0.30828	CD56+ NK	0.00674228	1
MTR	-0.304423	CD56+ NK	0.00750201	1
CAMKMT	-0.341271	CD56+ NK	0.00255328	1
AFF3	-0.340054	CD56+ NK	0.00265143	1
MGAT5	-0.401603	CD56+ NK	0.000323515	1		yes
LINC01934	-0.332066	CD56+ NK	0.00338363	1
HSPD1	0.309553	CD56+ NK	0.00650703	1	yes
HSPE1	0.350886	CD56+ NK	0.00188544	1
RNPEPL1	0.316679	CD56+ NK	0.00531815	1
LSM3	0.294999	CD56+ NK	0.0096824	1
TBC1D5	-0.363716	CD56+ NK	0.00123951	1
FHIT	-0.426469	CD56+ NK	0.000122325	0.459699
FOXP1	-0.355044	CD56+ NK	0.00164889	1
ZNF148	-0.394586	CD56+ NK	0.000420004	1
NCK1	-0.329946	CD56+ NK	0.00360605	1
ARMC8	-0.304902	CD56+ NK	0.00740381	1
SEC62	-0.311891	CD56+ NK	0.00609329	1
RFC1	-0.321096	CD56+ NK	0.00468156	1
SCFD2	-0.296983	CD56+ NK	0.00918238	1
OSTC	0.394094	CD56+ NK	0.000427676	1
GZMK	0.321124	CD56+ NK	0.00467784	1
SSBP2	-0.294575	CD56+ NK	0.00979233	1
ERAP1	-0.341162	CD56+ NK	0.00256197	1
SRP19	0.321425	CD56+ NK	0.00463708	1
RBM22	0.298692	CD56+ NK	0.0087696	1
AC022217.3	-0.314093	CD56+ NK	0.00572514	1
ATP6V0E1	0.299499	CD56+ NK	0.00858047	1
GRK6	0.359449	CD56+ NK	0.00142782	1
MAPK14	-0.340478	CD56+ NK	0.00261687	1	yes
STK38	-0.298364	CD56+ NK	0.00884757	1
BACH2	-0.368216	CD56+ NK	0.00106553	1
CDK19	-0.30549	CD56+ NK	0.0072847	1
REV3L	-0.320973	CD56+ NK	0.00469834	1
ABRACL	0.302208	CD56+ NK	0.00797163	1
HIVEP2	-0.323203	CD56+ NK	0.00440257	1
STXBP5	-0.30973	CD56+ NK	0.00647473	1
RNASET2	0.348424	CD56+ NK	0.00203948	1
C7orf50	0.301483	CD56+ NK	0.00813077	1
KDELR2	0.362936	CD56+ NK	0.00127214	1
UMAD1	-0.362485	CD56+ NK	0.00129138	1
BZW2	-0.298255	CD56+ NK	0.00887369	1
ELMO1	-0.362718	CD56+ NK	0.00128143	1
TMEM248	0.445426	CD56+ NK	5.53041e-05	0.208054
BCL7B	0.344923	CD56+ NK	0.00227806	1
TRRAP	-0.322327	CD56+ NK	0.00451667	1
SPDYE2	-0.32732	CD56+ NK	0.00389955	1
IMMP2L	-0.371977	CD56+ NK	0.000937433	1
ARF5	0.344472	CD56+ NK	0.00231057	1
LINC00513	-0.294726	CD56+ NK	0.0097532	1
CHCHD3	-0.372046	CD56+ NK	0.00093524	1
EXOC4	-0.317362	CD56+ NK	0.00521485	1
DHRSX	-0.295451	CD56+ NK	0.00956656	1
USP9X	-0.336566	CD56+ NK	0.00295162	1
RBM3	0.307255	CD56+ NK	0.00693742	1
DIAPH2	-0.303904	CD56+ NK	0.00760993	1
POLR2K	0.332326	CD56+ NK	0.00335723	1
RFX3	-0.419384	CD56+ NK	0.000162639	0.610873
RIC1	-0.315119	CD56+ NK	0.00556045	1
OSTF1	0.357069	CD56+ NK	0.00154371	1
TLE1	0.410206	CD56+ NK	0.000233055	0.874887
SNHG7	0.320522	CD56+ NK	0.00476032	1
TUBB4B	0.2982	CD56+ NK	0.00888678	1
SIGIRR	0.311837	CD56+ NK	0.0061027	1
CD81	0.31832	CD56+ NK	0.00507322	1
HBB	-0.310223	CD56+ NK	0.00638602	1
PDE3B	-0.489277	CD56+ NK	7.28885e-06	0.0274352
AMBRA1	-0.400235	CD56+ NK	0.000340556	1
UBE2L6	0.309662	CD56+ NK	0.00648714	1
UBXN1	0.393766	CD56+ NK	0.000432862	1
BANF1	0.331532	CD56+ NK	0.00343841	1
CCS	0.385915	CD56+ NK	0.000575359	1
GRK2	0.301715	CD56+ NK	0.00807943	1
PPP6R3	-0.301496	CD56+ NK	0.00812774	1
WDR37	-0.304615	CD56+ NK	0.0074626	1
CAMK1D	-0.371882	CD56+ NK	0.000940513	1
ZEB1	-0.416949	CD56+ NK	0.000179105	0.672539
ANK3	-0.313998	CD56+ NK	0.00574073	1
ADK	-0.352856	CD56+ NK	0.00176983	1
SLC2A3	-0.320413	CD56+ NK	0.00477545	1
KLRG1	0.320235	CD56+ NK	0.00480014	1
KLRB1	0.313519	CD56+ NK	0.00581924	1
DIP2B	-0.346619	CD56+ NK	0.00215954	1
GLIPR1	0.328947	CD56+ NK	0.00371524	1
VEZT	-0.294316	CD56+ NK	0.00986025	1
HSP90B1	0.305723	CD56+ NK	0.00723808	1
MICU2	-0.322656	CD56+ NK	0.00447358	1
VWA8	-0.351885	CD56+ NK	0.00182601	1
TOX4	0.31196	CD56+ NK	0.00608155	1
BAZ1A	-0.296203	CD56+ NK	0.00937618	1
MAPK1IP1L	0.301961	CD56+ NK	0.00802537	1
GPHN	-0.32282	CD56+ NK	0.00445217	1
NUMB	-0.349259	CD56+ NK	0.00198606	1
TRAF3	-0.297598	CD56+ NK	0.00903186	1
SNRPN	0.490508	CD56+ NK	6.85753e-06	0.0258186
MAPK6	-0.35075	CD56+ NK	0.00189371	1
TCF12	-0.327169	CD56+ NK	0.003917	1
RORA-AS1	-0.461415	CD56+ NK	2.7272e-05	0.102624
USP3-AS1	-0.439955	CD56+ NK	6.98802e-05	0.262819
PIAS1	-0.362731	CD56+ NK	0.00128085	1
AC087286.2	-0.534536	CD56+ NK	6.56937e-07	0.00247402
AC013394.1	-0.297106	CD56+ NK	0.0091521	1
SPSB3	0.383056	CD56+ NK	0.000637068	1
HMOX2	0.297448	CD56+ NK	0.00906846	1
SOCS1	0.336128	CD56+ NK	0.00299136	1
ABCC1	-0.345675	CD56+ NK	0.00222479	1
NDUFAB1	0.296422	CD56+ NK	0.00932142	1
LAT	0.350052	CD56+ NK	0.00193643	1
C16orf54	0.31884	CD56+ NK	0.00499777	1
YPEL3	0.303247	CD56+ NK	0.0077482	1
FTO	-0.344472	CD56+ NK	0.00231057	1
ITGAE	0.38612	CD56+ NK	0.000571148	1
ARRB2	0.302344	CD56+ NK	0.00794191	1
NUP88	-0.353636	CD56+ NK	0.00172586	1
XAF1	0.420683	CD56+ NK	0.000154434	0.580207
MAP2K4	-0.338809	CD56+ NK	0.00275527	1
CCL4	0.371923	CD56+ NK	0.000939192	1
FBXL20	-0.295218	CD56+ NK	0.00962608	1
WIPF2	-0.345237	CD56+ NK	0.00225564	1
SLC39A11	-0.435742	CD56+ NK	8.34472e-05	0.313678
UBALD2	0.301086	CD56+ NK	0.00821902	1
TNRC6C	-0.301743	CD56+ NK	0.0080734	1
OXLD1	0.302454	CD56+ NK	0.00791821	1
SIRT7	0.313204	CD56+ NK	0.00587134	1	yes
AP001011.1	-0.436495	CD56+ NK	8.08585e-05	0.304028
LDLRAD4	-0.302344	CD56+ NK	0.00794191	1
WDR7	-0.328578	CD56+ NK	0.00375636	1
PHLPP1	-0.30084	CD56+ NK	0.00827422	1
ATP9B	-0.29861	CD56+ NK	0.00878904	1
RAB5IF	0.29753	CD56+ NK	0.00904848	1
NCOA3	-0.359914	CD56+ NK	0.00140611	1
DPM1	-0.30839	CD56+ NK	0.00672176	1
ZNF217	-0.302891	CD56+ NK	0.00782401	1
ATP5F1D	0.343186	CD56+ NK	0.00240546	1
CIRBP	0.316473	CD56+ NK	0.00534949	1
TIMM13	0.302276	CD56+ NK	0.00795676	1
ALKBH7	0.339452	CD56+ NK	0.00270119	1
PIN1	0.345333	CD56+ NK	0.00224886	1	yes
PGLS	0.325227	CD56+ NK	0.00414846	1
FKBP8	0.335499	CD56+ NK	0.00304932	1
YPEL1	0.310729	CD56+ NK	0.00629596	1		yes
YWHAH	0.329399	CD56+ NK	0.00366552	1
MKL1	-0.375971	CD56+ NK	0.000816851	1
RBX1	0.3268	CD56+ NK	0.0039601	1
PACSIN2	-0.312931	CD56+ NK	0.00591698	1
CRELD2	0.3358	CD56+ NK	0.00302148	1
PGD	0.315553	cDC2	0.00929174	1
PEX14	-0.32264	cDC2	0.0077484	1
CROCC	-0.427545	cDC2	0.000307793	1
EIF4G3	-0.480506	cDC2	3.86677e-05	0.23885
TRIT1	-0.425069	cDC2	0.000336408	1
SCMH1	-0.313118	cDC2	0.00988074	1
PPCS	0.316152	cDC2	0.00915167	1
PRDX1	0.358593	cDC2	0.0028848	1	yes
FAF1	-0.314655	cDC2	0.00950533	1
NEGR1	-0.361088	cDC2	0.00268209	1
EVI5	-0.377837	cDC2	0.00162009	1
DPYD-AS1	-0.354461	cDC2	0.00325065	1
CDC14A	-0.355299	cDC2	0.00317324	1
WDR47	-0.331643	cDC2	0.00611433	1
TRIM33	-0.318368	cDC2	0.00864933	1
CD58	-0.346775	cDC2	0.00404228	1
SLC39A1	0.348412	cDC2	0.00386063	1
HAX1	0.32809	cDC2	0.00671899	1
MEF2D	-0.313457	cDC2	0.00979676	1
PPP1R12B	-0.324656	cDC2	0.0073525	1
SRP9	0.314814	cDC2	0.00946705	1
PCNX2	-0.433673	cDC2	0.00024626	1
NOL10	-0.331304	cDC2	0.00616994	1
PLB1	-0.316631	cDC2	0.00904095	1
LINC00486	-0.323578	cDC2	0.0075619	1
PNPT1	-0.363204	cDC2	0.00252026	1
VPS54	-0.327052	cDC2	0.00690526	1
TMEM131	-0.369393	cDC2	0.00209585	1
CCDC93	-0.335656	cDC2	0.00548954	1
AC012447.1	-0.470665	cDC2	5.83613e-05	0.360381
MGAT5	-0.380153	cDC2	0.00150784	1		yes
R3HDM1	-0.342922	cDC2	0.00450002	1
GPD2	-0.313217	cDC2	0.00985598	1
CYTIP	0.32252	cDC2	0.00777249	1
STK39	-0.343262	cDC2	0.00445793	1
AC010894.3	-0.408181	cDC2	0.000606079	1
ZNF804A	-0.493542	cDC2	2.19767e-05	0.135772
CAB39	-0.362685	cDC2	0.00255913	1
AC026202.2	-0.321043	cDC2	0.00807509	1
NR2C2	-0.340846	cDC2	0.00476522	1
LRRFIP2	-0.322141	cDC2	0.00784922	1
OXSR1	-0.400655	cDC2	0.000780232	1
TRAK1	-0.341764	cDC2	0.00464626	1
LARS2	-0.322101	cDC2	0.00785734	1
IP6K1	-0.332801	cDC2	0.00592793	1
SLMAP	-0.454814	cDC2	0.000110364	0.681278
THOC7	0.376739	cDC2	0.0016759	1
TMCC1	-0.373625	cDC2	0.00184369	1
PLSCR1	-0.341185	cDC2	0.00472094	1
ATP11B	-0.318607	cDC2	0.00859649	1
IL1RAP	-0.325994	cDC2	0.00709976	1
LCORL	-0.411674	cDC2	0.00053794	1
ANTXR2	-0.388997	cDC2	0.00114069	1
H2AFZ	0.413311	cDC2	0.000508476	1
GAR1	-0.358334	cDC2	0.00290665	1
ELF2	-0.378217	cDC2	0.00160121	1
MGST2	-0.312678	cDC2	0.00999034	1
KLHL2	-0.378416	cDC2	0.00159135	1
SH3RF1	-0.426886	cDC2	0.000315182	1
NEK1	-0.346276	cDC2	0.00409914	1
GALNT7	-0.342204	cDC2	0.0045903	1
ACSL1	-0.415427	cDC2	0.000472567	1
TENT4A	-0.337951	cDC2	0.00515799	1
ZNF131	-0.399497	cDC2	0.000810725	1
MTREX	-0.364602	cDC2	0.00241823	1
RASA1	-0.392051	cDC2	0.00103403	1
FER	-0.401294	cDC2	0.000763857	1
KDM3B	-0.49468	cDC2	2.08961e-05	0.129117
NR3C1	-0.429082	cDC2	0.000291162	1	yes
UBTD2	-0.363524	cDC2	0.00249661	1
AC022217.3	-0.390214	cDC2	0.00109703	1
EXOC2	-0.412293	cDC2	0.000526624	1
RIPK1	-0.378336	cDC2	0.00159529	1
HIVEP1	-0.363724	cDC2	0.00248192	1
NOL7	0.391911	cDC2	0.0010387	1
NUP153	-0.336434	cDC2	0.00537506	1
CDKAL1	-0.37117	cDC2	0.00198645	1
C6orf106	-0.37121	cDC2	0.00198405	1
ANKS1A	-0.313557	cDC2	0.00977218	1
FKBP5	-0.38157	cDC2	0.00144264	1
BICRAL	-0.358174	cDC2	0.00292016	1
DNPH1	0.337273	cDC2	0.00525413	1
TNFRSF21	-0.318687	cDC2	0.00857894	1
MAP3K7	-0.378855	cDC2	0.00156985	1
QRSL1	-0.319506	cDC2	0.00840085	1
SESN1	-0.436548	cDC2	0.000221474	1
PHACTR2	-0.381351	cDC2	0.00145257	1
SCAF8	-0.361827	cDC2	0.00262458	1
JAZF1	-0.402212	cDC2	0.000740863	1
ZNRF2	-0.367117	cDC2	0.00224384	1
VOPP1	-0.374983	cDC2	0.00176878	1
TRRAP	-0.321961	cDC2	0.0078858	1
[truncated: 7,959 more rows]

## Sheet: Table 5 Blood_age_predictio
sampleId	projectId
GSM4138162	GSE139324
GSM4138163	GSE139324
GSM4138164	GSE139324
GSM4138165	GSE139324
GSM4138166	GSE139324
GSM4138167	GSE139324
GSM4509015	GSE149689
GSM4509023	GSE149689
GSM4509024	GSE149689
GSM4509029	GSE149689
GSM4712893	GSE155673
GSM4712895	GSE155673
GSM4712897	GSE155673
GSM4712905	GSE155673
GSM4712907	GSE155673
GSM4905216	GSE161354
GSM4905217	GSE161354
GSM4954813	GSE162577
GSM5238894	GSE171964
GSM5238902	GSE171964
GSM5238910	GSE171964
GSM5238918	GSE171964
GSM5238930	GSE171964
GSM5238937	GSE171964
SAMN18497890	PRJNA717310
SAMN18497891	PRJNA717310
SAMN18497892	PRJNA717310
HRR059129	HRA000150
HRR059130	HRA000150
HRR059131	HRA000150
HRR059132	HRA000150
HRX059678	HRA000203
HRX059679	HRA000203
HRX059680	HRA000203
HRX059681	HRA000203
HRX059682	HRA000203
HRX059683	HRA000203
HRX059684	HRA000203
HRX059685	HRA000203
HRX059686	HRA000203
HRX059688	HRA000203
HRX059689	HRA000203
HRX059690	HRA000203
HRX059691	HRA000203
HRX059692	HRA000203
HRX059693	HRA000203

## Sheet: Table 6 Disease_age_prediction
cluster	predict	sample	age	disease
CD14+MHCIIhigh monocyte	60.456	GSM5702263	69	MM
CD14+MHCIIlow monocyte	60.18	GSM5702263	69	MM
CD16+ NK	44.9253	GSM5702263	69	MM
Effector/Memory CD4 T cell	45.6195	GSM5702263	69	MM
GZMB+ CD8 T cell	56.6345	GSM5702263	69	MM
GZMK CD8 T cell	51.5921	GSM5702263	69	MM
Memory B cell	52.2275	GSM5702263	69	MM
Naive B cell	58.9024	GSM5702263	69	MM
Naive CD4 T cell	46.2429	GSM5702263	69	MM
Tissue-resident NK cell	35.6477	GSM5702263	69	MM
CD14+MHCIIhigh monocyte	55.3002	GSM5702264	68	MM
CD14+MHCIIlow monocyte	53.4232	GSM5702264	68	MM
CD16+ monocyte	56.5322	GSM5702264	68	MM
CD16+ NK	41.6219	GSM5702264	68	MM
Effector/Memory CD4 T cell	50.7444	GSM5702264	68	MM
GZMB+ CD8 T cell	60.0609	GSM5702264	68	MM
GZMK CD8 T cell	55.9535	GSM5702264	68	MM
Naive CD4 T cell	49.1988	GSM5702264	68	MM
CD14+MHCIIhigh monocyte	57.3848	GSM5702265	68	MM
CD14+MHCIIlow monocyte	50.7877	GSM5702265	68	MM
CD16+ monocyte	57.8327	GSM5702265	68	MM
CD16+ NK	43.8687	GSM5702265	68	MM
cDC2	41.7409	GSM5702265	68	MM
Effector/Memory CD4 T cell	56.9374	GSM5702265	68	MM
GZMB+ CD8 T cell	52.6797	GSM5702265	68	MM
GZMK CD8 T cell	53.8295	GSM5702265	68	MM
Intermediate EPCAM+ erythroblast	30.6246	GSM5702265	68	MM
MAIT	47.0212	GSM5702265	68	MM
Myelocyte	62.7675	GSM5702265	68	MM
Naive B cell	47.076	GSM5702265	68	MM
Naive CD4 T cell	48.1	GSM5702265	68	MM
Naive CD8 T cell	35.7364	GSM5702265	68	MM
pDC	27.9451	GSM5702265	68	MM
preB cell	61.1816	GSM5702265	68	MM
S100A+ preNeutrophil (cycling)	53.3155	GSM5702265	68	MM
CD14+MHCIIhigh monocyte	55.0525	GSM5702266	74	MM
CD14+MHCIIlow monocyte	51.417	GSM5702266	74	MM
CD16+ NK	50.1039	GSM5702266	74	MM
Effector/Memory CD4 T cell	52.8897	GSM5702266	74	MM
GZMB+ CD8 T cell	67.0446	GSM5702266	74	MM
GZMK CD8 T cell	60.0228	GSM5702266	74	MM
Naive B cell	48.2116	GSM5702266	74	MM
Naive CD4 T cell	53.2608	GSM5702266	74	MM
CD14+MHCIIhigh monocyte	54.7204	GSM5702267	78	MM
CD14+MHCIIlow monocyte	48.2725	GSM5702267	78	MM
CD16+ monocyte	37.406	GSM5702267	78	MM
GZMB+ CD8 T cell	62.2562	GSM5702267	78	MM
CD14+MHCIIhigh monocyte	57.1472	GSM5702268	66	MM
CD14+MHCIIlow monocyte	49.5951	GSM5702268	66	MM
CD16+ monocyte	80.7356	GSM5702268	66	MM
CD16+ NK	37.2698	GSM5702268	66	MM
CD56+ NK	37.6479	GSM5702268	66	MM
Effector/Memory CD4 T cell	54.26	GSM5702268	66	MM
GZMB+ CD8 T cell	62.5509	GSM5702268	66	MM
GZMK CD8 T cell	59.0344	GSM5702268	66	MM
MAIT	42.6045	GSM5702268	66	MM
Naive CD4 T cell	45.8863	GSM5702268	66	MM
Naive CD8 T cell	35.5362	GSM5702268	66	MM
Tissue-resident NK cell	46.1424	GSM5702268	66	MM
Treg	49.5599	GSM5702268	66	MM
CD14+MHCIIhigh monocyte	60.4745	GSM5702269	68	MM
CD14+MHCIIlow monocyte	59.465	GSM5702269	68	MM
CD16+ monocyte	66.23	GSM5702269	68	MM
CD16+ NK	43.0187	GSM5702269	68	MM
GZMB+ CD8 T cell	54.7988	GSM5702269	68	MM
GZMK CD8 T cell	55.4698	GSM5702269	68	MM
Naive CD4 T cell	45.6222	GSM5702269	68	MM
CD14+MHCIIhigh monocyte	53.2171	GSM5702270	66	MM
CD14+MHCIIlow monocyte	51.3732	GSM5702270	66	MM
CD16+ monocyte	47.4674	GSM5702270	66	MM
CD16+ NK	40.5217	GSM5702270	66	MM
Effector/Memory CD4 T cell	53.5577	GSM5702270	66	MM
GZMB+ CD8 T cell	57.4832	GSM5702270	66	MM
GZMK CD8 T cell	59.6133	GSM5702270	66	MM
Intermediate EPCAM+ erythroblast	41.8757	GSM5702270	66	MM
MAIT	43.7985	GSM5702270	66	MM
Memory B cell	51.5538	GSM5702270	66	MM
Myelocyte	50.4035	GSM5702270	66	MM
Naive B cell	54.8349	GSM5702270	66	MM
Naive CD4 T cell	45.881	GSM5702270	66	MM
S100A+ preNeutrophil (cycling)	52.2631	GSM5702270	66	MM
CD14+MHCIIhigh monocyte	52.9805	GSM5702271	70	MM
CD14+MHCIIlow monocyte	44.4691	GSM5702271	70	MM
CD16+ NK	43.525	GSM5702271	70	MM
Effector/Memory CD4 T cell	53.664	GSM5702271	70	MM
GZMB+ CD8 T cell	52.16	GSM5702271	70	MM
GZMK CD8 T cell	54.2917	GSM5702271	70	MM
Naive B cell	56.3679	GSM5702271	70	MM
Naive CD4 T cell	51.9169	GSM5702271	70	MM
Naive CD8 T cell	41.0077	GSM5702271	70	MM
CD14+MHCIIhigh monocyte	56.5642	GSM5702272	71	MM
CD14+MHCIIlow monocyte	54.8014	GSM5702272	71	MM
CD16+ NK	41.9386	GSM5702272	71	MM
Effector/Memory CD4 T cell	57.5318	GSM5702272	71	MM
GZMB+ CD8 T cell	57.7437	GSM5702272	71	MM
GZMK CD8 T cell	54.3038	GSM5702272	71	MM
Naive CD4 T cell	47.3464	GSM5702272	71	MM
Treg	35.2671	GSM5702272	71	MM
CD14+MHCIIhigh monocyte	55.9916	GSM5702273	66	MM
CD14+MHCIIlow monocyte	51.0706	GSM5702273	66	MM
CD16+ monocyte	67.8755	GSM5702273	66	MM
CD16+ NK	41.3237	GSM5702273	66	MM
CD56+ NK	49.5934	GSM5702273	66	MM
Effector/Memory CD4 T cell	64.8114	GSM5702273	66	MM
GZMB+ CD8 T cell	72.937	GSM5702273	66	MM
GZMK CD8 T cell	61.0677	GSM5702273	66	MM
Naive B cell	53.3167	GSM5702273	66	MM
Naive CD4 T cell	43.8264	GSM5702273	66	MM
Naive CD8 T cell	28.8572	GSM5702273	66	MM
CD14+MHCIIhigh monocyte	54.482	GSM5702274	67	MM
CD14+MHCIIlow monocyte	50.064	GSM5702274	67	MM
CD16+ NK	35.5737	GSM5702274	67	MM
Effector/Memory CD4 T cell	56.6133	GSM5702274	67	MM
GZMB+ CD8 T cell	56.7352	GSM5702274	67	MM
GZMK CD8 T cell	55.9909	GSM5702274	67	MM
Naive CD4 T cell	50.8904	GSM5702274	67	MM
Naive CD8 T cell	38.2759	GSM5702274	67	MM
CD14+MHCIIhigh monocyte	53.2906	GSM5702275	78	MM
CD14+MHCIIlow monocyte	54.0503	GSM5702275	78	MM
CD16+ monocyte	49.4377	GSM5702275	78	MM
CD16+ NK	39.0907	GSM5702275	78	MM
Effector/Memory CD4 T cell	63.16	GSM5702275	78	MM
GZMB+ CD8 T cell	58.8183	GSM5702275	78	MM
GZMK CD8 T cell	55.997	GSM5702275	78	MM
MAIT	47.2426	GSM5702275	78	MM
Naive B cell	54.1107	GSM5702275	78	MM
Naive CD4 T cell	42.921	GSM5702275	78	MM
Naive CD8 T cell	35.6823	GSM5702275	78	MM
CD14+MHCIIlow monocyte	47.7248	GSM5702276	69	MM
CD16+ monocyte	39.2149	GSM5702276	69	MM
CD16+ NK	50.1826	GSM5702276	69	MM
Effector/Memory CD4 T cell	61.5418	GSM5702276	69	MM
GZMB+ CD8 T cell	59.3581	GSM5702276	69	MM
GZMK CD8 T cell	64.4478	GSM5702276	69	MM
Naive B cell	62.3299	GSM5702276	69	MM
Naive CD4 T cell	63.0003	GSM5702276	69	MM
preB cell	56.7876	GSM5702276	69	MM
CD14+MHCIIhigh monocyte	55.1751	GSM5702277	77	MM
CD14+MHCIIlow monocyte	51.0113	GSM5702277	77	MM
Effector/Memory CD4 T cell	59.2626	GSM5702277	77	MM
GZMB+ CD8 T cell	57.2496	GSM5702277	77	MM
GZMK CD8 T cell	55.897	GSM5702277	77	MM
Intermediate EPCAM+ erythroblast	47.5207	GSM5702277	77	MM
Naive CD4 T cell	48.0305	GSM5702277	77	MM
CD14+MHCIIhigh monocyte	59.3209	GSM5702278	75	MM
CD14+MHCIIlow monocyte	54.3727	GSM5702278	75	MM
CD16+ monocyte	80.9725	GSM5702278	75	MM
CD16+ NK	53.7251	GSM5702278	75	MM
CD56+ NK	50.9478	GSM5702278	75	MM
Effector/Memory CD4 T cell	55.8656	GSM5702278	75	MM
GZMB+ CD8 T cell	62.2284	GSM5702278	75	MM
GZMK CD8 T cell	57.617	GSM5702278	75	MM
Intermediate EPCAM+ erythroblast	49.6661	GSM5702278	75	MM
Memory B cell	64.4446	GSM5702278	75	MM
Naive B cell	56.0807	GSM5702278	75	MM
Naive CD4 T cell	50.6091	GSM5702278	75	MM
Naive CD8 T cell	37.5488	GSM5702278	75	MM
Treg	55.8285	GSM5702278	75	MM
CD14+MHCIIlow monocyte	53.669	GSM5702279	59	MM
CD16+ NK	49.501	GSM5702279	59	MM
Effector/Memory CD4 T cell	65.988	GSM5702279	59	MM
GZMB+ CD8 T cell	62.8704	GSM5702279	59	MM
GZMK CD8 T cell	58.6823	GSM5702279	59	MM
Naive CD4 T cell	48.8463	GSM5702279	59	MM
Tissue-resident NK cell	49.8157	GSM5702279	59	MM
CD14+MHCIIhigh monocyte	49.5753	AML0024_3p	64	AML
CD14+MHCIIlow monocyte	46.9505	AML0024_3p	64	AML
CD16+ monocyte	74.8173	AML0024_3p	64	AML
CD16+ NK	31.5683	AML0024_3p	64	AML
Promyelocyte	34.6713	AML0024_3p	64	AML
S100A+ preNeutrophil (cycling)	55.4225	AML0024_3p	64	AML
CD14+MHCIIhigh monocyte	44.9753	AML003_3p	NA	AML
CD14+MHCIIlow monocyte	43.1867	AML003_3p	NA	AML
CD16+ monocyte	32.8819	AML003_3p	NA	AML
cDC2	35.896	AML003_3p	NA	AML
CMP	16.2901	AML003_3p	NA	AML
GMP	41.6012	AML003_3p	NA	AML
Myelocyte	39.7943	AML003_3p	NA	AML
Naive B cell	39.4787	AML003_3p	NA	AML
Promyelocyte	34.8192	AML003_3p	NA	AML
S100A+ preNeutrophil (cycling)	50.8119	AML003_3p	NA	AML
CD14+MHCIIhigh monocyte	35.63	AML0048_3p	70	AML
CD14+MHCIIlow monocyte	50.3297	AML0048_3p	70	AML
CD16+ NK	39.687	AML0048_3p	70	AML
cDC2	53.5847	AML0048_3p	70	AML
Effector/Memory CD4 T cell	39.4427	AML0048_3p	70	AML
GMP	32.5273	AML0048_3p	70	AML
GZMB+ CD8 T cell	38.9145	AML0048_3p	70	AML
GZMK CD8 T cell	33.9204	AML0048_3p	70	AML
Naive B cell	36.6366	AML0048_3p	70	AML
CD14+MHCIIhigh monocyte	40.7403	AML006_3p	11.8	AML
CD14+MHCIIlow monocyte	52.1262	AML006_3p	11.8	AML
CD16+ NK	34.0207	AML006_3p	11.8	AML
Effector/Memory CD4 T cell	35.3609	AML006_3p	11.8	AML
GZMB+ CD8 T cell	41.7087	AML006_3p	11.8	AML
GZMK CD8 T cell	46.0045	AML006_3p	11.8	AML
Intermediate EPCAM+ erythroblast	1.76687	AML006_3p	11.8	AML
Memory B cell	38.6841	AML006_3p	11.8	AML
Naive B cell	37.9165	AML006_3p	11.8	AML
Naive CD4 T cell	29.6536	AML006_3p	11.8	AML
Naive CD8 T cell	23.1313	AML006_3p	11.8	AML
preB cell	38.9219	AML006_3p	11.8	AML
CD14+MHCIIlow monocyte	33.5713	AML009_3p	3.25	AML
GMP	27.6212	AML009_3p	3.25	AML
Memory B cell	30.4677	AML009_3p	3.25	AML
Naive B cell	46.2824	AML009_3p	3.25	AML
CD14+MHCIIhigh monocyte	37.9699	AML0114_3p	58	AML
CD14+MHCIIlow monocyte	47.0953	AML0114_3p	58	AML
CD16+ NK	38.9303	AML0114_3p	58	AML
CD56+ NK	31.8318	AML0114_3p	58	AML
Effector/Memory CD4 T cell	30.5546	AML0114_3p	58	AML
GZMB+ CD8 T cell	37.6161	AML0114_3p	58	AML
GZMK CD8 T cell	42.9704	AML0114_3p	58	AML
Memory B cell	44.0046	AML0114_3p	58	AML
Naive B cell	34.287	AML0114_3p	58	AML
Naive CD4 T cell	29.3024	AML0114_3p	58	AML
CD14+MHCIIhigh monocyte	45.5897	AML012_3p	1	AML
CD14+MHCIIlow monocyte	53.2797	AML012_3p	1	AML
cDC2	28.4197	AML012_3p	1	AML
GMP	44.9124	AML012_3p	1	AML
Memory B cell	44.0617	AML012_3p	1	AML
Myelocyte	52.8893	AML012_3p	1	AML
Naive B cell	40.6331	AML012_3p	1	AML
preB cell	47.0468	AML012_3p	1	AML
Promyelocyte	31.8611	AML012_3p	1	AML
S100A+ preNeutrophil (cycling)	41.9043	AML012_3p	1	AML
CD14+MHCIIhigh monocyte	44.419	AML0160_3p	74	AML
CD14+MHCIIlow monocyte	53.7051	AML0160_3p	74	AML
CD14+MHCIIhigh monocyte	40.2719	AML025_3p	14.16	AML
CD14+MHCIIlow monocyte	51.7333	AML025_3p	14.16	AML
CMP	31.0977	AML025_3p	14.16	AML
GMP	43.2528	AML025_3p	14.16	AML
GZMK CD8 T cell	32.9891	AML025_3p	14.16	AML
Memory B cell	35.7973	AML025_3p	14.16	AML
Myelocyte	38.583	AML025_3p	14.16	AML
Naive B cell	33.4234	AML025_3p	14.16	AML
Naive CD4 T cell	31.1595	AML025_3p	14.16	AML
pDC	38.4639	AML025_3p	14.16	AML
Promyelocyte	31.8084	AML025_3p	14.16	AML
S100A+ preNeutrophil (cycling)	46.4634	AML025_3p	14.16	AML
CD14+MHCIIlow monocyte	55.4483	AML026_3p	0.67	AML
Memory B cell	45.208	AML026_3p	0.67	AML
Naive B cell	36.069	AML026_3p	0.67	AML
preB cell	42.6537	AML026_3p	0.67	AML
CD14+MHCIIhigh monocyte	46.2308	AML028_3p	0.17	AML
CD14+MHCIIlow monocyte	51.3699	AML028_3p	0.17	AML
Memory B cell	40.1185	AML028_3p	0.17	AML
Myelocyte	43.9869	AML028_3p	0.17	AML
Naive B cell	39.3845	AML028_3p	0.17	AML
preB cell	52.7873	AML028_3p	0.17	AML
Promyelocyte	39.3367	AML028_3p	0.17	AML
S100A+ preNeutrophil (cycling)	51.5948	AML028_3p	0.17	AML
CD14+MHCIIhigh monocyte	34.4761	AML0310_3p	64	AML
CD14+MHCIIlow monocyte	50.6632	AML0310_3p	64	AML
CD56+ NK	28.7995	AML0310_3p	64	AML
cDC2	32.7533	AML0310_3p	64	AML
GZMB+ CD8 T cell	46.5096	AML0310_3p	64	AML
GZMK CD8 T cell	47.5821	AML0310_3p	64	AML
Myelocyte	41.7829	AML0310_3p	64	AML
Promyelocyte	42.5967	AML0310_3p	64	AML
S100A+ preNeutrophil (cycling)	44.4474	AML0310_3p	64	AML
CD14+MHCIIhigh monocyte	39.5489	AML0361_3p	74	AML
CD14+MHCIIlow monocyte	51.2353	AML0361_3p	74	AML
CD14+MHCIIhigh monocyte	50.2646	AML038_3p	21.1	AML
CD14+MHCIIlow monocyte	53.7811	AML038_3p	21.1	AML
GMP	37.3936	AML038_3p	21.1	AML
Myelocyte	44.1719	AML038_3p	21.1	AML
CD14+MHCIIhigh monocyte	40.2928	AML048_3p	2.9	AML
CD14+MHCIIlow monocyte	52.5678	AML048_3p	2.9	AML
Memory B cell	43.3425	AML048_3p	2.9	AML
Naive B cell	39.3217	AML048_3p	2.9	AML
Naive CD4 T cell	25.6764	AML048_3p	2.9	AML
CD14+MHCIIhigh monocyte	43.4886	AML051_3p	1.6	AML
CD14+MHCIIlow monocyte	39.322	AML051_3p	1.6	AML
Naive B cell	42.3098	AML051_3p	1.6	AML
Naive CD4 T cell	39.5205	AML051_3p	1.6	AML
CD14+MHCIIhigh monocyte	46.9377	AML052_3p	4.5	AML
CD14+MHCIIlow monocyte	37.4549	AML052_3p	4.5	AML
CD16+ NK	48.9834	AML052_3p	4.5	AML
Effector/Memory CD4 T cell	50.7627	AML052_3p	4.5	AML
GMP	33.3955	AML052_3p	4.5	AML
GZMB+ CD8 T cell	35.9117	AML052_3p	4.5	AML
GZMK CD8 T cell	44.563	AML052_3p	4.5	AML
Memory B cell	45.9355	AML052_3p	4.5	AML
Naive B cell	40.6029	AML052_3p	4.5	AML
Naive CD4 T cell	55.5658	AML052_3p	4.5	AML
Promyelocyte	38.0829	AML052_3p	4.5	AML
CD14+MHCIIhigh monocyte	39.3555	AML055_3p	12.6	AML
CD14+MHCIIlow monocyte	43.8619	AML055_3p	12.6	AML
CD16+ NK	44.8768	AML055_3p	12.6	AML
Effector/Memory CD4 T cell	41.8097	AML055_3p	12.6	AML
GMP	48.5881	AML055_3p	12.6	AML
GZMB+ CD8 T cell	43.4886	AML055_3p	12.6	AML
GZMK CD8 T cell	41.5838	AML055_3p	12.6	AML
Naive B cell	38.4156	AML055_3p	12.6	AML
Naive CD4 T cell	35.7183	AML055_3p	12.6	AML
Naive CD8 T cell	43.3216	AML055_3p	12.6	AML
Promyelocyte	22.7146	AML055_3p	12.6	AML
S100A+ preNeutrophil (cycling)	46.5771	AML055_3p	12.6	AML
CD14+MHCIIhigh monocyte	45.0043	AML056_3p	6.6	AML
CD14+MHCIIlow monocyte	50.9803	AML056_3p	6.6	AML
GZMB+ CD8 T cell	37.484	AML056_3p	6.6	AML
GZMK CD8 T cell	40.4121	AML056_3p	6.6	AML
Memory B cell	46.6658	AML056_3p	6.6	AML
Naive B cell	36.0122	AML056_3p	6.6	AML
Naive CD4 T cell	23.6146	AML056_3p	6.6	AML
preB cell	51.3402	AML056_3p	6.6	AML
CD16+ NK	42.0603	AML0612_3p	64	AML
Effector/Memory CD4 T cell	46.0761	AML0612_3p	64	AML
GZMB+ CD8 T cell	42.2448	AML0612_3p	64	AML
GZMK CD8 T cell	45.324	AML0612_3p	64	AML
Naive CD4 T cell	36.1693	AML0612_3p	64	AML
CD14+MHCIIlow monocyte	53.5281	AML0693_3p	77	AML
CMP	19.2297	AML0693_3p	77	AML
GZMK CD8 T cell	41.3045	AML0693_3p	77	AML
Intermediate EPCAM+ erythroblast	40.354	AML0693_3p	77	AML
Memory B cell	40.0806	AML0693_3p	77	AML
Naive B cell	34.7218	AML0693_3p	77	AML
Naive CD4 T cell	27.7589	AML0693_3p	77	AML
preB cell	41.2518	AML0693_3p	77	AML
Promyelocyte	25.9968	AML0693_3p	77	AML
S100A+ preNeutrophil (cycling)	51.5934	AML0693_3p	77	AML
CD14+MHCIIhigh monocyte	43.2981	AML073_3p	NA	AML
CD14+MHCIIlow monocyte	40.9572	AML073_3p	NA	AML
CD16+ NK	34.8581	AML073_3p	NA	AML
Effector/Memory CD4 T cell	32.247	AML073_3p	NA	AML
GZMB+ CD8 T cell	38.445	AML073_3p	NA	AML
GZMK CD8 T cell	28.8722	AML073_3p	NA	AML
Memory B cell	39.0971	AML073_3p	NA	AML
Naive B cell	38.2501	AML073_3p	NA	AML
preB cell	49.3635	AML073_3p	NA	AML
CD14+MHCIIhigh monocyte	44.4817	AML1371_3p	78	AML
CD14+MHCIIlow monocyte	46.788	AML1371_3p	78	AML
CD16+ NK	35.6264	AML1371_3p	78	AML
CD56+ NK	40.6815	AML1371_3p	78	AML
Effector/Memory CD4 T cell	38.0092	AML1371_3p	78	AML
GMP	39.4949	AML1371_3p	78	AML
GZMB+ CD8 T cell	38.9934	AML1371_3p	78	AML
GZMK CD8 T cell	43.949	AML1371_3p	78	AML
MAIT	36.1297	AML1371_3p	78	AML
Memory B cell	45.6775	AML1371_3p	78	AML
Naive CD4 T cell	37.1264	AML1371_3p	78	AML
preB cell	55.9714	AML1371_3p	78	AML
Treg	32.6468	AML1371_3p	78	AML
Effector/Memory CD4 T cell	34.909	AML2123_3p	71	AML
GMP	44.5891	AML2123_3p	71	AML
GZMB+ CD8 T cell	47.1491	AML2123_3p	71	AML
GZMK CD8 T cell	41.3038	AML2123_3p	71	AML
Intermediate EPCAM+ erythroblast	38.733	AML2123_3p	71	AML
Memory B cell	27.3487	AML2123_3p	71	AML
CD14+MHCIIhigh monocyte	36.2306	AML2910_3p	73	AML
CD14+MHCIIlow monocyte	41.612	AML2910_3p	73	AML
CD16+ monocyte	53.047	AML2910_3p	73	AML
cDC2	3.03902	AML2910_3p	73	AML
CMP	31.426	AML2910_3p	73	AML
GMP	32.417	AML2910_3p	73	AML
Myelocyte	51.1418	AML2910_3p	73	AML
pDC	20.1989	AML2910_3p	73	AML
S100A+ preNeutrophil (cycling)	44.247	AML2910_3p	73	AML
CD14+MHCIIhigh monocyte	43.1063	AML3050_3p	81	AML
CD14+MHCIIlow monocyte	46.0279	AML3050_3p	81	AML
CD14+MHCIIhigh monocyte	39.6574	AML3133_3p	57	AML
CD14+MHCIIlow monocyte	44.8616	AML3133_3p	57	AML
CD16+ monocyte	43.9203	AML3133_3p	57	AML
CD16+ NK	32.2819	AML3133_3p	57	AML
Effector/Memory CD4 T cell	42.9378	AML3133_3p	57	AML
GMP	37.8897	AML3133_3p	57	AML
GZMB+ CD8 T cell	45.2159	AML3133_3p	57	AML
GZMK CD8 T cell	42.2643	AML3133_3p	57	AML
Naive B cell	41.8607	AML3133_3p	57	AML
Naive CD4 T cell	40.1889	AML3133_3p	57	AML
preB cell	51.4779	AML3133_3p	57	AML
Treg	11.0088	AML3133_3p	57	AML
CD16+ NK	43.6381	AML3266_3p	32	AML
GZMB+ CD8 T cell	38.6639	AML3266_3p	32	AML
GZMK CD8 T cell	44.3278	AML3266_3p	32	AML
Naive CD4 T cell	36.6002	AML3266_3p	32	AML
CD14+MHCIIhigh monocyte	48.6795	AML3730_3p	55	AML
CD14+MHCIIlow monocyte	50.8163	AML3730_3p	55	AML
CD16+ monocyte	50.8504	AML3730_3p	55	AML
cDC2	51.1193	AML3730_3p	55	AML
Myelocyte	53.8458	AML3730_3p	55	AML
Naive B cell	42.9187	AML3730_3p	55	AML
S100A+ preNeutrophil (cycling)	46.05	AML3730_3p	55	AML
CD14+MHCIIhigh monocyte	43.84	AML3762_3p	62	AML
CD14+MHCIIlow monocyte	45.5919	AML3762_3p	62	AML
CD16+ NK	41.0917	AML3762_3p	62	AML
cDC2	22.0192	AML3762_3p	62	AML
Effector/Memory CD4 T cell	39.1613	AML3762_3p	62	AML
GMP	44.3657	AML3762_3p	62	AML
GZMB+ CD8 T cell	36.0597	AML3762_3p	62	AML
GZMK CD8 T cell	41.4422	AML3762_3p	62	AML
Intermediate EPCAM+ erythroblast	31.5944	AML3762_3p	62	AML
Naive CD4 T cell	31.9561	AML3762_3p	62	AML
Promyelocyte	37.5506	AML3762_3p	62	AML
S100A+ preNeutrophil (cycling)	46.4033	AML3762_3p	62	AML
CD14+MHCIIhigh monocyte	38.0733	AML3948_3p	78	AML
CD14+MHCIIlow monocyte	46.6493	AML3948_3p	78	AML
cDC2	29.6319	AML3948_3p	78	AML
GMP	51.4705	AML3948_3p	78	AML
GZMB+ CD8 T cell	45.9127	AML3948_3p	78	AML
GZMK CD8 T cell	47.4149	AML3948_3p	78	AML
Memory B cell	37.9094	AML3948_3p	78	AML
Myelocyte	54.4613	AML3948_3p	78	AML
Naive B cell	43.364	AML3948_3p	78	AML
Naive CD4 T cell	45.6566	AML3948_3p	78	AML
Promyelocyte	35.5529	AML3948_3p	78	AML
S100A+ preNeutrophil (cycling)	43.1817	AML3948_3p	78	AML
CD14+MHCIIhigh monocyte	51.3117	AML4340_3p	80	AML
CD14+MHCIIlow monocyte	57.6778	AML4340_3p	80	AML
CD16+ NK	43.681	AML4340_3p	80	AML
CD56+ NK	33.7123	AML4340_3p	80	AML
Effector/Memory CD4 T cell	39.0339	AML4340_3p	80	AML
GZMB+ CD8 T cell	39.0678	AML4340_3p	80	AML
GZMK CD8 T cell	45.1631	AML4340_3p	80	AML
MAIT	30.1274	AML4340_3p	80	AML
Memory B cell	48.4892	AML4340_3p	80	AML
Naive B cell	38.3998	AML4340_3p	80	AML
Naive CD4 T cell	32.7001	AML4340_3p	80	AML
Treg	34.1887	AML4340_3p	80	AML
CD16+ NK	39.742	AML4897_3p	65	AML
CD56+ NK	36.4876	AML4897_3p	65	AML
Effector/Memory CD4 T cell	42.0344	AML4897_3p	65	AML
GZMB+ CD8 T cell	46.3766	AML4897_3p	65	AML
GZMK CD8 T cell	50.2778	AML4897_3p	65	AML
Memory B cell	41.6233	AML4897_3p	65	AML
Naive B cell	35.9546	AML4897_3p	65	AML
Naive CD4 T cell	30.9448	AML4897_3p	65	AML
CD14+MHCIIhigh monocyte	44.0757	PAUMTZ_3p	9.9	AML
CD14+MHCIIlow monocyte	42.7252	PAUMTZ_3p	9.9	AML
cDC2	60.0119	PAUMTZ_3p	9.9	AML
Memory B cell	36.7349	PAUMTZ_3p	9.9	AML
Naive B cell	42.4797	PAUMTZ_3p	9.9	AML
Promyelocyte	46.1724	PAUMTZ_3p	9.9	AML
S100A+ preNeutrophil (cycling)	48.2413	PAUMTZ_3p	9.9	AML
CD14+MHCIIhigh monocyte	42.5716	PAXMIJ_3p	6.17	AML
CD14+MHCIIlow monocyte	28.5907	PAXMIJ_3p	6.17	AML

## Sheet: Table 7 MM_plasma_DEGs
	p_val	avg_log2FC	pct.1	pct.2	p_val_adj
CROCC	0	-0.622276	0.037	0.519	0
IER5	0	0.77432	0.733	0.104	0
RPL31	0	-0.599025	0.876	0.946	0
ZBTB38	0	0.622376	0.902	0.469	0
CLPTM1L	0	0.714837	0.894	0.37	0
TRIO	0	-0.508958	0.094	0.475	0
CD74	0	-0.620747	0.769	0.936	0
AC016831.7	0	-1.2482	0.335	0.801	0
RAPGEF1	0	-0.784647	0.227	0.705	0
PPP1R14B	0	0.728312	0.775	0.122	0
SIK3	0	-0.673536	0.259	0.658	0
CD27	0	-0.788211	0.234	0.748	0
IFNG-AS1	0	-0.675602	0.235	0.629	0
USP3-AS1	0	-0.521142	0.077	0.502	0
WWOX	0	-0.760712	0.123	0.603	0
TEX14	0	-1.15837	0.068	0.71	0
GNAS	0	0.60993	0.98	0.716	0
JUND	0	1.04757	0.986	0.614	0
FOSB	0	0.815386	0.93	0.529	0
FNBP1	5.50185e-306	-0.697509	0.333	0.736	1.84521e-301
TRAF3	1.26135e-304	-0.514451	0.184	0.568	4.2303e-300
UBE2M	1.30317e-302	0.50605	0.723	0.125	4.37056e-298
PDE4D	3.8009e-295	-0.551442	0.091	0.401	1.27475e-290
TXNIP	1.08499e-287	0.738016	0.907	0.582	3.63884e-283
CDV3	6.69373e-287	0.552147	0.92	0.504	2.24494e-282
KLF2	5.02435e-286	0.635739	0.948	0.709	1.68507e-281
CD79A	6.55653e-284	-0.628514	0.278	0.726	2.19893e-279
CTSZ	1.64021e-279	0.574475	0.774	0.252	5.50095e-275
MYO1D	5.80007e-274	-0.596679	0.259	0.629	1.94523e-269
GNG7	3.01366e-273	-0.647168	0.599	0.837	1.01072e-268
RPL36A	5.5829e-273	-0.627874	0.622	0.845	1.87239e-268
RPS17	5.84614e-265	-0.610495	0.648	0.849	1.96068e-260
HSP90AB1	1.41343e-257	0.537813	0.952	0.679	4.74035e-253
IGHM	2.50947e-248	-1.40303	0.058	0.308	8.41627e-244
NEAT1	4.58096e-245	0.503956	0.971	0.826	1.53636e-240
BMI1	1.44792e-238	0.532742	0.708	0.203	4.85604e-234
NFKBIA	2.16165e-222	0.632375	0.931	0.729	7.24975e-218
NDUFAF6	6.17719e-219	-0.501983	0.225	0.555	2.07171e-214
CD48	2.27432e-217	0.572529	0.865	0.569	7.62761e-213
FOS	1.09842e-215	0.626225	0.917	0.63	3.68389e-211
GADD45A	1.53568e-215	0.672587	0.668	0.196	5.15037e-211
OTUD1	8.1234e-214	0.746218	0.729	0.292	2.72443e-209
FNDC3B	1.10047e-213	-0.648277	0.758	0.836	3.69075e-209
DENND4A	1.44925e-210	-0.5356	0.261	0.593	4.8605e-206
EGR1	4.67182e-206	0.689901	0.59	0.11	1.56683e-201
MCL1	5.50179e-205	0.505431	0.939	0.7	1.84519e-200
BTG2	1.78659e-202	0.5319	0.884	0.457	5.99188e-198
STAG1	8.79306e-202	-0.536604	0.35	0.654	2.94902e-197
ID2	1.62481e-201	0.684626	0.59	0.118	5.4493e-197
HIST1H1C	1.25224e-196	0.685456	0.814	0.424	4.19978e-192
ETV6	4.41412e-187	-0.518936	0.347	0.633	1.48041e-182
MBNL2	6.43349e-185	-0.530122	0.39	0.667	2.15766e-180
EIF2AK3	1.08503e-177	-0.650973	0.565	0.734	3.63898e-173
EPRS	2.3121e-175	0.500991	0.76	0.38	7.75431e-171
RABGAP1L	2.68986e-168	-0.540131	0.447	0.694	9.02124e-164
FOXN3	1.40416e-161	-0.576904	0.582	0.754	4.70927e-157
CAMK1D	7.5727e-160	-0.520444	0.292	0.562	2.53973e-155
LINC01480	2.78977e-152	0.612523	0.544	0.166	9.35633e-148
IGHA1	1.02562e-147	-2.06086	0.481	0.736	3.43973e-143
NCOA3	2.21991e-147	-0.554985	0.593	0.751	7.44513e-143
ATF3	4.12676e-147	0.60616	0.622	0.262	1.38403e-142
IGHD	3.32607e-144	1.57841	0.451	0.081	1.1155e-139
PDIA2	1.19134e-140	0.797913	0.366	0.006	3.99551e-136
PSMA7	5.11439e-137	0.50665	0.883	0.605	1.71527e-132
IER2	8.07969e-130	0.541893	0.817	0.663	2.70977e-125
CCL3	3.53457e-119	0.763791	0.458	0.123	1.18542e-114
FCHSD2	3.23214e-109	-0.506313	0.367	0.572	1.084e-104
IFI27	4.91121e-105	0.727611	0.333	0.036	1.64712e-100
JCHAIN	3.05339e-94	-0.811057	0.536	0.723	1.02405e-89
RND3	2.32781e-87	0.504919	0.251	0.002	7.80699e-83
IFI6	9.29732e-86	0.630953	0.513	0.279	3.11814e-81
IGHGP	5.16554e-77	-0.616101	0.177	0.383	1.73242e-72
IGHG2	8.07989e-61	-1.47387	0.209	0.358	2.70983e-56
ANXA1	1.87231e-56	0.512693	0.255	0.061	6.27934e-52
IGKC	1.2465e-39	-3.20705	0.588	0.777	4.18052e-35
IGHA2	1.34319e-31	-0.877635	0.283	0.41	4.5048e-27
IGLC3	1.88797e-18	-1.96526	0.367	0.45	6.33187e-14
IGLC2	7.22244e-10	-2.42659	0.463	0.613	2.42226e-05
IGHG1	3.29946e-07	-1.33775	0.423	0.557	0.0110657
MALAT1	6.00644e-07	-0.736403	0.994	0.962	0.0201444
